1 **Patterns of selection reveal shared molecular targets over short and**  
2 **long evolutionary timescales**

3

4 Jing Li<sup>1</sup>, Ignacio Vázquez-García<sup>2,3</sup>, Karl Persson<sup>4</sup>, Asier González<sup>5</sup>, Jia-Xing Yue<sup>1</sup>, Benjamin  
5 Barré<sup>1</sup>, Michael N. Hall<sup>5</sup>, Anthony D. Long<sup>6</sup>, Jonas Warringer<sup>4</sup>, Ville Mustonen<sup>7</sup> and Gianni Liti<sup>1</sup>

6

7 <sup>1</sup>Université Côte d'Azur, CNRS, Inserm, IRCAN, Nice, France; <sup>2</sup>Wellcome Trust Sanger Institute,  
8 Hinxton, Cambridge CB10 1SA, United Kingdom; <sup>3</sup>Department of Applied Mathematics and  
9 Theoretical Physics, University of Cambridge, Cambridge CB3 0WA, United Kingdom;

10 <sup>4</sup>Department of Chemistry and Molecular Biology, University of Gothenburg, Gothenburg,  
11 Sweden; <sup>5</sup>Biozentrum, University of Basel, Klingelbergstrasse 70, CH4056 Basel, Switzerland;

12 <sup>6</sup>Department of Ecology and Evolutionary Biology, University of California, Irvine, California  
13 92697, USA. <sup>7</sup>Department of Biosciences, Department of Computer Science, Institute of  
14 Biotechnology, University of Helsinki, PO Box 65, 00014 Helsinki, Finland

15

16 Correspondence should be addressed to G.L. ([gianni.liti@unice.fr](mailto:gianni.liti@unice.fr)).

17

## 1 Abstract

2 Standing and *de novo* genetic variants can both drive adaptation to environmental changes, but  
3 their relative contributions and interplay remain poorly understood. Here we investigated the  
4 dynamics of drug adaptation in yeast populations with different levels of standing variation by  
5 experimental evolution coupled with time-resolved sequencing and phenotyping. We found a  
6 doubling of standing variation alone boost the adaptation by 64.1% and 51.5% in hydroxyurea and  
7 rapamycin respectively. The causative standing and *de novo* variants were selected on shared  
8 targets of *RNR4* in hydroxyurea and *TOR1*, *TOR2* in rapamycin. The standing and *de novo* TOR  
9 variants map to different functional domains and act via distinct mechanisms. Interestingly,  
10 standing TOR variants from two domesticated strains exhibited opposite resistance effects,  
11 reflecting lineage-specific functional divergence. This study provides a dynamic view on how  
12 standing and *de novo* variants interactively drive adaptation and deepens our understanding of  
13 clonally evolving diseases.

14

## 15 Introduction

16 Darwinian evolution promotes phenotypic adaptation in nature and has important implications in  
17 biomedical practices. For example, the emergence of drug resistance during infections and cancer  
18 treatment is directly induced by Darwinian evolution in response to drug selection. According to  
19 the classic Neo-Darwinistic paradigm, population fitness increases can be attributed to selection  
20 favoring beneficial alleles and purging deleterious alleles that are either pre-existing genetic  
21 variants segregating in the population before a change in environment (standing variation) or *de*  
22 *novo* mutations emerging after or during an environment change. Beyond scattered examples, the  
23 relative contribution to adaptation from these two distinct sources of genetic variation remains  
24 poorly characterized (Long, Liti, Luptak, & Tenaillon, 2015).

25 Connecting allele frequency, phenotype and fitness change in a causally cohesive manner is  
26 challenging in both natural and clinical populations, but feasible in experimental populations.  
27 Experimental evolution can reveal the molecular determinants of adaptation across a wide range  
28 of biological systems with unprecedented resolution (Long et al., 2015). It can be initiated from  
29 populations with known levels of standing variation, evolved under fixed selection regimes and  
30 preserved *ad infinitum* as frozen fossil records that can be revived and studied in detail. Clonal  
31 evolutions of initially isogenic populations have confirmed key theoretical predictions, notably  
32 how competing clones carrying different beneficial mutations interfere with each other (clonal  
33 interference), and how neutral or slightly deleterious mutations can hitchhike to higher

1 frequencies on the same clone as beneficial mutations (Barrick et al., 2009; Gerrish & Lenski,  
2 1998; Herron & Doebeli, 2013; Kvitek & Sherlock, 2013; Lang et al., 2013; Levy et al., 2015;  
3 Payen et al., 2016; Venkataram et al., 2016). Causal relationships in heterogeneous populations,  
4 usually derived from sexual crosses of diverged parents, are much more challenging to pinpoint,  
5 because of the number of variants that segregate in these populations and the linkage between  
6 them. Nevertheless, experimental evolution using heterogeneous budding yeast, fly and Virginia  
7 chicken populations have shown that standing variation alone can drive adaptation (Burke et al.,  
8 2010; Burke, Liti, & Long, 2014; Parts et al., 2011; Sheng, Pettersson, Honaker, Siegel, &  
9 Carlborg, 2015) with no need for *de novo* mutations to emerge and spread. We recently  
10 performed experimental evolution using heterogeneous populations derived from diverged West  
11 African (WA) and North American (NA) natural yeast strains (hereafter referred to as “two-  
12 parent population”), in two different drugs rapamycin (RM) and hydroxyurea (HU) (Vázquez-  
13 García et al., 2017). RM is an inhibitor of the eukaryotic serine/threonine kinase TOR and HU is  
14 an inhibitor of DNA replication. Specifically, budding yeast contains two TOR genes - *TOR1* and  
15 *TOR2*. They form two different complexes termed TOR complex 1 (TORC1) and TORC2. The  
16 former contains either *TOR1* or *TOR2* and is uniquely sensitive to RM while the latter specifically  
17 contains *TOR2* and is insensitive to RM (Loewith et al., 2002). HU impair DNA synthesis by  
18 inhibiting ribonucleotide reductase and preventing the reduction of ribonucleotides to  
19 deoxyribonucleotides (Koç, Wheeler, Mathews, & Merrill, 2004). In the two-parent population,  
20 we found drug-specific adaptive contributions of standing and *de novo* variants. Selection on  
21 standing variation explained more of growth rate increases in HU (51%) than selection on *de*  
22 *novo* mutations (23%) but less in RM (22% vs 70%).  
23 Overall, the relative contribution of standing and *de novo* variants to adaptation depends on  
24 multiple factors, including the degree of standing variation, the typical fitness effects of standing  
25 and *de novo* variation, the selective constraints imposed by the environment and the relevant time  
26 scales (Long et al., 2015). Theory predicts early adaptation in heterogeneous populations to be  
27 faster because beneficial standing variants are immediately available and less likely to be lost by  
28 drift (Barrett & Schluter, 2008). Standing variants are predicted to disproportionately drive  
29 adaptation when *de novo* beneficial mutations are rare, have small selection coefficients, or when  
30 the duration of selection is short (Hermisson & Pennings, 2005). However, strict experimental  
31 comparisons of adaptation on standing and *de novo* variants are scarce. In particular, it remains to  
32 be explored: (1) how the degree of standing variation affects the adaptation rate and yield, (2)  
33 whether standing and *de novo* variants are selected in a shared target. These questions have a  
34 direct bearing on our understanding of the evolution of resistance to chemotherapy and

1 antimicrobials (Palmer & Kishony, 2013; Turner & Reis-Filho, 2012). To this end, we evolved  
2 highly-heterogeneous yeast populations derived from intercrossing four diverged parents over 12  
3 consecutive meiotic generations (Cubillos et al., 2013) (hereafter referred to as “four-parent  
4 population”, Figure 1A) to fixed concentrations of RM and HU. In comparison to the two-parent  
5 population, the four-parent population has approximately twice the genetic diversity segregating  
6 (1 SNP/120bp vs. 1 SNP/230bp), indicating higher level of standing variation (Cubillos et al.,  
7 2013). We tracked the adaptation of these four-parent populations to the two drugs at high  
8 resolution, comparing the molecular and phenotypic changes to that of the isogenic populations of  
9 the four parental strains as well as the published two-parent populations (Vázquez-García et al.,  
10 2017). We found that the four-parent populations adapted earlier and faster than the two-parent  
11 populations. Resistant standing and *de novo* variants were selected on shared mutational targets  
12 (*RNR4*, *TOR1* and *TOR2*). However, the standing and *de novo* variants of the TOR paralog genes  
13 occur in different domains and conferred RM resistance via distinct mechanisms.

## 14 **Results**

### 15 **Adaptation of isogenic and heterogeneous populations to rapamycin and hydroxyurea**

16 To compare adaptation with and without standing variants, we evolved *S. cerevisiae* populations  
17 with different levels of standing variation for 32 days (> 50 generations) under RM, HU and basal  
18 control condition (no drugs). Four populations (WA, NA, WE, SA – corresponding to strains  
19 West African, North American, Wine/European and Sake background respectively) were quasi-  
20 homogeneous at the onset of selection, corresponding to clonal expansion of the four diploid  
21 parents (Figure 1A, Tables S1-S2). Two four-parent populations (F12\_1 and F12\_2) were  
22 independently derived from the four parents by 12 rounds of intercrossing (Cubillos et al., 2013)  
23 and were therefore highly heterogeneous at the onset of selection. We evolved two replicates of  
24 each isogenic parental population and eight replicates of four-parent populations in batch-to-batch  
25 selection regimes, storing a subsample of each batch (T0 to T14 in HU and T0 to T15 in RM) to  
26 create a dense fossil record.

27 To track the adaptation dynamics comprehensively, we revived the frozen subsamples of all the  
28 isogenic, four-parent populations and the previously published two-parent populations (Vázquez-  
29 García et al., 2017) across all the time points (Tables S1-S2). We estimated their fitness related  
30 properties by both precise measurement of their doubling time and spotting assay (Figures 1B,  
31 S1-S3). Over the whole RM experiment, the adaptive gain between four-parent and two-parent  
32 populations was similar (45.3% vs. 42.6% of doubling time reduction, Mann–Whitney U-test,  $p =$   
33 0.96). However, the early adaptive gain (T0 to T2) was larger in the four-parent populations

1 (19.2% vs. 11.2% of doubling time reduction, Mann–Whitney U-test,  $p = 0.038$ ), highlighting the  
2 advantage of higher level of standing variation in driving expeditious adaptation. There was no  
3 substantial late stage (last three time points) adaptation in either four-parent or two-parent  
4 populations (5.1% of doubling time increase and 1.1% reduction respectively), reflecting  
5 exhaustion of adaptive potentials within the experimental timescale. In HU, the adaptation was  
6 slow, gradual and persisted to the end in both the four-parent and two-parent populations but with  
7 seemingly greater adaptive gains in the four-parent populations (20.4% vs. 12.3% of doubling  
8 time reduction, Mann–Whitney U-test,  $p = 0.06$ ). Therefore, a doubling of segregating diversity  
9 in the four-parent populations translated into more rapid and more remarkable adaptive gains in  
10 both RM and HU. No observable adaptation to control condition (no drug) was observed (Figure  
11 S1).

12 To measure the adaptive gains in individuals independently of their background population, we  
13 isolated > 2,600 random clones from ancestral and a subset of the endpoint populations (Table S2)  
14 and measured their doubling time separately. Before selection (T0), the variability in doubling  
15 time between individuals of the four-parent population was much greater than that in the two-  
16 parent populations (Figure 1C,  $\sigma^2 = 0.43$  vs. 0.12 in RM and  $\sigma^2 = 0.35$  vs. 0.093 in HU). Thus, the  
17 higher genetic diversity of the four-parent populations also translated into higher variation in the  
18 key fitness component under selection, creating the necessary foundation for faster adaptation.  
19 The mean adaptive gain in individuals drawn from four-parent populations at the endpoint also  
20 exceeded that of their counterparts from two-parent populations, with a doubling time reduction  
21 of 48.2% vs. 27.2% in RM and 29.9% vs. 11.2% in HU. This provides independent verification of  
22 the accelerated adaptation in populations with higher level of standing variation (Figures 1C and  
23 S4).

24 Growth phenotyping of both bulk populations (Figures S1 and S3) and individuals drawn from  
25 these populations (Figure S4) showed that all initially isogenic populations (NA, SA, WE, WA)  
26 achieved certain levels of adaptation to RM. The RM-adapted populations grew faster than their  
27 ancestral non-adapted populations regardless of the founding genotype (Figures 1C and S4,  
28 Mann–Whitney U-test,  $p < 2.2 \times 10^{-16}$ ). Individuals drawn from the NA, SA and WE endpoint  
29 populations reached the same level of adaptation as those from the four-parent populations,  
30 whereas those from the WA populations adapted more slowly, which is consistent with their  
31 weaker initial growth. Remarkably, only the NA managed to adapt to HU (28.2% of doubling  
32 time reduction, Mann–Whitney U-test,  $p < 2.2 \times 10^{-16}$ ). Even though NA individuals failed to  
33 reach the same adaptation level of four-parent individuals (Figure 1C; mean endpoint doubling  
34 time 3.16 vs 2.62 hours, Mann–Whitney U-test,  $p < 2.2 \times 10^{-16}$ ). The SA and WE individuals

1 grew worse at the end of HU selection than their respective ancestral states (6.5% and 4.2% of  
2 doubling time increase). The WA individuals went complete extinction after two cultivation  
3 rounds (T2), suggesting the lowest evolvability. In summary, we found that higher level of  
4 standing variation positively impacts the rate of adaptation, the absolute adaptive gains and the  
5 endpoint performance, with exact effects depending on the selection regime.

6

### 7 ***De novo mutations in TOR1 and FPR1 drive rapamycin adaptation in isogenic populations***

8 To lay a solid foundation for understanding the adaptation of the highly heterogeneous four-  
9 parent populations, we sequenced the initially isogenic populations at multiple time points  
10 (Tables S1-S3). As expected, *de novo* mutations drove adaptive evolution in isogenic populations.  
11 In RM, we detected recurrent mutations in *TOR1* and *FPR1* (Figure 2A). *TOR1* mutations (six  
12 mutations in three sites) emerged in all the eight populations, indicating *TOR1* as a background  
13 independent source of RM resistance. In contrast, *FPR1* mutations (frame shift and start codon  
14 disruption in two sites) emerged only in the two NA populations. Surprisingly, all the NA clones  
15 carrying *FPR1* mutations became haploids during selection. This may be a consequence of NA  
16 diploids being highly prone to sporulate even in relatively rich medium (Cubillos, Louis, & Liti,  
17 2009) and a strong selection for haploids carrying loss-of-function *FPR1* mutations given that  
18 they are fully recessive (Vázquez-García et al., 2017). The frequency increase of *TOR1* and *FPR1*  
19 mutations agreed well with the doubling time reduction of the populations in which they emerged  
20 (Figure 2A). This supports that they are true drivers of adaptation, rather than hitchhikers or  
21 drifters, and that adaptation is genetic, rather than initially epigenetic and later genetically  
22 assimilated (Gjuvsland et al., 2016).

23 To quantify the individual contributions of *TOR1* and *FPR1* mutations to RM adaptation, we  
24 isolated and estimated the doubling time of individual clones carrying these mutations (Figure 2B,  
25 Table S4). Except for *FPR1* Met1Ile, the doubling time reduction conferred by each individual  
26 mutation in the relevant state (heterozygous or homozygous) equaled (e.g. *TOR1* S1972I in WE),  
27 or approached (>90%, e.g. *TOR1* W2038L and S1972I in NA) the total doubling time reduction  
28 of the population in which it emerged (Figure 2B). Nearly all the clones from the evolved  
29 populations carried one of these mutations; thus, they were capable of explaining almost the  
30 complete adaptive gains (Heitman, Movva, & Hall, 1991). All RM-adapted populations  
31 performed equally well in presence and absence of RM; thus RM adaptation had plateaued  
32 (Figure S4). *TOR1* mutations recurrently emerging in different genetic backgrounds (Ser1972Ile  
33 in NA, SA and WE and Trp2038Leu in WA and WE) consistently gave complete tolerance to

1 RM (Figure 2B). The larger adaptive gain conferred by *FPR1* Ile11X frame shift than by *FPR1*  
2 Met1Ile stop in the NA background (69.8% vs. 32.9% of doubling time reduction, Mann-  
3 Whitney U-test,  $p = 2.7 \times 10^{-6}$ , Figure 2B) agreed with the near fixation of *FPR1* Ile11X in  
4 NA\_RM\_1 and the low frequency of *FPR1* Met1Ile in NA\_RM\_2 (Figure 2A). Given that both  
5 should be complete loss-of-function mutations, this distinction is intriguing. In the WE  
6 background, the *TOR1* Ser1972Ile homozygous clones grew faster than those with the  
7 heterozygous mutation (Figure 2B, 68.1% vs. 59.8% of doubling time reduction, Mann-Whitney  
8 U-test,  $p = 1.9 \times 10^{-4}$ ), giving them a competitive edge and suggesting that continued selection  
9 should drive the homozygote state to fixation. Such homozygous mutations should have occurred  
10 via loss of heterozygosity, as demonstrated in our previous study (Vázquez-García et al., 2017).  
11 Whole-genome population sequencing uncovered no copy number changes, except in both SA  
12 populations where the sequencing depth of chromosome IX (chrIX) increased under RM selection  
13 (Figure 2C, Table S3). Copy number qPCR confirmed that the RM-evolved diploid SA clones  
14 carried three or four rather than the normal two copies of chrIX. Given that extra chrIX copies  
15 conferred dramatically increased heat sensitivity (Figure S5F), we estimated that ~12.5% and  
16 ~8.3% of the evolved population (SA\_RM\_2\_T15) carried three and four copies chrIX copies  
17 respectively based on the frequencies of heat-sensitive clones. This is roughly in agreement with  
18 the estimates based on the sequencing depth analysis (Figure 2C). All the SA clones with extra  
19 chrIX copies carried the *TOR1* Ser1972Ile heterozygous driver mutation. Mutated *TOR1* clones  
20 carrying three copies of chrIX grew faster in RM than those with two or four copies (Mann-  
21 Whitney U-test,  $p = 6.90 \times 10^{-5}$  and  $p = 3.43 \times 10^{-3}$  respectively) (Figure 2B). To better  
22 understand the interplay between the *TOR1* Ser1972Ile mutation and the chrIX amplification, we  
23 constructed a cross grid of diploid strains with all possible combinations of *TOR1* (wild type or  
24 mutated) and chrIX copy number (2-4 copies) and estimated their doubling time (Figure 2D).  
25 Overwhelmingly, the *TOR1* Ser1972Ile mutation is the major contributor to RM resistance  
26 (53.2% and 56.1% of doubling time reduction for heterozygous and homozygous mutation  
27 respectively), with extra chrIX copies being marginally beneficial in the *TOR1* Ser1972Ile clones.  
28 In sharp contrast to RM selection, isogenic populations propagated under HU almost uniformly  
29 failed to generate and maintain detectable *de novo* variants. No *de novo* driver mutations were  
30 detected in WE, WA or SA populations, which probably explains the evolution failure of these  
31 populations throughout the 32-day experiment (Figures S1, S3-S4). The *RNR4* mutations  
32 (Arg34Ile and Lys114Met) were detected in the NA background. The clones carrying these  
33 mutations in heterozygous state showed a mean population doubling time reduction of 31.8%.

1 This adaptive gain was directly comparable to those of NA endpoint populations, and thus  
2 capable of fully explaining their adaptive gains. (Figure S4B).

3

#### 4 *De novo* mutations in *TOR1*, *TOR2* and *FPRI* drive rapamycin adaptation in heterogeneous 5 populations

6 Both *de novo* and standing variants could contribute to adaptation in the four-parent populations.  
7 Given that they were derived from four parents, the frequency spectrum of each parental allele is  
8 centered around a median frequency of 0.21 (WA), 0.26 (NA), 0.26 (WE) and 0.26 (SA) at T0  
9 (Cubillos et al., 2013). In comparison, the initial frequency of *de novo* mutations is extremely low,  
10 arising during the crossing or selection phases (Vázquez-García et al., 2017). We called *de novo*  
11 driver mutations in genes that were recurrent mutation targets in the eight four-parent populations  
12 and found that *FPRI*, *TOR1* and *TOR2* harbor such mutations (Figure 3A). Identical *FPRI*  
13 mutations occurred in all the replicated populations derived from one intercrossed population  
14 F12\_1 and the same *TOR1* mutations were found in all the replicated population derived from the  
15 other intercrossed population F12\_2; thus these drivers emerged during the shared crossing phase  
16 and then expanded independently during the selection phase. Validating this assumption, the  
17 same haplotype blocks increased in frequency in the replicated populations derived from the same  
18 intercrossed population, reflecting expansion of the same clones present at T0 (Figure S6).  
19 Similar to the isogenic lines, we found recurrent mutations at the *TOR1* 1972 and 2038 amino  
20 acid sites, further confirming that these were the primary RM selection targets and that they arise  
21 independently of the genetic context. In one population (F12\_2\_RM\_4) we also found a *TOR2*  
22 Ser1975Ile mutation rising to high frequency (Figure 3A). *TOR2* Ser1975 is located in the RM-  
23 binding domain and is paralogous to *TOR1* Ser1972, implying that RM driver targets are  
24 conserved between *TOR1* and *TOR2* (Helliwell et al., 1994). Isolation and genotyping of single  
25 clones from the population containing *TOR2* Ser1975Ile showed that heterozygous and  
26 homozygous clones co-exist. This explains its frequency higher than 0.50 in the population. The  
27 doubling time of *TOR2* homozygous mutants was significantly shorter than the heterozygous  
28 clone in RM (mean: 1.77 vs. 2.18 hours, Mann–Whitney U-test,  $p = 3.9 \times 10^{-4}$ ). The doubling  
29 time of all the other genotyped mutants, including *TOR1* Ser1972Asn (1.95 hours), Ser1972Arg  
30 (2.34 hours), Trp2038Ser (1.93 hours) and Trp2038Leu (1.83 hours) clones in their heterozygote  
31 states and *FPRI* Thr82Pro homozygotes (2.18 hours) was faster than that of the clones drawn  
32 from the adapted populations but not carrying these driver mutations (3.45 hours), suggesting  
33 clear phenotypic contributions from these *de novo* driver mutations.



1 In stark contrast to RM, we did not detect any *de novo* driver mutations in the four-parent  
2 populations under HU selection. Nevertheless, adaptation to HU is obvious (Figures 1B-C, S4D),  
3 and genome-wide frequency changes of parental alleles showed broad jumps at later time points  
4 (Figure S7), indicating resistant clones rising to high frequencies. We therefore conjectured that  
5 standing variation largely drove the adaptation to HU in the four-parent populations.

6

## 7 **Standing variation provides multiple selection targets to drive adaptation in heterogeneous** 8 **populations**

9 We next investigated how the standing variation in the four-parent populations contributed to RM  
10 and HU adaptation. We searched for genomic regions (quantitative trait loci, QTLs) with a  
11 consistent change in the frequency of one or more alleles across both time points and replicated  
12 populations. At later time points (T4 to T15), we observed strong shifts of allele frequencies over  
13 large genomic regions, reflecting drug-resistant clones rising to high frequency in both selection  
14 regimes (Figures S7-S8). Therefore, we analyzed allele frequency changes before the clones arose  
15 (T0-T4 for HU and T0-T2 for RM) to map QTLs using 99% and 95% quantiles cut-offs (see  
16 Materials and Methods).

17 In HU, two QTLs passed the 99% quantile cut-off and seven more QTLs passed the 95% cut-off  
18 (Figure 4A and Table 1) with a median size of 22 kb and containing on average 10 genes. The  
19 peak of one strongest QTL (chrVII: 841~863 kb) coincided with the location of the *RNR4* gene,  
20 encoding the small subunit of ribonucleotide-diphosphate reductase that is inhibited by HU. The  
21 *RNR4<sup>WE</sup>* allele was selected over the other three parental alleles throughout the selection  
22 experiment (Figure 4B-C). We experimentally validated the selective advantage of the *RNR4<sup>WE</sup>*  
23 allele by reciprocal hemizyosity (Warringer, Liti, & Blomberg, 2017), finding it to account for  
24 an 11.7% of doubling time reduction in the NA/WE diploid background in HU (Figures 4D, S5A-  
25 B). This corresponds to ~50% the total doubling time reduction in HU-adapted four-parent  
26 populations. The other strong QTL (chrIV: 503~563 kb) encompassed the highly pleiotropic  
27 *ENAI*, *ENA2*, and *ENA5* transporter genes (Warringer et al., 2011) with the SA allele driving  
28 towards fixation in all replicate populations (Figure S9). Four of the seven QTLs passing the 95%  
29 quantile showed continuous allele frequency changes until the end of the selection (Table S5,  
30 Figure S9) while the allele frequency changes of the other three QTLs wore off before the end of  
31 selection. Given that there were no detectable *de novo* driver mutations, the latter was probably  
32 due to overwhelming competition from clones carrying the beneficial versions of the stronger  
33 QTLs (e.g. *RNR4<sup>WE</sup>*, *ENA<sup>SA</sup>*).

1 Similarly, we mapped QTLs for RM resistance by analyzing allele frequency changes from T0 to  
2 T2. We identified four QTLs at the 99% quantile cut-off (Table 1, Figure S10A). The two  
3 strongest QTLs (52 and 26 kb respectively) covered the *TOR1* and *TOR2* genes respectively.  
4 Interestingly, the WE and SA alleles of *TOR1* and *TOR2* showed opposite allele frequency  
5 changes: *TOR1*<sup>SA</sup> and *TOR2*<sup>WE</sup> were selected for while *TOR1*<sup>WE</sup> and *TOR2*<sup>SA</sup> were selected against  
6 (Figure 5A). We validated such parental-specific allele preference by reciprocal hemizyosity  
7 (Figures 5B, S5C-D). Clones carrying the strong *TOR1*<sup>SA</sup> showed significantly shorter doubling  
8 time and higher yield than the ones with the weak *TOR1*<sup>WE</sup> allele (Mann–Whitney U-test,  $p = 3.1$   
9  $\times 10^{-4}$  and  $p = 1.5 \times 10^{-4}$  respectively). Clones carrying strong *TOR2*<sup>WE</sup> allele showed significantly  
10 higher yield than clones carrying *TOR2*<sup>SA</sup> (Mann–Whitney U-test,  $p = 1.5 \times 10^{-4}$ ). Nine additional  
11 QTLs passed the 95% quantile cut-off. While we have not experimentally validated their effects,  
12 we considered *SNQ2*, *NPR3*, *KOG1* and *CFT8* to be strong candidates for driving these QTLs  
13 based on previous studies. Among them, *CFT8* also contributed to RM resistance in the two-  
14 parent populations (Vázquez-García et al., 2017). *SNQ2* encodes a multi-drug resistance ABC  
15 transporter, and *NPR3* and *KOG1* act together with TOR in nutrient signaling. Several other  
16 QTLs were in subtelomeric regions, with the one at chrXI-R containing the subtelomeric genes  
17 *YKR103W* and *YKR104W* that encode multi-drug resistance-associated proteins (Mason,  
18 Mallampalli, Huyer, & Michaelis, 2003). Based on the end-to-end genome assemblies of the four  
19 parental strains (Yue et al., 2017), we found that these two subtelomeric genes were absent in the  
20 WE subtelomere, potentially explaining its dramatic allele frequency decrease. The strong RM  
21 QTLs such as *TOR1*, *TOR2*, *NPR3*, *CTF8* and *SNQ2* persisted until late time point in RM (Tables  
22 1 and S5, Figure S9), despite the frequency increase of clones carrying *de novo* driver mutations.  
23

#### 24 **Shared selection targets between standing and *de novo* variants in *RNR4*, *TOR1* and *TOR2***

25 The multi-hit *de novo* mutations and QTLs identified in the same genes (*RNR4* in HU and *TOR1*,  
26 *TOR2* in RM) showed a pattern of selection on shared molecular targets over short and long  
27 evolutionary timescales. To understand why this pattern arose, we compared the standing variants  
28 with *de novo* mutations identified in isogenic, two-parent and four-parent populations (Table 2).  
29 The HU-resistant *RNR4*<sup>WE</sup> allele had a single derived amino acid change, Ala161Thr, located  
30 within the ribonucleotide reductase domain; this substitution was predicted to be functional  
31 critical by sequence conservation analysis (see Materials and Methods). The *RNR4* *de novo* driver  
32 mutations emerging in both NA and two-parent populations were in the same domain but the  
33 exact sites differed (Arg34Ile, Arg34Gly, and Lys114Met). All the *de novo* mutations in the

1 *TOR1*, *TOR2* paralogs occurred in the highly conserved RM-binding domain, where they  
2 prevented the binding of the FKBP12-RM complex and thereby conferred RM resistance. In  
3 sharp contrast, none of the *TOR1* and *TOR2* standing variants mapped in the RM-binding domain  
4 and occurred outside any characterized functional domains with the exception of *TOR1*<sup>WE</sup>  
5 Phe1640 (Table 2). Three derived amino acid changes were unique to the weak *TOR2*<sup>SA</sup> allele  
6 (Glu122Gly, Ile1369Met, Ile1872Leu) and were all predicted to be deleterious (Table 2). To  
7 expand our understanding of natural genetic variation of these shared selection targets, we  
8 compared the sequences of *RNR4*, *TOR1* and *TOR2* across >1,000 *S. cerevisiae* natural isolates  
9 (<http://1002genomes.u-strasbg.fr/>). All the three genes were well conserved (Figure S11). A total  
10 of 9, 79 and 73 amino acid sites of *RNR4*, *TOR1* and *TOR2* respectively were predicted to be  
11 functionally critical, based on sequence conservation (Table S6). All nine *RNR4* sites were in the  
12 ribonucleotide reductase domain in which the standing and *de novo* variants driving HU  
13 adaptation were located. About 38.0% (30/79) of the amino acid sites in *TOR1* and 46.6% (34/73)  
14 in *TOR2* were located in known domains, including four *TOR1* and two *TOR2* sites in the RM-  
15 binding domain. We experimentally confirmed that natural alleles *TOR1* His2000 and *TOR2*  
16 Leu2047 in the RM-binding domain conferred RM resistance (Figure S5E). This adds additional  
17 support to that drug resistance can emerge through selection on existing natural variants that  
18 prevent drug binding, with no need for *de novo* mutations to emerge.

19 Given that the *TOR1*, *TOR2* standing and *de novo* variants often co-existed in the same  
20 population, we further investigated their potential interactions. We genotyped the local genetic  
21 background of *TOR1* *de novo* mutant clones drawn from different endpoint populations and found  
22 their background genotypes can be different, i.e. the *TOR1* *de novo* mutations had arisen on  
23 different clones (Table S4). Thus, *TOR1* mutations conferred strong adaptive gains across  
24 different clone backgrounds. This lack of a specific interplay between *TOR1* *de novo* driver  
25 mutations and their genetic background is consistent with the observation that *TOR1* *de novo*  
26 mutations also emerged and reached high frequency in all the isogenic populations. The interplay  
27 between *TOR2* mutations and their genetic background is particularly evident in a *TOR2* clone  
28 from population F12\_2\_RM\_4. This clone carried the weak *TOR2*<sup>SA</sup> allele, whose frequency  
29 dropped from 0.29 (T0) to 0.04 (T8). However, the frequency was nevertheless enough for one  
30 *TOR2*<sup>SA</sup> clone to acquire a compensatory *TOR2* Ser1975Ile mutation in a heterozygote state.  
31 Consequently, the growth performance drastically increased and the *TOR2*<sup>SA</sup> allele frequency was  
32 driven to 0.46 at the end of selection (Figure S12B). Thus, the emergence of this *de novo* *TOR2*  
33 mutation in the *TOR2*<sup>SA</sup> allele compensated for the sensitivity of the *TOR2*<sup>SA</sup> allele by preventing

1 RM binding. This indicated that standing and *de novo* variants of TOR probably act towards RM  
2 resistance via distinct mechanisms.

3

#### 4 **Functional consequences of TOR natural variants**

5 *TOR1* and *TOR2* are master regulators of growth, controlling yeast performance in many  
6 environments of relevance to industry, particularly in alcoholic beverage production. In this  
7 industrial context, we were particularly intrigued by the opposite RM resistance phenotype of the  
8 SA and WE *TOR1*, *TOR2* alleles, as they occur in two lineages independently domesticated for  
9 alcoholic beverage production (Fay & Benavides, 2005). We therefore further characterized the  
10 *TOR1* and *TOR2* alleles in these two genetic backgrounds to determine their respective impact on  
11 yeast performance in environments of industrial and medical interest. Potentially, such benefits  
12 could also explain their distinct evolutionary trajectories.

13 First, given the role of TOR Complex 1 (TORC1) in regulating chronological life span (CLS)  
14 (Powers, 2006), we measured the impact of TOR variants on CLS in presence and absence of  
15 RM. In RM, the *TOR1<sup>SA</sup>* and *TOR2<sup>WE</sup>* alleles had antagonistic effects on birth and death rates,  
16 conferring faster growth and shorter CLS (Figure 5A-C). The wild type WE/SA carrying both  
17 copies of TOR had the shortest CLS and the shortest doubling time in RM, indicating *TOR1* and  
18 *TOR2* haplo-proficiency for CLS and haplo-insufficiency for growth in the hemizygous deletion  
19 strains. In the absence of RM, there was almost no difference in CLS between strains, indicating  
20 that the haplo-proficient effect of single copy *TOR1* and *TOR2* already saturated in rich synthetic  
21 medium.

22 Next, to understand the effects of *TOR1*, *TOR2* standing variants on TORC1 activity, we used a  
23 highly specific commercial antibody to measure phosphorylation of the ribosomal protein S6  
24 (Rps6) under RM exposure. Rps6 phosphorylation is regulated by TORC1 and used as a specific  
25 *in vivo* assay for TORC1 activity (González et al., 2015). Rps6 phosphorylation increased in  
26 strains with the strong *TOR1<sup>SA</sup>* and *TOR2<sup>WE</sup>* alleles (Figure 5D). Thus, the SNPs distinguishing  
27 these alleles enhance TORC1 activity. This was quite surprising, first because a majority of SNPs  
28 in these alleles occur outside functional domains and second because not even mutations in the  
29 RM-binding domain affect TORC1 activity (González et al., 2015). This further underscored that  
30 the standing and *de novo* variants of *TOR1* and *TOR2* cause RM resistance by distinct  
31 mechanisms.

32 RM is an unlikely selection pressure on natural yeast alleles; however, real ecological constraints  
33 such as nitrogen limitation do affect cell growth in a TOR-dependent functions (Loewith & Hall,

1 2011) and is of central importance in wine fermentations. To further explore opposing *TOR1*,  
2 *TOR2* allele preferences between SA and WE backgrounds and illuminate the underlying  
3 mechanism, we measured their effect on doubling time in 18 relevant environments, including  
4 nitrogen-limitations and synthetic wine must (Figure 5E). As expected, the WE strain grew the  
5 fastest in synthetic wine must, consistent with its niche-specific domestication history. Overall,  
6 the removal of one *TOR* allele tended to result in growth defects in nitrogen-limited  
7 environments, and the removal of a WE allele was generally worse than the removal of a SA  
8 allele. For example, hybrids carrying *TOR1<sup>WE</sup>* grow faster than those carrying *TOR1<sup>SA</sup>* on  
9 methionine and threonine; and hybrids with *TOR2<sup>WE</sup>* grow faster than those with *TOR2<sup>SA</sup>* in  
10 tryptophan, threonine, serine, methionine, isoleucine, asparagine and adenine.  
11 Finally, we investigated *TOR* gene essentiality in SA, WE, WA and NA genetic backgrounds by  
12 knocking out *TOR1* or *TOR2*. Previous studies in the laboratory strain S288C showed that *TOR1*  
13 was non-essential, whereas *TOR2* was essential (Liu et al., 2015; Winzeler et al., 1999). As  
14 expected, *TOR2* could not be deleted in WE, NA or WA. Surprisingly, however, we successfully  
15 deleted the *TOR2* gene in the SA haploid. The *tor2Δ* SA strain was able to grow on synthetic  
16 complete medium (SC), although with marked growth defects, but not on YPD (Figures 6A-B).  
17 Because the TORC1 activity of *tor2Δ* SA remained unaltered upon RM treatment (Figure 6C),  
18 the SA background is either able to make up for the *TOR2* loss by compensatory induction or by  
19 complex incorporation of *TOR1*, or do not use *TOR2* in TORC1 at all. We further dissected ~900  
20 spores from WE/SA *TOR2* reciprocal hemizygous deletions, as well as WE/SA wild type on both  
21 YPD and SC medium. On SC, the spore viability was 83.5% for the homozygote *TOR2* cross and  
22 55.3% for the hemizygote cross. Thus, *TOR2* was essential in a fraction of the recombined  
23 WE/SA offspring. By tracking the deletion marker, we estimated that 18.5% of the *tor2Δ* spores  
24 carrying recombinants survived on SC (Table S7), although with large growth defects (Figure  
25 6D). No *tor2Δ* spores were viable on YPD. Therefore, *TOR2* was conditionally essential,  
26 depending on both genetic background and growth condition. The conditional essential phenotype  
27 was usually regulated by complex genetic interactions, relying on multiple background-specific  
28 modifiers (Dowell et al., 2010). Tetrad segregation patterns suggested that there were at least two  
29 distinct loci contributing to *TOR2* dispensability (Table S8). Taken together, the divergent  
30 functions of the WE and SA alleles on *TOR1* and *TOR2* alleles impacted not only on RM  
31 resistance but also on chronological aging, TORC1 activity, nitrogen control of growth and  
32 essentiality. This may reflect the independent domestication histories of the two SA and WE  
33 lineages for specific purposes (Fay & Benavides, 2005).  
34

## 1 Discussion

2 We devised an experimental system with two (Parts et al., 2011) and four (Cubillos et al., 2013)  
3 parent intercrossed yeast populations to quantify how increasing levels of standing variation  
4 affect adaptation dynamics and to understand whether standing and *de novo* variants are selected  
5 in shared target genes. To maximize the genetic and phenotypic diversity, the four-parent  
6 populations were derived from intercrosses of four *S. cerevisiae* genetic backgrounds  
7 representative of independent evolutionary histories that were isolated from four different  
8 continents and ecological niches (Liti et al., 2009). The heterogeneous populations framework  
9 generated millions of individuals with unique haplotype combinations and has enabled high  
10 sensitivity and resolution QTL mapping (Burke et al., 2014; Cubillos et al., 2013; Illingworth,  
11 Parts, Schiffels, Liti, & Mustonen, 2012; Parts et al., 2011; Vázquez-García et al., 2017). Here the  
12 higher genetic heterogeneity translated into higher fitness variance which is a prerequisite for  
13 faster genetic adaptation (Jerison et al., 2017). The genetically diverse populations exploited on  
14 this variation to achieve larger and faster adaptive gains. We found that a doubling of the  
15 segregating genetic diversity (from 1/230 to 1/120 segregating sites/bp) increased RM adaptive  
16 gains by 51.5% and HU adaptive gains by 64.1% in the absence of *de novo* mutations.  
17 Undoubtedly, a continuum of genetic diversity and a large ensemble of environments are required  
18 for precise models of adaptation as a function of genetic variation. Nevertheless, these parameter  
19 estimates provide a starting point for placing the evolutionary theory of standing variation on a  
20 sound empirical basis. In terms of practical implications, this study also underscores the  
21 importance of minimizing the genetic variation of infections and tumors to maximize success  
22 rates when treating clonal evolutionary diseases.

23 Allele frequency dynamics in the four-parent populations revealed localized directional changes  
24 (QTLs) driving the early acceleration adaptation. The surprisingly high number of QTLs (13 in  
25 RM, 9 in HU) vastly exceeded the single QTL (*CTF8* in RM) mapped in the two-parent  
26 populations. The difference was partially a matter of new alleles being available in the four-  
27 parent populations: the largest effect QTLs (*RNR4*, *TOR1* and *TOR2*) were driven by WE and SA  
28 alleles that were not present in the two-parent populations. However, other four-parent QTLs  
29 corresponded to WA and NA alleles that were also present but not selected in the two-parent  
30 populations. Their lack of expressivity in the two-parent populations directly points to  
31 dependence on complex interactions conditioned by the higher genetic heterogeneity (Burke et al.,  
32 2010).

33 Towards the mid and later phase of selection, highly resistant clones emerged and arose to high  
34 frequency in both HU and RM. Nevertheless, the genetic make-up and origin of these clones

1 differed dramatically between the two selection regimes. Standing variants appeared to drive HU  
2 adaptation all the way to the end, implying that beneficial *de novo* mutations are either too rare or  
3 too weak to compete against the bulk dynamics driven by the standing beneficial alleles (i.e. the  
4 nine QTLs). It could also be partially explained by negative or sign epistasis weakening the  
5 effects of beneficial *de novo* alleles (Khan, Dinh, Schneider, Lenski, & Cooper, 2011). An  
6 additional explanation is that the *RNR* driver mutations appear to be strongly background  
7 dependent. This is evident from the isogenic populations, with only one background (NA) that  
8 acquired *RNR4* mutations and evolved. In contrast, mid to late adaptation to RM was consistently  
9 driven by clones with *de novo* mutations in *TOR1*, *TOR2* and *FPR1* emerging and overtaking  
10 other competing bulk subpopulations. This was consistently true in all genetic contexts and at all  
11 levels of standing variation. These highly penetrant *de novo* mutations in members of the TOR  
12 pathway have long been known to prevent their interaction with RM (Heitman et al., 1991;  
13 Helliwell et al., 1994), which is manifested again by our experiments.

14 In the widest sense, we found strong examples of convergent selection on standing and *de novo*  
15 variants to confer RM resistance – *TOR1* and *TOR2*. This was not given *a priori*. First, strong  
16 loss-of-function *de novo* variants often play an outsized role under adaptation to a single  
17 constrained selective pressure (Hottes et al., 2013). However, such mutations are not likely to  
18 prevail in natural populations, because purifying selection acts to remove variants that impair  
19 gene functions (Bamshad & Wooding, 2003). Second, many standing variants in natural  
20 populations may not emerge *de novo* because the underlying mutation events are too rare. The  
21 convergence on selection on both standing and *de novo* variants of *TOR1* and *TOR2* is  
22 particularly intriguing. *De novo* and standing variants conferred RM resistance via distinct  
23 mechanisms: abolishing drug binding by *de novo* variants (Loewith & Hall, 2011) and altering  
24 the TORC1 activity by standing variants. Underscoring this mechanistic distinction, a driver  
25 mutation in the drug-binding domain completely rescued the low TORC1 activity of the weak  
26 *TOR2<sup>SA</sup>* allele. Moreover, the *TOR2 de novo* mutation is much rarer (only one single instance  
27 among all the populations of isogenic, two-parent and four-parent) despite its drug binding  
28 domain having a similar target size as *TOR1* and the *TOR1*, *TOR2* paralogs being thought to be  
29 redundant in terms of RM resistance (Loewith & Hall, 2011). The most parsimonious explanation  
30 for this drastic difference is that *TOR2* is under stronger selection constraints likely reflecting its  
31 unique, essential role in the TOR complex 2 (TORC2).

32 The standing WE and SA variants of *TOR1* and *TOR2* have opposite effects on RM resistance,  
33 reflecting lineage-specific functional divergence after the gene duplication in their shared  
34 ancestor. Although we cannot stringently reject a purely neutral explanation, the directly

1 opposing effects of these alleles on growth and survival corresponds to an evolutionary trade-off  
2 between the two key determinants of fitness and makes it tempting to invoke selection to explain  
3 this divergence. Domestication to distinct human made niches (Sake and grape-wine), including  
4 different substrates of fermentation (Giudici & Zambonelli, 1992; Sasaki et al., 2014), may be the  
5 ultimate explanation for this divergence with drug resistance as a side-effect caused by TOR  
6 pleiotropy. More broadly, this is reminiscent of methicillin-resistant and penicillin-resistant  
7 strains emerging long before the introduction of these antibiotics in the clinic because of other  
8 irrelevant selections (Baker et al., 2014; D’Costa et al., 2011; Harkins et al., 2017).  
9 Recent studies have implicated intratumoral heterogeneity as a significant driver of drug  
10 resistance, bearing big challenges to chemotherapy (Saunders et al., 2012). Both of the two key  
11 findings in this study: the acceleration of adaptation by higher standing variation; and the shared  
12 targets between standing and *de novo* variants have important implications on our understanding  
13 of drug resistance evolving and treatment development (McGranahan & Swanton, 2017). In  
14 particular, accurately measuring intratumoral heterogeneity and the clonal fitness distribution will  
15 become essential for more successful therapies in the near future.  
16

## 17 **Materials and Methods**

### 18 **Experimental evolution and genome sequencing**

19 We previously performed two independent intercrosses to generate the F12 populations (four-  
20 parent populations – F12\_1 and F12\_2) that were derived from four diverged parents:  
21 DBVPG6044 (West Africa, “WA”), DBVPG6765 (Wine European, “WE”), Y12 (Sake, “SA”) and  
22 YPS128 (North America, “NA”). The strain information is listed in Table S9. Here  
23 experimental evolution was initiated from random subsamples of F12\_1 and F12\_2, with each  
24 subsample comprised of  $10^7$  - $10^8$  cells. In parallel, experimental evolution was also initiated from  
25 clonally expanded, near isogenic parental populations of similar size. Cells were evenly spread on  
26 YPD agar plates (2% peptone, 1% yeast extract, 2% glucose, 2% agar) with hydroxyurea (10  
27 mg/ml) or rapamycin (0.025  $\mu$ g/ml), and incubated at 23°C. Every 2-3 days, all the cells were  
28 collected from each plate into 1 ml distilled water. Ten percent of the cell suspension was  
29 transferred to a freshly made plate while the rest were kept in 25% glycerol at -80°C. The  
30 selection experiment lasted for 32 days. The detailed timeline and population specifics are listed  
31 in Tables S1-S2. For each drug, there are four independently evolving replicates derived from  
32 F12\_1 and F12\_2 respectively, as well as two replicates for each of the four parents. Besides,



1 there were two replicates derived from F12\_1 and F12\_2 respectively using drug-free YPD as  
2 control. Procedures were identical to those used for generating and evolving the previously  
3 published two-parent population (Vázquez-García et al., 2017). DNA was extracted from  
4 populations of T0, T1, T2, T4, T8 and the last transfer using “Yeast MasterPure” kit (Epicentre,  
5 USA). The samples were sequenced with Illumina TruSeq SBS v4 chemistry, using paired-end  
6 sequencing on Illumina HiSeq 2000/2500 at the Wellcome Trust Sanger Institute. Sequence data  
7 is deposited to NCBI SRA database with accession number for BioProject PRJEB4645.

8

### 9 **Sequence alignment, calling segregate genotypes and identification of *de novo* mutations**

10 Short-read sequences were aligned to the *S. cerevisiae* S288C reference genome (Release R64-1-  
11 1). Sequence alignment was carried out with Stampy v1.0.23 (Lunter & Goodson, 2011) and local  
12 realignment using BWA v0.7.12 (Li & Durbin, 2009). We used SAMtools v1.2 (Li, 2011) to  
13 count the number of reads reporting parental alleles at the segregating sites (Cubillos et al., 2013).  
14 We performed *de novo* mutation calling for each sequenced sample using three different  
15 algorithms: GATK 2.1-5-gf3daab0 (DePristo et al., 2011), Platypus v0.7.9.1 (Rimmer et al., 2014)  
16 and SAMtools v1.2 (Li, 2011). We then filtered these calls by subtracting all variation called  
17 from the parental samples to remove standing variation, required each variant to be on a locus  
18 with more than ten reads and more than six reads reporting the variant allele, and to pass default  
19 filters of the algorithms. For Platypus we allowed allele bias flagged calls as the sequenced  
20 samples are pools and therefore can have a range of variant allele fractions. We then intersected  
21 the calls and required that at least two of the methods called it. For the confirmed driver  
22 mutations at the end time point, we further tracked their frequency across previous time points.  
23 Finally, we used Ensembl Variant Effect Predictor to annotate the mutations (McLaren et al.,  
24 2016).

### 25 **Estimating allele frequencies**

26 We define the allele frequency  $x_i^j$  at locus  $i$  of an allele  $j$  in the cross, e.g. we define  $x_i^{\text{WA}}$  to refer  
27 to the frequency of the WA allele at locus  $i$  (and so on for  $j \in \{\text{WA}, \text{NA}, \text{WE}, \text{SA}\}$ ). The allele  
28 frequency at locus  $i$  is normalized, such that  $x_i^{\text{WA}} = 1 - \sum_{j \in \{\text{NA}, \text{WE}, \text{SA}\}} x_i^j$ . Given the number of  
29 reads  $n_i^j$  mapping to each allele and the total number of reads at each segregating locus, we  
30 estimated the allele frequency using the filterHD algorithm (Fischer, Vázquez-García,  
31 Illingworth, & Mustonen, 2014). filterHD fits a jump-diffusion process to the data where the  
32 diffusion component models the persistence of allele frequencies along the genome, reflecting

1 linkage disequilibrium of nearby loci. Conversely, the jump component allows sudden changes in  
2 the allele frequency, which reflects the genotype state of large clones in populations that became  
3 clonal during the experiment.

4

#### 5 **Estimating copy number variation**

6 Sequencing depth was calculated by “samtools depth” and then used to calculate the median  
7 sequencing depth ( $x$ ) for each chromosome. For the isogenic SA populations, we measured the z-  
8 score =  $(x - \mu) / \sigma$ , here  $\mu$  and  $\sigma$  is the mean and standard deviation of sequencing depth of each  
9 population.

10

#### 11 **Mapping quantitative trait loci (QTLs)**

12 Given our allele frequency estimates, we used a 10-kb sliding window with a 2-kb step size to  
13 localize quantitative trait loci (QTLs). For each heterogeneous population, we compared the allele  
14 frequency change in a window  $i$  between time point  $t$  and T0 (e.g.  $\Delta x_i^j(t) = x_i^j(t) - x_i^j(0)$ ,  
15  $j = \{\text{WA, NA, WE, SA}\}$ ). If there is selection on standing variation, the absolute frequency change  
16 of a parental allele in regions under selection is expected to be higher than in neutral regions and  
17 to increase gradually as selection proceeds. On this basis, for each earlier transfer, we calculated  
18 z-score of allele frequency changes compared with T0 in each population:  $z_{\Delta x} = (\Delta x_i^j -$   
19  $\mu_{\Delta x}) / \sigma_{\Delta x}$ . Here,  $\mu_{\Delta x}$  and  $\sigma_{\Delta x}$  are the mean and standard deviation of  $\Delta x_i^j$  in all the four-parent  
20 populations evolved in the drug at a certain time point. The z-score square reflects the allele  
21 frequency deviation from T0. Given the fact that we observed dominant clones at later phase, we  
22 only used earlier phase to map QTLs: T0 to T4 for HU and T0 to T2 for RM. This cut-off is  
23 determined by the patterns of allele frequency distribution (Figure S8). Without dominant  
24 clone(s), the allele frequency distribution of all the four parental lineages follows a normal  
25 distribution with mean of  $\sim 0.25$ . If dominant clone(s) appear and greatly deplete the genetic  
26 heterogeneity of the population, the distribution pattern would change dramatically, such as the  
27 ones shown at later time points with two or more peaks of frequencies largely deviated from 0.25.  
28 We searched for regions with z-score square higher than 99% or 95% quantile for each earlier  
29 time point. If the regions were able to pass the cut-off at T1, T2 for RM and at T1, T2, T4 for HU,  
30 and not pass the same cut-off in control (drug-free condition), they are assumed to be QTLs  
31 (Figures 4A and S10, Table 1). We excluded regions located near chromosome ends, which could  
32 be false positives due to repetitive sequences. The discrepancy of QTL numbers between the two-  
33 parent and the four-parent populations cannot be attributed to the different approaches to perform

1 QTL mapping because when applying the same approach described here to the two-parent data,  
2 only few weak QTLs were mapped (Figure S13) including *CTF8*.  
3 QTLs could be either maintained until later time points or be hijacked by the spread of clones  
4 with beneficial mutations. We define whether a QTL is maintained by counting the replicates in  
5 which the strong allele keeps increasing or the weak allele keeps decreasing until T4, T8 and the  
6 end. If the number of such replicates is more than six (of a total of eight), we defined the QTL as  
7 maintained until the later time points (Figure S9, Tables 1 and S5).

8

## 9 **Growth phenotyping**

### 10 ***Quantitative measurement***

11 We randomly selected thousands of isolates from the initial and final populations (Table S2), bulk  
12 population from the isogenic, two-parent and four-parent populations at each serial transfer of the  
13 experimental evolution (Table S1) and strains with gene deletion (Table S9) for phenotyping.  
14 Using a high-resolution large-scale scanning platform, Scan-o-matic, we monitored growth in a  
15 1536-colony design on solid agar plate (Zackrisson et al., 2016). High-quality desktop scanners  
16 monitored the colonies growth on synthetic complete medium (0.14% YNB, 0.5% ammonium  
17 sulphate, 0.077% Complete Supplement Mixture (CSM, ForMedium), 2% (w/v) glucose and pH  
18 buffered to 5.8 with 1% (w/v) succinic acid) with drugs (10 mg/ml hydroxyurea, 0.025 ug/ml  
19 rapamycin), and without drug as control. The medium of nitrogen-limited environments to test  
20 the TOR variants used a single nitrogen source present at 30 mg nitrogen/l (Ibstedt et al., 2015).  
21 Experiments were run for 3 days and scans were continuously performed every 20 minutes. After  
22 filtering steps for quality check, doubling time was extracted for downstream analysis in R (R  
23 version 3.4.1). Technical replicates ( $n$ ) are substantial:  $n \geq 8$  for each sample in drug condition;  $n$   
24  $\geq 2$  in drug-free condition;  $n \geq 96$  for the samples phenotyped in nitrogen-limited conditions.

25 We also used the Tecan Infinite 200 PRO plate reader to measure growth curves in small scale.  
26 We pre-cultured the cells overnight and diluted the saturated culture 100 times into fresh medium.  
27 We measured OD<sub>600</sub> every 15 minutes for at least 3 days in drugs and control. The raw OD<sub>600</sub>  
28 values were corrected and then used to generate growth curves. Doubling time and yield were  
29 extracted using the online tool “PRECOG” (Fernandez-Ricaud, Kourtchenko, Zackrisson,  
30 Warringer, & Blomberg, 2016).

### 31 ***Qualitative measurement***

32 We did serial dilution and spotting of the cells to visualize the adaptation on population level  
33 visually (Figure S1) as well as the growth phenotypes of gene deletions (Figure S5). Cells were

1 pre-cultured in YPD overnight to saturation. Then 5  $\mu$ l of the culture was taken to do spotting  
2 assay in the condition of interest. There were a total of six 1:10 dilutions from left to right on the  
3 plate.

4 We also did spotting assay of 48 isolates drawn from the SA population evolved in RM  
5 (SA\_RM\_2\_T15) in heat condition (40°C). We pre-cultured cells in YPD overnight. Then 5  $\mu$ l  
6 cells of 1,000-fold dilution from saturation were taken to put on YPD and incubated at 40°C. The  
7 plates were scanned after two days.

#### 8 **Chronological Life Span (CLS) measurement**

9 Strains used for CLS measurement were thawed from -80°C and grown on YPD plate. Single  
10 colonies were picked and pre-cultured in 1 ml synthetic complete (SC) medium (0.675% YNB,  
11 0.0875% complete powder, 2% glucose) overnight until saturation. Then the cells were mixed  
12 well and 5  $\mu$ l overnight culture was transferred to 200  $\mu$ l SC and 200  $\mu$ l SC + rapamycin (0.025  
13  $\mu$ g/ml) in 96-well plate, which was sealed with aluminum foil and kept in an incubator at 30 °C.  
14 Each strain has four replicates. After 3 days, red fluorescent dye propidium iodide (PI) was used  
15 to stain the dead cells and green fluorescent dye YO-PRO was used to stain apoptotic cells.  
16 Double staining dyes were diluted in PBS at a final concentration of 3  $\mu$ M for PI and 200nM for  
17 YO-PRO. Cells were well suspended by pipetting and 5  $\mu$ l culture was transferred to 100  $\mu$ l PBS  
18 with PI and YO-PRO, stained at 30°C for 10 minutes. Flow cytometry analysis was performed on  
19 the BD FACSCalibur system. Excitation was performed using a laser at 488 nm and emission was  
20 detected in FL1 and FL3 using the standard filter configuration. The first measurement was  
21 termed as Day0. After that, every 3-4 days, we used the same protocol to stain cells and measure  
22 viability.

23

#### 24 **Quantitative PCR (qPCR) to confirm the chrIX copy number variation**

25 In order to validate the chrIX copy number changes of the SA clones evolved from RM evolved  
26 population, we performed qPCR with StepOnePlus™ Real-Time PCR System. Primers were  
27 designed on both sides of the chrIX centromere to validate chrIX copy number changes. Another  
28 pair of primers was designed within an essential gene located on chrI (Table S10) as control. We  
29 made a standard curve ( $R^2 = 0.99$ ) for each pair of primers and melting curves of each qPCR  
30 product to make sure of amplifications specificity. DNA template was prepared using “Yeast  
31 MasterPure” kit (Epicentre, USA). Each qPCR reaction has three replicates using the FastStart  
32 Universal SYBR Green Master (Rox). We also used the SA wild type diploid as control. We used  
33  $\Delta\Delta$ Ct method (Schmittgen & Livak, 2008) to analyze data to determine whether there are chrIX  
34 copy number changes.

1

## 2 **Cross grid experiment**

3 We isolated diploid SA clones from a RM-evolved population at T15. We validated the copy  
4 number of chrIX (three or four copies), induced sporulation (in 2% KAc) and dissect spores. We  
5 genotyped the spores of the mating type, *TOR1* mutation or wild type and chrIX copy number  
6 (one or two copies). With these genotypes, we crossed spores to create an array of diploids where  
7 all possible genotypes were combined (Figure 2D).

8

## 9 **Reciprocal hemizyosity**

10 Gene deletion was performed using LiAc/SS carrier DNA/PEG method (Gietz & Schiestl, 2007).  
11 Reciprocal hemizyosity analysis (Warringer et al., 2017) was performed in the hybrids derived  
12 from two of the four parents. We tried several times to construct *RNR4* reciprocal hemizygotes in  
13 the hybrids with WE allele (WE/NA, WE/WA and WE/SA) to confirm the function of strong  
14 allele (WE). Finally, we obtained complete reciprocal hemizygotes in WE/NA but incomplete in  
15 WE/WA and WE/SA (only WE allele deleted, but not WA or SA allele deleted). We successfully  
16 constructed complete reciprocal hemizygotes for *TOR1* and *TOR2* in the WE/SA hybrid (Table  
17 S9).

18

## 19 **Measurement of TOR activity by Rps6 phosphorylation**

20 Exponentially growing cells (OD<sub>600</sub> 0.6-0.8) in SC medium were treated with rapamycin (LC  
21 laboratories) to a final concentration of 200 ng/ml. Cultures (10 ml) were centrifuged at 1800g for  
22 2 min at 4°C. The cell pellet was washed once with 500 µl cold water and stored at -80°C. Protein  
23 extraction, SDS-PAGE separation and immunoblot analyses were performed as previously  
24 described (González et al., 2015). The antibodies used in this study are: phospho-Ser235/Ser236-  
25 S6 (#2211, Cell Signaling Technology), RPS6 (#ab40820, Abcam), actin (#MAB1501,  
26 Millipore).

27

## 28 **Tetrad analysis**

29 Cells were sporulated in 2% KAc at 23°C. When at least 30% tetrads were observed under the  
30 microscope, we treated the cells in zymolase (5 mg/ml) at 30°C for 30 minutes. Then spores were  
31 dissected manually by the Singer SporePlay+ instrument. To validate the conditional essentiality  
32 of *TOR2*, both YPD medium (2% peptone, 1% yeast extract, 2% glucose, 2% agar) and SC  
33 medium (0.675% YNB, 0.0875% complete powder, 2% glucose, 2% agar) medium were used for

1 tetrad analysis. Plates were photographed after 4 days and replica plated on SC + Nourseothricin  
2 to follow the segregation patterns of knockout alleles. The absence of *TOR2* in small spores is  
3 also confirmed by PCR. The statistical approach to identify modifiers for the conditional  
4 essentiality of *TOR2* is performed based on the method described by Dowell *et. al.* (Dowell et al.,  
5 2010).

6

### 7 **Sequence analysis of >1,000 yeast strains and function predictions**

8 We reconstructed diploid pseudo-genome sequences of the 1,011 *S. cerevisiae* natural isolates by  
9 substituting the reference *S. cerevisiae* genome with the SNP calling results of the 1002 *S.*  
10 *cerevisiae* Genomes Project (Peter and De Chiara et al. under review). In the occurrence of  
11 heterozygous SNPs, we randomly distributed the two alleles into the two haploid pseudo-  
12 genomes. The first haploid pseudo-genome of each isolates was used for our downstream analysis.  
13 We extracted the CDS regions of the *RNR4*, *FPRI*, *TOR1* and *TOR2* genes from these haploid  
14 pseudo-genome sequences based on the reference coding-region coordinates and performed  
15 sliding window analysis (window size = 60 bp, step size = 0) for the coding region of each gene  
16 to calculate the pairwise sequence diversity ( $\pi$ ) with Jukes-Cantor correction. Likewise, we also  
17 calculated the ratio of non-synonymous and synonymous substitutions (dN/dS) for each window  
18 using the “yn00” program of the PAML package (version 4.8a) (Yang, 2007). For dN/dS  
19 calculation, we used the corresponding sequences of the *S. paradoxus* strain CBS432 as out-  
20 group. The coding sequences of those four genes in CBS432 were retrieved from our previous  
21 study (Yue et al., 2017) and were aligned with their counterparts of the *S. cerevisiae* strain  
22 genomes in codon spaces using MEGA7 (Kumar, Stecher, & Tamura, 2016) with indels trimmed  
23 off. All the amino acids substitutions from the 1,011 strains were submitted online to predict the  
24 functional consequences (mutfunc.com). The Tor1, Tor2 and Rnr4 protein sequences were  
25 analyzed by SIFT (Sim et al., 2012) and the alignments were used to calculate sequence  
26 conservation (Capra & Singh, 2007).

27

### 28 **Statistical analysis**

29 The Mann–Whitney U-test was performed in R using the *wilcox.test ()* function, with two-sided  
30 alternative hypothesis. Unless otherwise stated, the doubling time mentioned in the text  
31 corresponds to the mean value of indicated samples.

32

## 1 **Acknowledgments**

2 We thank Johan Hallin for critical reading of the manuscript. This research is supported by ATIP-  
3 Avenir (CNRS/INSERM), Fondation ARC (SFI20111203947), FP7-PEOPLE-2012-CIG  
4 (322035), the French National Research Agency (ANR-13-BSV6-0006-01 and ANR-16-CE12-  
5 0019), Cancéropôle PACA (AAP emergence) and DuPont Young Professor Award to G.L., by  
6 the Wellcome Trust to I.V.-G. (WT097678) and to V.M. (WT098051), by the Swedish Research  
7 Council (325-2014-6547 and 621- 2014-4605) to J.W. J.L. is supported by Fondation ARC pour  
8 la Recherche sur le Cancer (PDF20140601375). J.-X.Y. is supported by Fondation ARC pour la  
9 Recherche sur le Cancer (PDF20150602803). B.B. was supported by La Ligue Contre le Cancer  
10 (GB-MA-CD-11287). We also acknowledge the IRCAN Flow Cytometry Facility CytoMed  
11 (supported by Conseil Général 06, FEDER, Ministère de l'Enseignement Supérieur, Région  
12 Provence Alpes-Côte d'Azur and INSERM) and the IRCAN Genomics Core Facility.

## 13 **References**

- 14 Baker, K. S., Mather, A. E., McGregor, H., Coupland, P., Langridge, G. C., Day, M., ...  
15 Thomson, N. R. (2014). The extant World War 1 dysentery bacillus NCTC1: a genomic  
16 analysis. *Lancet (London, England)*, 384(9955), 1691–1697.  
17 [https://doi.org/10.1016/S0140-6736\(14\)61789-X](https://doi.org/10.1016/S0140-6736(14)61789-X)
- 18 Bamshad, M., & Wooding, S. P. (2003). Signatures of natural selection in the human genome.  
19 *Nature Reviews Genetics*, 4(2), nrg999. <https://doi.org/10.1038/nrg999>
- 20 Barrett, R. D. H., & Schluter, D. (2008). Adaptation from standing genetic variation. *Trends in*  
21 *Ecology & Evolution*, 23(1), 38–44. <https://doi.org/10.1016/j.tree.2007.09.008>
- 22 Barrick, J. E., Yu, D. S., Yoon, S. H., Jeong, H., Oh, T. K., Schneider, D., ... Kim, J. F. (2009).  
23 Genome evolution and adaptation in a long-term experiment with *Escherichia coli*.  
24 *Nature*, 461(7268), 1243–1247. <https://doi.org/10.1038/nature08480>
- 25 Burke, M. K., Dunham, J. P., Shahrestani, P., Thornton, K. R., Rose, M. R., & Long, A. D.  
26 (2010). Genome-wide analysis of a long-term evolution experiment with *Drosophila*.  
27 *Nature*, 467(7315), 587–590. <https://doi.org/10.1038/nature09352>
- 28 Burke, M. K., Liti, G., & Long, A. D. (2014). Standing Genetic Variation Drives Repeatable  
29 Experimental Evolution in Outcrossing Populations of *Saccharomyces cerevisiae*.  
30 *Molecular Biology and Evolution*, 31(12), 3228–3239.  
31 <https://doi.org/10.1093/molbev/msu256>

- 1 Capra, J. A., & Singh, M. (2007). Predicting functionally important residues from sequence  
2 conservation. *Bioinformatics*, *23*(15), 1875–1882.  
3 <https://doi.org/10.1093/bioinformatics/btm270>
- 4 Cubillos, F. A., Louis, E. J., & Liti, G. (2009). Generation of a large set of genetically tractable  
5 haploid and diploid *Saccharomyces* strains. *FEMS Yeast Research*, *9*(8), 1217–1225.  
6 <https://doi.org/10.1111/j.1567-1364.2009.00583.x>
- 7 Cubillos, F. A., Parts, L., Salinas, F., Bergström, A., Scovacicchi, E., Zia, A., ... Liti, G. (2013).  
8 High-resolution mapping of complex traits with a four-parent advanced intercross yeast  
9 population. *Genetics*, *195*(3), 1141–1155. <https://doi.org/10.1534/genetics.113.155515>
- 10 D’Costa, V. M., King, C. E., Kalan, L., Morar, M., Sung, W. W. L., Schwarz, C., ... Wright, G.  
11 D. (2011). Antibiotic resistance is ancient. *Nature*, *477*(7365), 457–461.  
12 <https://doi.org/10.1038/nature10388>
- 13 DePristo, M. A., Banks, E., Poplin, R., Garimella, K. V., Maguire, J. R., Hartl, C., ... Daly, M. J.  
14 (2011). A framework for variation discovery and genotyping using next-generation DNA  
15 sequencing data. *Nature Genetics*, *43*(5), 491–498. <https://doi.org/10.1038/ng.806>
- 16 Dowell, R. D., Ryan, O., Jansen, A., Cheung, D., Agarwala, S., Danford, T., ... Boone, C. (2010).  
17 Genotype to Phenotype: A Complex Problem. *Science*, *328*(5977), 469–469.  
18 <https://doi.org/10.1126/science.1189015>
- 19 Fay, J. C., & Benavides, J. A. (2005). Evidence for Domesticated and Wild Populations of  
20 *Saccharomyces cerevisiae*. *PLOS Genetics*, *1*(1), e5.  
21 <https://doi.org/10.1371/journal.pgen.0010005>
- 22 Fernandez-Ricaud, L., Kourtchenko, O., Zackrisson, M., Warringer, J., & Blomberg, A. (2016).  
23 PRECOG: a tool for automated extraction and visualization of fitness components in  
24 microbial growth phenomics. *BMC Bioinformatics*, *17*, 249.  
25 <https://doi.org/10.1186/s12859-016-1134-2>
- 26 Fischer, A., Vázquez-García, I., Illingworth, C. J. R., & Mustonen, V. (2014). High-Definition  
27 Reconstruction of Clonal Composition in Cancer. *Cell Reports*, *7*(5), 1740–1752.  
28 <https://doi.org/10.1016/j.celrep.2014.04.055>
- 29 Gerrish, P. J., & Lenski, R. E. (1998). The fate of competing beneficial mutations in an asexual  
30 population. *Genetica*, *102–103*(1–6), 127–144.
- 31 Gietz, R. D., & Schiestl, R. H. (2007). Large-scale high-efficiency yeast transformation using the  
32 LiAc/SS carrier DNA/PEG method. *Nature Protocols*, *2*(1), 38–41.  
33 <https://doi.org/10.1038/nprot.2007.15>



- 1 Giudici, P., & Zambonelli, C. (1992). Biometric and Genetic Study on Acetic Acid Production for  
2 Breeding of Wine Yeast. *American Journal of Enology and Viticulture*, *43*(4), 370–374.
- 3 Gjuvslund, A. B., Zörgö, E., Samy, J. K., Stenberg, S., Demirsoy, I. H., Roque, F., ... Warringer,  
4 J. (2016). Disentangling genetic and epigenetic determinants of ultrafast adaptation.  
5 *Molecular Systems Biology*, *12*(12), 892.
- 6 González, A., Shimobayashi, M., Eisenberg, T., Merle, D. A., Pendl, T., Hall, M. N., & Moustafa,  
7 T. (2015). TORC1 Promotes Phosphorylation of Ribosomal Protein S6 via the AGC  
8 Kinase Ypk3 in *Saccharomyces cerevisiae*. *PLOS ONE*, *10*(3), e0120250.  
9 <https://doi.org/10.1371/journal.pone.0120250>
- 10 Harkins, C. P., Pichon, B., Doumith, M., Parkhill, J., Westh, H., Tomasz, A., ... Holden, M. T. G.  
11 (2017). Methicillin-resistant *Staphylococcus aureus* emerged long before the introduction  
12 of methicillin into clinical practice. *Genome Biology*, *18*, 130.  
13 <https://doi.org/10.1186/s13059-017-1252-9>
- 14 Heitman, J., Movva, N. R., & Hall, M. N. (1991). Targets for cell cycle arrest by the  
15 immunosuppressant rapamycin in yeast. *Science*, *253*(5022), 905–909.  
16 <https://doi.org/10.1126/science.1715094>
- 17 Helliwell, S. B., Wagner, P., Kunz, J., Deuter-Reinhard, M., Henriquez, R., & Hall, M. N. (1994).  
18 TOR1 and TOR2 are structurally and functionally similar but not identical  
19 phosphatidylinositol kinase homologues in yeast. *Molecular Biology of the Cell*, *5*(1),  
20 105–118.
- 21 Hermisson, J., & Pennings, P. S. (2005). Soft Sweeps. *Genetics*, *169*(4), 2335–2352.  
22 <https://doi.org/10.1534/genetics.104.036947>
- 23 Herron, M. D., & Doebeli, M. (2013). Parallel Evolutionary Dynamics of Adaptive  
24 Diversification in *Escherichia coli*. *PLOS Biology*, *11*(2), e1001490.  
25 <https://doi.org/10.1371/journal.pbio.1001490>
- 26 Hottes, A. K., Freddolino, P. L., Khare, A., Donnell, Z. N., Liu, J. C., & Tavazoie, S. (2013).  
27 Bacterial adaptation through loss of function. *PLoS Genetics*, *9*(7), e1003617.  
28 <https://doi.org/10.1371/journal.pgen.1003617>
- 29 Ibstedt, S., Stenberg, S., Bagés, S., Gjuvslund, A. B., Salinas, F., Kourtchenko, O., ... Warringer,  
30 J. (2015). Concerted Evolution of Life Stage Performances Signals Recent Selection on  
31 Yeast Nitrogen Use. *Molecular Biology and Evolution*, *32*(1), 153–161.  
32 <https://doi.org/10.1093/molbev/msu285>

- 1 Illingworth, C. J. R., Parts, L., Schiffels, S., Liti, G., & Mustonen, V. (2012). Quantifying  
2 selection acting on a complex trait using allele frequency time series data. *Molecular*  
3 *Biology and Evolution*, 29(4), 1187–1197. <https://doi.org/10.1093/molbev/msr289>
- 4 Jerison, E. R., Kryazhimskiy, S., Mitchell, J. K., Bloom, J. S., Kruglyak, L., & Desai, M. M.  
5 (2017). Genetic variation in adaptability and pleiotropy in budding yeast. *ELife*, 6.  
6 <https://doi.org/10.7554/eLife.27167>
- 7 Khan, A. I., Dinh, D. M., Schneider, D., Lenski, R. E., & Cooper, T. F. (2011). Negative epistasis  
8 between beneficial mutations in an evolving bacterial population. *Science (New York,*  
9 *N.Y.)*, 332(6034), 1193–1196. <https://doi.org/10.1126/science.1203801>
- 10 Koç, A., Wheeler, L. J., Mathews, C. K., & Merrill, G. F. (2004). Hydroxyurea Arrests DNA  
11 Replication by a Mechanism That Preserves Basal dNTP Pools. *Journal of Biological*  
12 *Chemistry*, 279(1), 223–230. <https://doi.org/10.1074/jbc.M303952200>
- 13 Kumar, S., Stecher, G., & Tamura, K. (2016). MEGA7: Molecular Evolutionary Genetics  
14 Analysis Version 7.0 for Bigger Datasets. *Molecular Biology and Evolution*, 33(7),  
15 1870–1874. <https://doi.org/10.1093/molbev/msw054>
- 16 Kvitek, D. J., & Sherlock, G. (2013). Whole Genome, Whole Population Sequencing Reveals  
17 That Loss of Signaling Networks Is the Major Adaptive Strategy in a Constant  
18 Environment. *PLOS Genetics*, 9(11), e1003972.  
19 <https://doi.org/10.1371/journal.pgen.1003972>
- 20 Lang, G. I., Rice, D. P., Hickman, M. J., Sodergren, E., Weinstock, G. M., Botstein, D., & Desai,  
21 M. M. (2013). Pervasive genetic hitchhiking and clonal interference in forty evolving  
22 yeast populations. *Nature*, 500(7464), 571–574. <https://doi.org/10.1038/nature12344>
- 23 Levy, S. F., Blundell, J. R., Venkataram, S., Petrov, D. A., Fisher, D. S., & Sherlock, G. (2015).  
24 Quantitative evolutionary dynamics using high-resolution lineage tracking. *Nature*,  
25 519(7542), 181–186. <https://doi.org/10.1038/nature14279>
- 26 Li, H. (2011). A statistical framework for SNP calling, mutation discovery, association mapping  
27 and population genetical parameter estimation from sequencing data. *Bioinformatics*,  
28 27(21), 2987–2993. <https://doi.org/10.1093/bioinformatics/btr509>
- 29 Li, H., & Durbin, R. (2009). Fast and accurate short read alignment with Burrows-Wheeler  
30 transform. *Bioinformatics (Oxford, England)*, 25(14), 1754–1760.  
31 <https://doi.org/10.1093/bioinformatics/btp324>
- 32 Liti, G., Carter, D. M., Moses, A. M., Warringer, J., Parts, L., James, S. A., ... Louis, E. J.  
33 (2009). Population genomics of domestic and wild yeasts. *Nature*, 458(7236), 337–341.  
34 <https://doi.org/10.1038/nature07743>

- 1 Liu, G., Yong, M. Y. J., Yurieva, M., Srinivasan, K. G., Liu, J., Lim, J. S. Y., ... Rancati, G.  
2 (2015). Gene Essentiality Is a Quantitative Property Linked to Cellular Evolvability. *Cell*,  
3 *163*(6), 1388–1399. <https://doi.org/10.1016/j.cell.2015.10.069>
- 4 Loewith, R., & Hall, M. N. (2011). Target of Rapamycin (TOR) in Nutrient Signaling and  
5 Growth Control. *Genetics*, *189*(4), 1177–1201.  
6 <https://doi.org/10.1534/genetics.111.133363>
- 7 Loewith, R., Jacinto, E., Wullschleger, S., Lorberg, A., Crespo, J. L., Bonenfant, D., ... Hall, M.  
8 N. (2002). Two TOR complexes, only one of which is rapamycin sensitive, have distinct  
9 roles in cell growth control. *Molecular Cell*, *10*(3), 457–468.
- 10 Long, A., Liti, G., Luptak, A., & Tenaillon, O. (2015). Elucidating the molecular architecture of  
11 adaptation via evolve and resequence experiments. *Nature Reviews Genetics*, *16*(10),  
12 567–582. <https://doi.org/10.1038/nrg3937>
- 13 Lunter, G., & Goodson, M. (2011). Stampy: A statistical algorithm for sensitive and fast mapping  
14 of Illumina sequence reads. *Genome Research*, *21*(6), 936–939.  
15 <https://doi.org/10.1101/gr.111120.110>
- 16 Mason, D. L., Mallampalli, M. P., Huyer, G., & Michaelis, S. (2003). A Region within a Luminal  
17 Loop of *Saccharomyces cerevisiae* Ycf1p Directs Proteolytic Processing and Substrate  
18 Specificity. *Eukaryotic Cell*, *2*(3), 588–598. <https://doi.org/10.1128/EC.2.3.588-598.2003>
- 19 McGranahan, N., & Swanton, C. (2017). Clonal Heterogeneity and Tumor Evolution: Past,  
20 Present, and the Future. *Cell*, *168*(4), 613–628. <https://doi.org/10.1016/j.cell.2017.01.018>
- 21 McLaren, W., Gil, L., Hunt, S. E., Riat, H. S., Ritchie, G. R. S., Thormann, A., ... Cunningham,  
22 F. (2016). The Ensembl Variant Effect Predictor. *Genome Biology*, *17*, 122.  
23 <https://doi.org/10.1186/s13059-016-0974-4>
- 24 Palmer, A. C., & Kishony, R. (2013). Understanding, predicting and manipulating the genotypic  
25 evolution of antibiotic resistance. *Nature Reviews Genetics*, *14*(4), 243–248.  
26 <https://doi.org/10.1038/nrg3351>
- 27 Parts, L., Cubillos, F. A., Warringer, J., Jain, K., Salinas, F., Bumpstead, S. J., ... Liti, G. (2011).  
28 Revealing the genetic structure of a trait by sequencing a population under selection.  
29 *Genome Research*, *21*(7), 1131–1138. <https://doi.org/10.1101/gr.116731.110>
- 30 Payen, C., Sunshine, A. B., Ong, G. T., Pogachar, J. L., Zhao, W., & Dunham, M. J. (2016).  
31 High-Throughput Identification of Adaptive Mutations in Experimentally Evolved Yeast  
32 Populations. *PLOS Genetics*, *12*(10), e1006339.  
33 <https://doi.org/10.1371/journal.pgen.1006339>

- 1 Perfeito, L., Sousa, A., Bataillon, T., & Gordo, I. (2014). Rates of fitness decline and rebound  
2 suggest pervasive epistasis. *Evolution; International Journal of Organic Evolution*, 68(1),  
3 150–162. <https://doi.org/10.1111/evo.12234>
- 4 Powers, R. W. (2006). Extension of chronological life span in yeast by decreased TOR pathway  
5 signaling. *Genes & Development*, 20(2), 174–184. <https://doi.org/10.1101/gad.1381406>
- 6 Rimmer, A., Phan, H., Mathieson, I., Iqbal, Z., Twigg, S. R. F., Consortium, W., ... Lunter, G.  
7 (2014). Integrating mapping-, assembly- and haplotype-based approaches for calling  
8 variants in clinical sequencing applications. *Nature Genetics*, 46(8), 912–918.  
9 <https://doi.org/10.1038/ng.3036>
- 10 Sasaki, K., Tsuge, Y., Sasaki, D., Hasunuma, T., Sakamoto, T., Sakihama, Y., ... Kondo, A.  
11 (2014). Optimized membrane process to increase hemicellulosic ethanol production from  
12 pretreated rice straw by recombinant xylose-fermenting *Saccharomyces cerevisiae*.  
13 *Bioresource Technology*, 169, 380–386. <https://doi.org/10.1016/j.biortech.2014.06.101>
- 14 Saunders, N. A., Simpson, F., Thompson, E. W., Hill, M. M., Endo-Munoz, L., Leggatt, G., ...  
15 Guminski, A. (2012). Role of intratumoural heterogeneity in cancer drug resistance:  
16 molecular and clinical perspectives. *EMBO Molecular Medicine*, 4(8), 675–684.  
17 <https://doi.org/10.1002/emmm.201101131>
- 18 Schmittgen, T. D., & Livak, K. J. (2008). Analyzing real-time PCR data by the comparative CT  
19 method. *Nature Protocols*, 3(6), 1101–1108. <https://doi.org/10.1038/nprot.2008.73>
- 20 Sheng, Z., Pettersson, M. E., Honaker, C. F., Siegel, P. B., & Carlborg, Ö. (2015). Standing  
21 genetic variation as a major contributor to adaptation in the Virginia chicken lines  
22 selection experiment. *Genome Biology*, 16, 219. [https://doi.org/10.1186/s13059-015-](https://doi.org/10.1186/s13059-015-0785-z)  
23 [0785-z](https://doi.org/10.1186/s13059-015-0785-z)
- 24 Sim, N.-L., Kumar, P., Hu, J., Henikoff, S., Schneider, G., & Ng, P. C. (2012). SIFT web server:  
25 predicting effects of amino acid substitutions on proteins. *Nucleic Acids Research*,  
26 40(W1), W452–W457. <https://doi.org/10.1093/nar/gks539>
- 27 Turner, N. C., & Reis-Filho, J. S. (2012). Genetic heterogeneity and cancer drug resistance. *The*  
28 *Lancet. Oncology*, 13(4), e178-185. [https://doi.org/10.1016/S1470-2045\(11\)70335-7](https://doi.org/10.1016/S1470-2045(11)70335-7)
- 29 Vázquez-García, I., Salinas, F., Li, J., Fischer, A., Barré, B., Hallin, J., ... Liti, G. (2017). Clonal  
30 Heterogeneity Influences the Fate of New Adaptive Mutations. *Cell Reports*, 21(3), 732–  
31 744. <https://doi.org/10.1016/j.celrep.2017.09.046>
- 32 Venkataram, S., Dunn, B., Li, Y., Agarwala, A., Chang, J., Ebel, E. R., ... Petrov, D. A. (2016).  
33 Development of a Comprehensive Genotype-to-Fitness Map of Adaptation-Driving

- 1 Mutations in Yeast. *Cell*, 166(6), 1585–1596.e22.  
2 <https://doi.org/10.1016/j.cell.2016.08.002>
- 3 Warringer, J., Liti, G., & Blomberg, A. (2017). Yeast Reciprocal Hemizygoty to Confirm the  
4 Causality of a Quantitative Trait Loci-Associated Gene. *Cold Spring Harbor Protocols*,  
5 2017(8), pdb.prot089078. <https://doi.org/10.1101/pdb.prot089078>
- 6 Warringer, J., Zörgö, E., Cubillos, F. A., Zia, A., Gjuvsland, A., Simpson, J. T., ... Blomberg, A.  
7 (2011). Trait Variation in Yeast Is Defined by Population History. *PLOS Genetics*, 7(6),  
8 e1002111. <https://doi.org/10.1371/journal.pgen.1002111>
- 9 Winzeler, E. A., Shoemaker, D. D., Astromoff, A., Liang, H., Anderson, K., Andre, B., ... Davis,  
10 R. W. (1999). Functional Characterization of the *S. cerevisiae* Genome by Gene Deletion  
11 and Parallel Analysis. *Science*, 285(5429), 901–906.  
12 <https://doi.org/10.1126/science.285.5429.901>
- 13 Yang, Z. (2007). PAML 4: Phylogenetic Analysis by Maximum Likelihood. *Molecular Biology*  
14 *and Evolution*, 24(8), 1586–1591. <https://doi.org/10.1093/molbev/msm088>
- 15 Yue, J.-X., Li, J., Aigrain, L., Hallin, J., Persson, K., Oliver, K., ... Liti, G. (2017). Contrasting  
16 evolutionary genome dynamics between domesticated and wild yeasts. *Nature Genetics*,  
17 49(6), 913–924. <https://doi.org/10.1038/ng.3847>
- 18 Zackrisson, M., Hallin, J., Ottosson, L.-G., Dahl, P., Fernandez-Parada, E., Ländström, E., ...  
19 Blomberg, A. (2016). Scan-o-matic: High-Resolution Microbial Phenomics at a Massive  
20 Scale. *G3: Genes|Genomes|Genetics*, g3.116.032342.  
21 <https://doi.org/10.1534/g3.116.032342>
- 22

## 23 **Figure Legend**

24

25 **Figure 1. Adaptation of isogenic and heterogeneous populations to rapamycin and**  
26 **hydroxyurea.** (A) Ancestral populations with increasing standing variation from isogenic  
27 parental, two-parent to four-parent populations (top) and timeline of selection experiment for  
28 isogenic and four-parent populations (bottom). The timeline of two-parent selection experiment is  
29 listed in Table S1. Random subsamples of the initial populations, and of the 1<sup>st</sup>, 2<sup>nd</sup>, 4<sup>th</sup>, 8<sup>th</sup> and  
30 the last transfer (T14 for HU and T15 for RM in the isogenic and four-parent populations; T16 for  
31 HU and RM in the two-parent populations) were sequenced in bulk. (B) Doubling time in RM  
32 (top) and HU (bottom) of the randomly sampled bulk populations after each expansion cycle.  
33 Boxplot shows the doubling time of all the replicated populations (Table S2). (C) Doubling time

1 of clonal populations expanded from random, single individuals drawn from the ancestral and  
2 endpoint populations (Table S2) in RM (top) and HU (bottom). For each drug, we phenotyped  
3 384 random individuals from both the ancestral and endpoint four-parent populations, as well as  
4 48 and 96 random individuals from each ancestral and endpoint isogenic parental replicate  
5 population. Boxplot shows the doubling time of these individuals. The WA isogenic populations  
6 went extinct after T2 in HU. One WE isogenic population in RM was contaminated at T15 and  
7 therefore T8 was analyzed instead. \*That wide doubling time distribution of two-parent  
8 individuals in RM at T16 is due to the coexistence of fast and slow growth individuals with and  
9 without driver mutations, see (Vázquez-García et al., 2017). Boxplot: center lines = median;  
10 boxes = interquartile range (IQR); whiskers = 1.5×IQR; points = outliers beyond 1.5×IQR.

11

12 **Figure 2. *De novo* mutations in *TOR1* and *FPRI* drive rapamycin adaptation in isogenic**

13 **populations.** (A) Bars: frequency dynamics of *de novo* driver mutations emerging in isogenic  
14 populations adapting to RM (left y-axis). Bar color = driver mutations (in *FPRI* = light-dark blue,  
15 in *TOR1* = yellow-brown). Line: the mean doubling time of bulk population (right y-axis). (B)

16 Doubling time of random individuals drawn from the ancestral (T0,  $n = 48$  for each parent), RM  
17 evolved (T15,  $n = 192$  for each parent) populations and genotyped individuals. We divided  
18 genotyped individuals into groups based on their driver mutations; no individual carried more  
19 than one driver mutation. The number above each boxplot indicates the number of genotyped

20 individuals with confirmed driver mutations by Sanger sequencing. (C) Median chromosome  
21 sequencing depth ( $x$ ) for each chromosome in isogenic SA populations adapting to RM (left),  
22 shown as a  $z$ -score =  $(x - \mu)/\sigma$ , here  $\mu$  and  $\sigma$  is the mean and standard deviation of sequencing  
23 depth of each population. The genome-wide sequencing depth of population SA\_RM\_2\_T15

24 (right), measured by whole-population genome sequencing. Genomic positions are shown on the  
25  $x$ -axis; the sequencing depth is shown on the  $y$ -axis. Each point indicates the median sequencing  
26 depth within a 10-kb window on each chromosome. The red line indicates the median sequencing

27 depth of each chromosome. (D) Design (left) and doubling time (right) of a cross grid experiment.

28 We crossed spores from individuals drawn from the RM evolved (T15) SA populations to  
29 generate diploids with known driver mutation genotypes. “+” and “-” = *TOR1* genotypes, WT and  
30 *de novo* mutated respectively. Blue bar = chromosome IX. Marker shape = chromosome IX copy  
31 number, marker color = *TOR1* genotype. Boxplot: center lines, median; boxes, interquartile range  
32 (IQR); whiskers, 1.5×IQR. Data points beyond the whiskers are outliers.

33

1 **Figure 3. *De novo* mutations in *TOR1*, *TOR2* and *FPR1* drive rapamycin adaptation in**  
2 **heterogeneous populations.** (A) Frequency dynamics of *de novo* driver mutations emerging in  
3 four-parent populations adapting to RM. Top and bottom panels show replicates from F12\_1 and  
4 F12\_2 respectively. (B) Doubling time of random individuals drawn from the ancestral (T0,  $n =$   
5 384) and RM evolved (T15,  $n = 384$  individuals) populations. We divided genotyped individuals  
6 into groups based on their driver mutations; no individual carried more than one driver mutation.  
7 The number above each boxplot indicates the number of genotyped individuals with or without  
8 driver mutations by Sanger sequencing. Boxplot: center lines, median; boxes, interquartile range  
9 (IQR); whiskers,  $1.5 \times \text{IQR}$ . Data points beyond the whiskers are outliers.  
10

11 **Figure 4. *RNR4* QTL drive adaptation in heterogeneous populations in HU.** (A) The  $z$ -score  
12 square is derived from allele frequency changes compared to T0 during early phase of selection  
13 (T1-T4) and underlies QTLs. Dashed and solid lines indicate 99% and 95% quantile cut-off  
14 respectively. Strong QTLs are labeled in red and weak ones are in black (coordinates listed in  
15 Table 1). (B) WE allele frequency changes in chromosome VII in one of the four-parent  
16 populations evolved in HU (F12\_1\_HU\_2) from T0 to T14. The region in the black box contains  
17 the *RNR4* QTL. (C) Frequency changes of the four *RNR4* alleles from T0 to T14, showing 1:3  
18 segregating pattern (one strong allele vs. three weak alleles). The error bars indicate the standard  
19 deviation of all the eight replicates. The region highlighted in red indicates the early phase of  
20 selection used for QTL mapping. (D) Doubling time of *RNR4* reciprocal hemizygotes measured  
21 in HU and control experimentally confirmed the *RNR4* causative variants. Boxplot: Center lines,  
22 median; boxes, interquartile range (IQR); whiskers,  $1.5 \times \text{IQR}$ . Data points beyond the whiskers  
23 are outliers.  
24

25 **Figure 5. *TOR1* and *TOR2* allelic variation.** (A) *TOR1* (top) and *TOR2* (bottom) allele  
26 frequency changes of the four-parent populations during RM selection. The region highlighted in  
27 red indicates the early phase of selection used for QTL mapping. The points and error bars  
28 indicate the mean and standard deviation of all the eight replicates. (B) Doubling time (left) and  
29 yield (right) of WE/SA hybrid with *TOR1* and *TOR2* reciprocal hemizygote deletions confirm the  
30 causative variants for RM resistance. (C) Chronological life span (CLS) of *TOR1* and *TOR2*  
31 reciprocal hemizygotes (WE/SA) in the presence and absence of RM. (D) Characterization of the  
32 TORC1 activity by immunoblot of Rps6 phosphorylation in WT parents, hybrid and *TOR1*, *TOR2*  
33 reciprocal hemizygotes. Cells were treated with RM (200 ng/ml) for the indicated time (minute).

1 Total lysates were resolved by SDS-PAGE on 10% polyacrylamide gels and analyzed by  
2 immunoblot. Actin was used as loading control. The “short”, “interm.” and “long” panels indicate  
3 the exposure time of the membrane to the film. (E) Growth phenotypes of wild type strains and  
4 *TOR1*, *TOR2* reciprocal hemizygotes in 18 environments, corresponding to synthetic wine must  
5 and single nitrogen source environments at nitrogen limiting concentrations. Heat map shows the  
6 fold change of doubling time compared with WE/SA wild type hybrid.

7  
8 **Figure 6. Functional characterization of the *TOR2* variants.** (A) The SA *tor2Δ* cells are able  
9 to grow on synthetic complete (SC) medium although with visible growth defect, but not on YPD.  
10 (B) Growth curves of the SA *tor2Δ* and SA wild type strains in SC. (C) Immunoblot analysis  
11 showed Rps6 phosphorylation in SA wild type and *tor2Δ* strains shows that TORC1 activity is  
12 not altered by the *TOR2* deletion. All conditions are similar to the one reported in Figure 5D. (D)  
13 Representative plates acquired 4 days after tetrad dissection on SC and YPD for WE/SA wild  
14 type and its *TOR2* reciprocal hemizygotes. The red circles indicate viable *tor2Δ* strains.

15  
16 **Figure S1. Spotting assay of all the four-parent and isogenic populations in this study.**  
17 Populations were sampled at T0, T1, T2, T4, T8 and T14 (HU) or T15 (RM and control). Each  
18 spot represents 10-fold serial dilution of the cells from left to right.

19  
20 **Figure S2. Doubling time of each randomly sampled heterogeneous bulk populations.** (A)  
21 the four-parent populations in HU, (B) the four-parent populations in RM, (C) the two-parent  
22 populations in HU and (D) the two-parent populations in RM after each expansion cycle. The  
23 timeline for the experiment evolution is listed in Table S1. Boxplot shows the doubling time of all  
24 the technical replicates. Boxplot: Center lines, median; boxes, interquartile range (IQR);  
25 whiskers, 1.5×IQR. Data points beyond the whiskers are outliers.

26  
27  
28 **Figure S3. Doubling time of each randomly sampled isogenic bulk populations.** Doubling  
29 time of isogenic populations evolved in RM (A, C, E, G) and HU (B, D, F, H). The top and  
30 bottom panels show two replicates of each parent. The timeline for the experiment evolution is  
31 listed in Table S1. WA in HU died out after T2. The second replicate of WE in RM was  
32 contaminated after T8. Boxplot shows the doubling time of all the technical replicates. Boxplot:



1 Center lines, median; boxes, interquartile range (IQR); whiskers,  $1.5 \times \text{IQR}$ . Data points beyond  
2 the whiskers are outliers.

3

4 **Figure S4. Doubling time of individuals drawn from the initial and final populations.**

5 Doubling time of individuals from (A) isogenic populations evolved in RM, (B) isogenic  
6 populations evolved in HU, (C) four-parent populations evolved in RM, (D) four-parent  
7 populations evolved in HU condition. There are 48 isolates from each ancestral and 96 isolates  
8 from each final replicate population. WA in HU is not included due to the extinction after T2.

9 The doubling time of *RNR4* mutants from the NA populations is shown in (B, the NA panel). The  
10 number above the boxplot indicates the number of genotyped individuals with confirmed driver  
11 mutations by Sanger sequencing. Boxplot: Center lines, median; boxes, interquartile range (IQR);  
12 whiskers,  $1.5 \times \text{IQR}$ . Data points beyond the whiskers are outliers.

13

14 **Figure S5. Spotting assay of the genetic constructs and strains from the 1002 Yeast**

15 **Genomes project.** (A) Phenotype of *RNR4* reciprocal hemizyosity constructs in HU and control.

16 (B) Phenotype of *RNR4* hemizygous deletion of the four parental diploid strains in HU and  
17 control. Phenotype of (C) *TOR1* and (D) *TOR2* reciprocal hemizyosity constructs in RM and  
18 control. (E) Phenotypes of wild type strains from the 1002 Yeast Genomes project. The diploid

19 strains with heterozygous Q/H amino acids at position 2000 in *TOR1* and homozygous L/L amino  
20 acids at position 2047 in *TOR2* show RM resistance. (F) Spotting assays of 48 isolates from SA  
21 endpoint population evolved in RM (SA\_RM\_2\_T15) in heat condition (40°C). The isolates with  
22 red, yellow and blue circles were confirmed to have two, three and four copies of chromosome IX  
23 respectively by real-time PCR. Extra copies of chromosome IX lead to heat sensitivity.

24

25 **Figure S6. Genome-wide allele frequency of the endpoint populations.** The endpoint

26 populations (T15) evolved in RM shows similar pattern in replicates within the same intercross  
27 replica (F12\_1 or F12\_2) but different between them. We observed similar allele frequency  
28 pattern in populations that had the *FPR1* Thr82Pro mutation (A-C, F12\_1 replicates); and that  
29 had the *TOR1* Trp2038Ser mutation (D-E, F12\_2 replicates).

30

31 **Figure S7. Genome-wide allele frequency changes across multiple time points.** Two

32 representative populations evolved in RM (left) and HU (right) are shown. The four panels show  
33 allele frequency changes of the four parental lineages (WA, NA, WE and SA from top to bottom).

34 Early and late time points are indicated by colors from light to dark. At earlier phase, local allele

1 frequency changes are the signal of selection on standing variation underlying responsible QTLs.  
2 At later phase, with the emergence of highly resistant clones, broad jumps in allele frequency are  
3 observed across the genome.

4

5 **Figure S8. Four-parent population allele frequency density plots.** Allele frequency  
6 distribution in HU (A) and RM (B) in all the replicates. Initially, the distribution of allele  
7 frequency derived from the four parents is close to a normal distribution centered on 0.25. The  
8 distribution pattern changes in late phase due to the emergence of resistant clones. To be  
9 conservative, we used T0 to T2 in RM and T0 to T4 in HU for the identification of QTLs, when  
10 selection mostly acted on standing variation.

11

12 **Figure S9. Allele frequencies dynamic at QTLs.** Frequency changes of the parental alleles  
13 throughout the selection experiment with respect to their initial frequency at T0 in HU (A) and  
14 RM (B). Positive values indicate a frequency increases while negative values correspond to  
15 frequency decreases. Dots and lines in dark and light blue indicate replicates from F12\_1 and  
16 F12\_2 respectively.

17

18 **Figure S10. Identification of QTLs in RM and control conditions.** We used allele frequency  
19 from T0 to T2 to identify QTLs for RM resistance (A) and T0 to T4 for drug-free condition (B).  
20 Dashed and solid lines indicate 99% and 95% quantile cut-off respectively. The red and black  
21 labels respectively indicate the QTLs passing 99% and 95% cut-off.

22

23 **Figure S11. Sequence analysis of *TOR1*, *TOR2* and *RNR4*.** The ratio of non-synonymous and  
24 synonymous substitutions (dN/dS), sequence diversity, and sequence conservation analysis of (A)  
25 *TOR1*, (B) *TOR2* and (C) *RNR4*. Functional domains are highlighted with different colors. The  
26 dashed line shows dN/dS = 1, indicating no selection (neutral). Values above 1 indicate positive  
27 selection and below 1 indicate purifying or stabilizing selection. All the plots are based on 60-bp  
28 window for each gene. dN/dS and diversity value is based on the sequences from the 1002 Yeast  
29 Genomes project. The conservation was calculated based on the multi-species sequence  
30 alignment compiled by SIFT for each tested polymorphic site (See Materials and Methods).  
31 Circle indicates the positions of standing variants and star indicates *de novo* mutations (Table 2).  
32 Grey color represents variants with significant SIFT score, indicating positions of high  
33 conservation.

34

1 **Figure S12. Local allele frequency changes in *TOR1* and *TOR2*.** (A) Allele frequency changes  
2 of *TOR1* in population F12\_2\_RM\_2. (B) Allele frequency changes of *TOR2* in population  
3 F12\_2\_RM\_4. The panels show allele frequency changes of the four parental alleles (WA, NA,  
4 WE and SA from top to bottom). Early and late time points are indicated by colors from light to  
5 dark. The positions of *TOR1* and *TOR2* are indicated underneath the genomic coordinates  
6 reported in the x-axis.

7

8 **Figure S13. QTLs mapping in the two-parent populations.** We applied the same QTL  
9 mapping approach used in this study to the two-parent populations dataset for HU (A) and RM  
10 (B). The z-score signals are very modest compared to the signals detected from the four-parent  
11 populations.

12

13

1 **Table 1. List of quantitative trait loci (QTLs)**

| Chr  | Region (kb) | Peak position (kb) | Length (kb) | Drug | 99 % | 95 % | Segregating pattern     | Candidate genes                                    | Maintain until end |
|------|-------------|--------------------|-------------|------|------|------|-------------------------|----------------------------------------------------|--------------------|
| IV   | 503-563     | 543                | 60          | HU   | ✓    |      | 1:3 (SA > WA/NA/WE)     | <i>HEM12</i>                                       | ✓                  |
| VII  | 841-863     | 853                | 22          | HU   | ✓    |      | 1:3 (WE > WA/NA/SA)     | <i>RNR4, PBP1</i>                                  | ✓                  |
| II   | 251-273     | 263                | 22          | HU   |      | ✓    | 2:2 (WA/SA > NA/WE)     |                                                    | ✓                  |
| II   | 793-813     | 803                | 20          | HU   |      | ✓    | 2:2 (WA/WE > NA/SA)     | <i>MAL31</i><br>(subtelomere)                      |                    |
| VII  | 769-795     | 783                | 26          | HU   |      | ✓    | 3:1 (WA/WE/SA > NA)     | <i>THI4</i>                                        |                    |
| VIII | 287-309     | 299                | 22          | HU   |      | ✓    | 1:2:1 (WE > NA/SA > WA) |                                                    |                    |
| XV   | 19-39       | 29                 | 20          | HU   |      | ✓    | 1:2:1 (NA > WA/SA > WE) | <i>HXT11</i><br>(subtelomere)                      | ✓                  |
| XV   | 43-69       | 59                 | 26          | HU   |      | ✓    | 1:2:1 (NA > WE/SA > WA) |                                                    | ✓                  |
| XV   | 1055-1079   | 1069               | 24          | HU   |      | ✓    | 1:2:1 (WA > NA/SA > WE) |                                                    | ✓                  |
| X    | 527-579     | 565                | 52          | RM   | ✓    |      | 1:2:1 (SA > NA/WA > WE) | <i>TOR1</i>                                        |                    |
| X    | 723-743     | 733                | 20          | RM   | ✓    |      | 2:2 (WA/NA > WE/SA)     |                                                    | ✓                  |
| XI   | 43-69       | 57                 | 26          | RM   | ✓    |      | 1:2:1 (WE > WA/NA > SA) | <i>TOR2</i>                                        | ✓                  |
| XV   | 1053-1075   | 1063               | 22          | RM   | ✓    |      | 2:1:1 (SA/WA > NA > WE) | <i>FRE5</i>                                        |                    |
| II   | 793-813     | 803                | 20          | RM   |      | ✓    | 3:1 (WA/WE/SA > NA)     | <i>MAL31</i><br>(subtelomere)                      |                    |
| III  | 271-293     | 283                | 22          | RM   |      | ✓    | 1:2:1 (WA > NA/WE > SA) | <i>CDC50,</i><br><i>KIN82</i>                      |                    |
| IV   | 471-527     | 517                | 56          | RM   |      | ✓    | 2:2 (WE/SA > WA/NA)     | <i>SNQ2, KCS1,</i><br><i>VPS54</i>                 | ✓                  |
| VIII | 49-75       | 63                 | 26          | RM   |      | ✓    | 1:2:1 (SA > WA/WE > NA) | <i>NPR3</i>                                        | ✓                  |
| VIII | 429-537     | 481                | 108         | RM   |      | ✓    | 2:2 (NA/WE > WA/SA)     | <i>CTF8, KOG1,</i><br><i>STB5</i>                  | ✓                  |
| IX   | 15-35       | 25                 | 20          | RM   |      | ✓    | 2:2 (WE/SA > WA/NA)     |                                                    |                    |
| XI   | 635-657     | 647                | 22          | RM   |      | ✓    | 2:2 (NA/SA > WA/WE)     | <i>YKR103W,</i><br><i>YKR104W</i><br>(subtelomere) | ✓                  |
| XII  | 525-545     | 535                | 20          | RM   |      | ✓    | 2:2 (WA/WE > NA/SA)     |                                                    |                    |
| XVI  | 251-283     | 267                | 32          | RM   |      | ✓    | 1:2:1 (NA > WE/SA > WA) |                                                    | ✓                  |

2

1 **Table 2 Predicting mechanistic consequences of substitutions in genes of interest**

| Gene        | Position | Standing variation |       |          |          |          |          | De novo mutations          | Domain                         | Score (x10 <sup>-2</sup> ) | IC   |
|-------------|----------|--------------------|-------|----------|----------|----------|----------|----------------------------|--------------------------------|----------------------------|------|
|             |          | <i>S. par</i>      | S288C | WA       | WE       | SA       | NA       |                            |                                |                            |      |
| <i>RNR4</i> | 24       | D                  | D     | D        | <b>N</b> | D        | D        |                            |                                |                            |      |
| <i>RNR4</i> | 161      | A                  | A     | A        | <b>T</b> | A        | A        |                            | Ribonucleotide reductase small | 1.87                       | 2.78 |
| <i>RNR4</i> | 114      | K                  |       |          |          |          |          | M (NA)                     | Ribonucleotide reductase small | 0.15                       | 2.80 |
| <i>RNR4</i> | 34       | R                  |       |          |          |          |          | I (NA, two-parent)         | Ribonucleotide reductase small | 0.12                       | 2.71 |
| <i>RNR4</i> | 34       | R                  |       |          |          |          |          | G (two-parent)             | Ribonucleotide reductase small | 1.70                       | 2.71 |
| <i>TOR1</i> | 58       | G                  | D     | G        | <b>D</b> | G        | G        |                            |                                |                            |      |
| <i>TOR1</i> | 133      | S                  | S     | N        | <b>S</b> | N        | N        |                            |                                |                            |      |
| <i>TOR1</i> | 175      | I                  | V     | <b>L</b> | V        | V        | V        |                            |                                |                            |      |
| <i>TOR1</i> | 1117     | S                  | S     | S        | S        | <b>P</b> | S        |                            |                                |                            |      |
| <i>TOR1</i> | 1292     | E                  | G     | G        | <b>E</b> | G        | G        |                            |                                |                            |      |
| <i>TOR1</i> | 1451     | V                  | V     | <b>I</b> | V        | V        | V        |                            |                                |                            |      |
| <i>TOR1</i> | 1640     | A                  | F     | V        | <b>F</b> | V        | V        |                            | FAT                            |                            |      |
| <i>TOR1</i> | 1868     | K                  | K     | K        | K        | <b>R</b> | K        |                            |                                |                            |      |
| <i>TOR1</i> | 1972     | S                  |       |          |          |          |          | R (NA, SA, four-parent)    | rapamycin binding              | 4.14                       | 2.74 |
| <i>TOR1</i> | 1972     | S                  |       |          |          |          |          | N (SA, four-parent)        | rapamycin binding              | 0.64                       | 2.74 |
| <i>TOR1</i> | 1972     | S                  |       |          |          |          |          | I (WE, SA, NA, two-parent) | rapamycin binding              | 0.16                       | 2.74 |
| <i>TOR1</i> | 2038     | W                  |       |          |          |          |          | L (WA, WE, NA, two-parent) | rapamycin binding              | 0.00                       | 2.74 |
| <i>TOR1</i> | 2038     | W                  |       |          |          |          |          | S (four-parent)            | rapamycin binding              | 0.00                       | 2.74 |
| <i>TOR1</i> | 2045     | F                  |       |          |          |          |          | L (WA)                     | rapamycin binding              |                            |      |
| <i>TOR1</i> | 2091     | A                  | A     | A        | A        | A        | <b>V</b> |                            |                                |                            |      |
| <i>TOR1</i> | 2414     | R                  | K     | R        | <b>K</b> | R        | R        |                            |                                |                            |      |
| <i>TOR2</i> | 38       | H                  | H     | <b>N</b> | H        | H        | H        |                            |                                |                            |      |
| <i>TOR2</i> | 122      | E                  | E     | E        | E        | <b>G</b> | E        |                            |                                | 1.84                       | 2.76 |
| <i>TOR2</i> | 379      | A                  | A     | A        | <b>S</b> | A        | A        |                            |                                |                            |      |
| <i>TOR2</i> | 607      | P                  | S     | P        | P        | <b>S</b> | P        |                            |                                |                            |      |
| <i>TOR2</i> | 1369     | I                  | I     | I        | I        | <b>M</b> | I        |                            |                                | 1.02                       | 2.75 |
| <i>TOR2</i> | 1975     | S                  |       |          |          |          |          | I (four-parent)            | rapamycin binding              | 0.17                       | 2.75 |
| <i>TOR2</i> | 1856     | I                  | I     | I        | I        | <b>T</b> | I        |                            |                                |                            |      |
| <i>TOR2</i> | 1872     | I                  | I     | I        | I        | <b>L</b> | I        |                            |                                | 2.16                       | 2.75 |

2

3 We aligned the sequences of *RNR4*, *TOR1* and *TOR2* from the four parents, the *S. cerevisiae*  
4 reference strain S288C and *S. paradoxus* reference strain CBS432 and extracted all the amino  
5 acid changes. The unique amino acid change among the four parents are shown in red. We also  
6 show *de novo* mutations identified in isogenic, two-parent and four-parent populations. We

1 predicted their functional impact by the online tool (mutfunc.com). The predicted scores are listed  
2 in #Score and #IC columns.  
3 The column description is as follows:  
4 # Domain: predicted by Pfam  
5 # Score: SIFT score, any mutation with a score below 0.05 occur in a highly conserved site and  
6 are predicted to be deleterious.  
7 # IC: information content at each position of the alignment. Here, a high value indicates strong  
8 conservation, where the maximum value is 4.32.

1 **Table S1. Timeline of experimental evolution of isogenic, two-parent and four-parent**  
 2 **populations**

| Transfer (T) | Time lines (days)                                    |           |           |                                                  |           |           |
|--------------|------------------------------------------------------|-----------|-----------|--------------------------------------------------|-----------|-----------|
|              | This study<br>(isogenic and four-parent populations) |           |           | Vazquez-Garcia, 2017<br>(two-parent populations) |           |           |
|              | HU                                                   | RM        | Control   | HU                                               | RM        | Control   |
| <b>T0</b>    | <b>0</b>                                             | <b>0</b>  | <b>0</b>  | <b>0</b>                                         | <b>0</b>  | <b>0</b>  |
| <b>T1</b>    | <b>3</b>                                             | <b>3</b>  | <b>3</b>  | <b>2</b>                                         | <b>2</b>  | <b>2</b>  |
| <b>T2</b>    | <b>6</b>                                             | <b>6</b>  | <b>6</b>  | <b>4</b>                                         | <b>4</b>  | <b>4</b>  |
| T3           | 9                                                    | 8         | 8         | 6                                                | 6         | 6         |
| <b>T4</b>    | <b>12</b>                                            | <b>10</b> | <b>10</b> | <b>8</b>                                         | <b>8</b>  | <b>8</b>  |
| T5           | 14                                                   | 12        | 12        | 10                                               | 10        | 10        |
| T6           | 16                                                   | 14        | 14        | 12                                               | 12        | 12        |
| T7           | 18                                                   | 16        | 16        | 14                                               | 14        | 14        |
| <b>T8</b>    | <b>20</b>                                            | <b>18</b> | <b>18</b> | <b>16</b>                                        | <b>16</b> | <b>16</b> |
| T9           | 22                                                   | 20        | 20        | 18                                               | 18        | 18        |
| T10          | 24                                                   | 22        | 22        | 20                                               | 20        | 20        |
| T11          | 26                                                   | 24        | 24        | 22                                               | 22        | 22        |
| T12          | 28                                                   | 26        | 26        | 24                                               | 24        | 24        |
| T13          | 30                                                   | 28        | 28        | 26                                               | 26        | 26        |
| <b>T14</b>   | <b>32</b>                                            | 30        | 30        | 28                                               | 28        | 28        |
| <b>T15</b>   |                                                      | <b>32</b> | <b>32</b> | 30                                               | 30        | 30        |
| <b>T16</b>   |                                                      |           |           | <b>32</b>                                        | <b>32</b> | <b>32</b> |

3  
 4 T0 to T16 indicate the number of serial transfers in the experimental evolution during the 32  
 5 days. We transferred cells of isogenic and four-parent cross populations every 2-3 days and made  
 6 a total of 14 and 15 transfers in HU and RM, respectively. We transferred cells of the two-parent  
 7 cross populations every 2 days and made a total of 16 transfers in both HU and RM (Vázquez-  
 8 García et al., 2017). The labels in red indicate the time points when the populations were  
 9 sequenced, which correspond to the initial population and the populations of the 1<sup>st</sup>, 2<sup>nd</sup>, 4<sup>th</sup>, 8<sup>th</sup>  
 10 and the last transfer.

11  
 12  
 13  
 14

1 **Table S2. Summary of populations and isolates samples in this study**

| Transfers (T) of sequenced populations                                                                                           | Population | Condition | Isolates*                                                           | Mutations**                                                                                                  | Description                      |                              |
|----------------------------------------------------------------------------------------------------------------------------------|------------|-----------|---------------------------------------------------------------------|--------------------------------------------------------------------------------------------------------------|----------------------------------|------------------------------|
| T1 (HU, RM, control)<br>T2 (HU, RM, control)<br>T4 (HU, RM, control)<br>T8 (HU, RM, control)<br>T14 (HU)<br>T15 (RM and control) | F12_1_HU_1 | HU        | 96                                                                  |                                                                                                              | Replicates from F12_1            |                              |
|                                                                                                                                  | F12_1_HU_2 | HU        | 96                                                                  |                                                                                                              |                                  |                              |
|                                                                                                                                  | F12_1_HU_3 | HU        |                                                                     |                                                                                                              |                                  |                              |
|                                                                                                                                  | F12_1_HU_4 | HU        |                                                                     |                                                                                                              |                                  |                              |
|                                                                                                                                  | F12_2_HU_1 | HU        |                                                                     |                                                                                                              | Replicates from F12_2            |                              |
|                                                                                                                                  | F12_2_HU_2 | HU        | 96                                                                  |                                                                                                              |                                  |                              |
|                                                                                                                                  | F12_2_HU_3 | HU        | 96                                                                  |                                                                                                              |                                  |                              |
|                                                                                                                                  | F12_2_HU_4 | HU        |                                                                     |                                                                                                              |                                  |                              |
|                                                                                                                                  | F12_1_RM_1 | RM        |                                                                     |                                                                                                              | <i>FPR1</i><br><i>Thr82Pro</i>   | Replicates from F12_1        |
|                                                                                                                                  | F12_1_RM_2 | RM        | 96                                                                  | <i>FPR1</i><br><i>Thr82Pro</i> ,<br><i>TOR1</i><br><i>Ser1972Asn</i>                                         |                                  |                              |
|                                                                                                                                  | F12_1_RM_3 | RM        |                                                                     | <i>FPR1</i><br><i>Thr82Pro</i>                                                                               |                                  |                              |
|                                                                                                                                  | F12_1_RM_4 | RM        | 96                                                                  | <i>FPR1</i><br><i>Thr82Pro</i>                                                                               |                                  |                              |
|                                                                                                                                  | F12_2_RM_1 | RM        |                                                                     |                                                                                                              | <i>TOR1</i><br><i>Trp2038Ser</i> | Replicates from F12_2        |
|                                                                                                                                  | F12_2_RM_2 | RM        | 96                                                                  | <i>TOR1</i><br><i>Trp2038Ser</i>                                                                             |                                  |                              |
|                                                                                                                                  | F12_2_RM_3 | RM        |                                                                     | <i>TOR1</i><br><i>Trp2038Ser</i> ,<br><i>TOR1</i><br><i>Ser1972Arg</i>                                       |                                  |                              |
|                                                                                                                                  | F12_2_RM_4 | RM        | 96                                                                  | <i>TOR1</i><br><i>Trp2038Ser</i> ,<br><i>TOR1</i><br><i>Ser1972Arg</i> ,<br><i>TOR2</i><br><i>Ser1975Ile</i> |                                  |                              |
|                                                                                                                                  | WA_HU_1    | HU        |                                                                     |                                                                                                              |                                  | Isogenic diploid populations |
|                                                                                                                                  | WA_HU_2    | HU        |                                                                     |                                                                                                              |                                  |                              |
| NA_HU_1                                                                                                                          | HU         | 96        | <i>RNR4</i><br><i>Lys114Met</i> ,<br><i>RNR4</i><br><i>Arg34Ile</i> |                                                                                                              |                                  |                              |
| NA_HU_2                                                                                                                          | HU         | 96        | <i>RNR4</i><br><i>Lys114Met</i> ,<br><i>RNR4</i><br><i>Arg34Ile</i> |                                                                                                              |                                  |                              |
| WE_HU_1                                                                                                                          | HU         | 96        |                                                                     |                                                                                                              |                                  |                              |
| WE_HU_2                                                                                                                          | HU         | 96        |                                                                     |                                                                                                              |                                  |                              |



|    |            |                  |     |                                                                        |                          |
|----|------------|------------------|-----|------------------------------------------------------------------------|--------------------------|
|    | SA_HU_1    | HU               | 96  |                                                                        |                          |
|    | SA_HU_2    | HU               | 96  |                                                                        |                          |
|    | WA_RM_1    | RM               | 96  | <i>TOR1</i><br><i>Trp2038Leu</i>                                       |                          |
|    | WA_RM_2    | RM               | 96  | <i>TOR1</i><br><i>Phe2045Leu</i>                                       |                          |
|    | NA_RM_1    | RM               | 96  | <i>FPR1 Ile11X</i> ,<br><i>TOR1</i><br><i>Ser1972Arg</i>               |                          |
|    | NA_RM_2    | RM               | 96  | <i>FPR1</i><br><i>Met1Ile</i> ,<br><i>TOR1</i><br><i>Ser1972Ile</i>    |                          |
|    | WE_RM_1    | RM               | 96  | <i>TOR1</i><br><i>Ser1972Ile</i>                                       |                          |
|    | WE_RM_2    | RM               | 96  | <i>TOR1</i><br><i>Trp2038Ser</i>                                       |                          |
|    | SA_RM_1    | RM               | 96  | <i>TOR1</i><br><i>Ser1972Ile</i>                                       |                          |
|    | SA_RM_2    | RM               | 96  | <i>TOR1</i><br><i>Ser1972Ile</i> ,<br><i>TOR1</i><br><i>Ser1972Asn</i> |                          |
|    | F12_1_MO_1 | YPD<br>(control) |     |                                                                        | Replicates<br>from F12_1 |
|    | F12_1_MO_2 | YPD<br>(control) |     |                                                                        |                          |
|    | F12_2_MO_1 | YPD<br>(control) |     |                                                                        | Replicates<br>from F12_2 |
|    | F12_2_MO_2 | YPD<br>(control) |     |                                                                        |                          |
| T0 | WA/WA      |                  | 48  |                                                                        |                          |
|    | NA/NA      |                  | 48  |                                                                        |                          |
|    | WE/WE      |                  | 48  |                                                                        |                          |
|    | SA/SA      |                  | 48  |                                                                        |                          |
|    | F12_1      |                  | 192 |                                                                        | F12_1                    |
|    | F12_2      |                  | 192 |                                                                        | F12_2                    |

1

2

\* The isolates were from the ancestral or the final populations. The population of “WE\_RM\_2” was contaminated at T15 and was replaced by T8.

3

4

5

\*\* Driver mutations identified by whole-genome population sequencing in the final population.

1 **Table S3. Sequencing depth (median) of all the samples**

2 See separated file

3

4 **Table S4. List of genotyped clones**

5 See separated file

6

7

8

9

10

1 **Table S5 QTL allele frequencies dynamic at late selection time points**

| Chr  | Region (kb) | Drug | Maintain until the end |     |     |     | Maintain until T8 |     |     |     | Maintain until T4 |     |     |     |
|------|-------------|------|------------------------|-----|-----|-----|-------------------|-----|-----|-----|-------------------|-----|-----|-----|
|      |             |      | WA                     | NA  | WE  | SA  | WA                | NA  | WE  | SA  | WA                | NA  | WE  | SA  |
| IV   | 503-563     | HU   | 8/8                    | 8/8 | 8/8 | 8/8 | 6/8               | 8/8 | 8/8 | 8/8 |                   |     |     |     |
| VII  | 841-863     |      | 7/8                    | 8/8 | 8/8 |     | 8/8               | 8/8 | 8/8 | 7/8 |                   |     |     |     |
| II   | 251-273     |      |                        | 6/8 | 6/8 |     |                   | 6/8 |     | 6/8 |                   |     |     |     |
| II   | 793-813     |      |                        |     |     |     |                   |     |     |     |                   |     |     |     |
| VII  | 769-795     |      |                        |     |     |     |                   | 6/8 |     |     |                   |     |     |     |
| VIII | 287-309     |      |                        |     |     |     |                   |     | 7/8 |     |                   |     |     |     |
| XV   | 19-39       |      |                        |     | 6/8 | 7/8 |                   |     |     |     |                   |     |     |     |
| XV   | 43-69       |      | 7/8                    | 8/8 |     |     | 6/8               | 7/8 |     |     |                   |     |     |     |
| XV   | 1055-1079   |      |                        |     |     | 8/8 |                   |     |     |     |                   |     |     |     |
| X    | 527-579     | RM   |                        |     |     |     |                   |     | 7/8 |     |                   |     | 6/8 | 6/8 |
| X    | 723-743     |      | 7/8                    |     |     |     | 8/8               |     |     |     | 6/8               |     |     |     |
| XI   | 43-69       |      |                        |     |     | 7/8 |                   |     | 8/8 | 8/8 |                   |     | 8/8 | 8/8 |
| XV   | 1053-1075   |      |                        |     |     |     |                   |     |     |     |                   |     |     |     |
| II   | 793-813     |      |                        |     |     |     |                   |     |     |     |                   |     |     |     |
| III  | 271-293     |      |                        |     |     |     |                   |     |     |     |                   |     |     |     |
| IV   | 471-527     |      |                        | 6/8 |     | 7/8 |                   | 7/8 | 6/8 | 6/8 |                   | 7/8 |     |     |
| VIII | 49-75       |      |                        | 8/8 |     |     |                   | 8/8 |     |     |                   | 8/8 |     |     |
| VIII | 429-537     |      | 7/8                    |     | 7/8 | 7/8 | 8/8               |     | 8/8 | 7/8 | 8/8               | 8/8 | 8/8 | 7/8 |
| IX   | 15-35       |      |                        |     |     |     |                   |     |     |     |                   |     |     |     |
| XI   | 635-657     |      |                        |     | 7/8 |     |                   |     | 7/8 |     |                   |     |     |     |
| XII  | 525-545     |      |                        |     |     |     |                   |     | 6/8 |     |                   | 6/8 |     |     |
| XVI  | 251-283     |      | 8/8                    | 6/8 |     |     | 8/8               | 6/8 |     |     | 8/8               |     |     |     |

2  
3 The number shows in how many replicate populations among a total of eight, the corresponding  
4 parental allele of the QTL keeps increasing (in red) or decreasing (in blue).  
5

- 1 **Table S6 Functional variants identified in 1002 Yeast Genomes project**
- 2 See separated file
- 3

1 **Table S7. Tetrad viability analysis of *TOR2* hemizygous deletions**

| Background          | Medium | Tetrads dissected | Distribution of tetrad types |      |      |      |      | Spore viability |
|---------------------|--------|-------------------|------------------------------|------|------|------|------|-----------------|
|                     |        |                   | 4-sv                         | 3-sv | 2-sv | 1-sv | 0-sv |                 |
| SA/WE <i>tor2Δ</i>  | SC     | 96                | 0.03                         | 0.26 | 0.61 | 0.06 | 0.03 | 0.55            |
| SA <i>tor2Δ</i> /WE | SC     | 82                | 0.02                         | 0.39 | 0.41 | 0.13 | 0.04 | 0.56            |
| SA/WE               | SC     | 35                | 0.49                         | 0.40 | 0.09 | 0.03 | 0.00 | 0.84            |
| SA/WE <i>tor2Δ</i>  | YPD    | 24                | 0.00                         | 0.04 | 0.67 | 0.25 | 0.04 | 0.43            |
| SA <i>tor2Δ</i> /WE | YPD    | 22                | 0.00                         | 0.00 | 0.86 | 0.14 | 0.00 | 0.47            |
| SA/WE               | YPD    | 470               | 0.53                         | 0.18 | 0.15 | 0.04 | 0.10 | 0.75            |

2

3 The value displayed in each “Distribution of tetrad types” column is the frequency of tetrads  
4 containing four viable spores (4-sv), three viable spores (3-sv), two viable spores (2-sv), one  
5 viable spore (1-sv) and no viable spores (0-sv). The far right column shows the overall spore  
6 viability of each strain.

1 **Table S8. Number of inferred modifiers for *TOR2* dispensability**

| Background          | Tetrads dissected | Parental ditype (2:2) | Nonparental ditype (4:0) | Tetratype (3:1) | Single gene <i>p</i> value | Three gene <i>p</i> value | Wild type <i>p</i> value |
|---------------------|-------------------|-----------------------|--------------------------|-----------------|----------------------------|---------------------------|--------------------------|
| SA/WE <i>tor2</i> Δ | 96                | 59                    | 6                        | 31              | 7.14E-31                   | 0                         | 5.56E-77                 |
| SA <i>tor2</i> Δ/WE | 82                | 34                    | 5                        | 43              | 4.97E-09                   | 0                         | 3.39E-30                 |
| SA/WE               | 35                | 3                     | 17                       | 15              | 2.59E-06                   | 2.40E-13                  | -                        |

2 Based on the tetrad segregation pattern, a chi-squared statistic ( $\chi^2$ ) was used to test three separate  
3 hypothesis: (1) a single unlinked modifier explains the inheritance patterns (1:1:4 ratio expected);  
4 (2) three unlinked modifiers explain the inheritance patterns; and (3) many loci make the  
5 inheritance patterns indistinguishable from empirically observed background. In all cases, a *p*  
6 value was calculated for the  $\chi^2$  statistic using `chisq.test` in R. See (Dowell et al., 2010) for detail  
7 to calculate the *p* value.

1 **Table S9. Strains used in this study**

| Background | ID       | Derived from | Gene deletion     | Genotype                                                                                                                                              |
|------------|----------|--------------|-------------------|-------------------------------------------------------------------------------------------------------------------------------------------------------|
| WA/WA      | CC426    | DBVPG6044    |                   | <i>MATa/a</i> ,<br><i>ura3::KanMX/ura3::KanMX</i> ,<br><i>ho::HygMX/ho::HygMX</i> ,<br><i>LYS2/lys2::URA3</i>                                         |
| NA/NA      | CC440    | YPS128       |                   | <i>MATa/a</i> ,<br><i>ura3::KanMX/ura3::KanMX</i> ,<br><i>ho::HygMX/ho::HygMX</i> ,<br><i>LYS2/lys2::URA3</i>                                         |
| WE/WE      | CC411    | DBVPG6765    |                   | <i>MATa/a</i> ,<br><i>ura3::KanMX/ura3::KanMX</i> ,<br><i>ho::HygMX/ho::HygMX</i> ,<br><i>LYS2/lys2::URA3</i>                                         |
| SA/SA      | CC454    | Y12          |                   | <i>MATa/a</i> ,<br><i>ura3::KanMX/ura3::KanMX</i> ,<br><i>ho::HygMX/ho::HygMX</i> ,<br><i>LYS2/lys2::URA3</i>                                         |
| WE         | CC401    | DBVPG6765    |                   | <i>Mat a</i> , <i>ura3::KanMX</i> , <i>ho::HygMX</i>                                                                                                  |
| SA         | CC404    | Y12          |                   | <i>Mat a</i> , <i>ura3::KanMX</i> , <i>ho::HygMX</i>                                                                                                  |
| WE         | YGL 2753 | CC401        | <i>rnr4::URA3</i> | <i>Mat a</i> , <i>ura3::KanMX</i> , <i>ho::HygMX</i> ,<br><i>rnr4::URA3</i>                                                                           |
| SA         | YGL 2754 | CC404        | <i>rnr4::URA3</i> | <i>Mat a</i> , <i>ura3::KanMX</i> , <i>ho::HygMX</i> ,<br><i>rnr4::URA3</i>                                                                           |
| WA/WE      | YGL2480  | CC423        | <i>rnr4::NAT</i>  | <i>MATa/a</i> ,<br><i>ura3::KanMX/ura3::KanMX</i> ,<br><i>ho::HygMX/ho::HygMX</i> ,<br><i>LYS2/lys2::URA3</i> , <i>WA RNR4/WE</i><br><i>rnr4::NAT</i> |
| NA/WE      | YGL2481  | CC432        | <i>rnr4::NAT</i>  | <i>MATa/a</i> ,<br><i>ura3::KanMX/ura3::KanMX</i> ,<br><i>ho::HygMX/ho::HygMX</i> ,<br><i>LYS2/lys2::URA3</i> , <i>WE RNR4/NA</i><br><i>rnr4::NAT</i> |
| NA/WE      | YGL2482  | CC432        | <i>rnr4::NAT</i>  | <i>MATa/a</i> ,<br><i>ura3::KanMX/ura3::KanMX</i> ,<br><i>ho::HygMX/ho::HygMX</i> ,<br><i>LYS2/lys2::URA3</i> , <i>WE rnr4::NAT/NA</i><br><i>RNR4</i> |
| SA/WE      | YGL2483  | CC444        | <i>rnr4::NAT</i>  | <i>MATa/a</i> ,<br><i>ura3::KanMX/ura3::KanMX</i> ,<br><i>ho::HygMX/ho::HygMX</i> ,<br><i>LYS2/lys2::URA3</i> , <i>SA RNR4/WE</i><br><i>rnr4::NAT</i> |
| WE/WE      | YGL2427  |              | <i>rnr4::URA3</i> | <i>mat a/@</i> ; <i>ura3Δ0</i> ; <i>ura3Δ0</i> ; <i>leu2Δ0</i> ;<br><i>leu2Δ0</i> ; <i>lys2Δ0</i> ; <i>met15Δ0</i> ;<br><i>RNR4/rnr4::URA3</i>        |
| SA/SA      | YGL2428  |              | <i>rnr4::URA3</i> | <i>mat a/@</i> ; <i>ura3Δ0</i> ; <i>ura3Δ0</i> ; <i>leu2Δ0</i> ;<br><i>leu2Δ0</i> ; <i>lys2Δ0</i> ; <i>met15Δ0</i> ;<br><i>RNR4/rnr4::URA3</i>        |

|       |         |                          |                   |                                                                                                    |
|-------|---------|--------------------------|-------------------|----------------------------------------------------------------------------------------------------|
| SA    | YGL2495 | CC404                    | <i>tor1::URA3</i> | <i>Mat a, ura3::KanMX, ho::HygMX, tor1::URA3</i>                                                   |
| WE    | YGL2486 | CC401                    | <i>tor1::URA3</i> | <i>Mat a, ura3::KanMX, ho::HygMX, tor1::URA3</i>                                                   |
| WE/WE | YGL2441 |                          | <i>tor1::URA3</i> | <i>mat a/@; ura3Δ0; ura3Δ0; leu2Δ0; leu2Δ0; lys2Δ0; met15Δ0; TOR1/tor1::URA3</i>                   |
| SA/SA | YGL2445 |                          | <i>tor1::URA3</i> | <i>mat a/@; ura3Δ0; ura3Δ0; leu2Δ0; leu2Δ0; lys2Δ0; met15Δ0; TOR1/tor1::URA3</i>                   |
| WE/SA | YGL2497 | YGL2486 cross with CC408 | <i>tor1::URA3</i> | <i>MATa/a, ura3::KanMX/ura3::KanMX, ho::HygMX/ho::HygMX, LYS2/lys2::URA3, WE tor1::URA3/SA</i>     |
| WE/SA | YGL2498 | YGL2495 cross with CC405 | <i>tor1::URA3</i> | <i>MATa/a, ura3::KanMX/ura3::KanMX, ho::HygMX/ho::HygMX, LYS2/lys2::URA3, SA tor1::URA3/WE</i>     |
| WE/WE | YGL2443 |                          | <i>tor2::URA3</i> | <i>mat a/@; ura3Δ0; ura3Δ0; leu2Δ0; leu2Δ0; lys2Δ0; met15Δ0; TOR2/tor2::URA3</i>                   |
| SA/SA | YGL2447 |                          | <i>tor2::URA3</i> | <i>mat a/@; ura3Δ0; ura3Δ0; leu2Δ0; leu2Δ0; lys2Δ0; met15Δ0; TOR2/tor2::URA3</i>                   |
| NA/NA | YGL2501 | CC440                    | <i>tor2::NAT</i>  | <i>MATa/a, ura3::KanMX/ura3::KanMX, ho::HygMX/ho::HygMX, LYS2/lys2::URA3, NA TOR2/NA tor2::NAT</i> |
| SA/WE | YGL2914 | CC444                    | <i>tor2::NAT</i>  | <i>MATa/a, ura3::KanMX/ura3::KanMX, ho::HygMX/ho::HygMX, LYS2/lys2::URA3, WE tor2::NAT/SA TOR2</i> |
| SA/WE | YGL2915 | CC444                    | <i>tor2::NAT</i>  | <i>MATa/a, ura3::KanMX/ura3::KanMX, ho::HygMX/ho::HygMX, LYS2/lys2::URA3, SA tor2::NAT/WE TOR2</i> |
| SA    | YGL2492 | CC404                    | <i>tor2::URA3</i> | <i>Mat a, ura3::KanMX, ho::HygMX, tor2::URA3</i>                                                   |
| WE    | YGL2326 | CC401                    | <i>fpr1::URA3</i> | <i>Mat a, ura3::KanMX, ho::HygMX, fpr1::URA3</i>                                                   |
| SA    | YGL2332 | CC404                    | <i>fpr1::URA3</i> | <i>Mat a, ura3::KanMX, ho::HygMX, fpr1::URA3</i>                                                   |
|       | OS528   | 1002G project            |                   | <i>TOR1 2000 Q/H</i>                                                                               |
|       | OS227   | 1002G project            |                   | <i>TOR1 2000 Q/Q</i>                                                                               |
|       | OS1397  | 1002G project            |                   | <i>TOR2 2047 L/L</i>                                                                               |
|       | OS821   | 1002G project            |                   | <i>TOR2 2047 L/V</i>                                                                               |



|  |       |               |  |                      |
|--|-------|---------------|--|----------------------|
|  | OS723 | 1002G project |  | <i>TOR2 2047 V/V</i> |
|--|-------|---------------|--|----------------------|

1

1 **Table S10 Primers used in this study**

| Gene          | Marker      | Primers                                                                                                        | Description                                                                                                                                         |                                                                                               |
|---------------|-------------|----------------------------------------------------------------------------------------------------------------|-----------------------------------------------------------------------------------------------------------------------------------------------------|-----------------------------------------------------------------------------------------------|
| RNR4_FW_NAT   | <i>NAT</i>  | ATACTGTACCTAGGTATATATAAATATATA<br>TAAATAAAAGTGGCCAAGAATAAAAGAAC<br>GCACCCCGTCGTTGACTcgtacgctgcaggctgac         | Sequence of primers used to engineer gene deletions: upper case correspond to targeted deletion regions, lower case to marker amplification regions |                                                                                               |
| RNR4_RV_NAT   | <i>NAT</i>  | AAATAAAAAATTGCTAATACAAAAACAGA<br>TCTTTTTGAGCCACACAACCCCGCGCAACG<br>CACACAATTAGTTATTACAatc gatgaattcgagct<br>cg |                                                                                                                                                     |                                                                                               |
| RNR4_FW_URA3  | <i>URA3</i> | TACAAAAACAGATCTTTTTGAGCCACACAA<br>CCCCGCGCAACGCACACAATTAGTTATTAC<br>Acggcatcagagcagattgtactg                   |                                                                                                                                                     |                                                                                               |
| RNR4_RV_URA3  | <i>URA3</i> | TATATATAAATATATATAAATAAAAGTGGC<br>CAAGAATAAAAGAACGCACCCCGTCGTTG<br>ACacaccgcaggtaataactg                       |                                                                                                                                                     |                                                                                               |
| TOR1_FW_URA3  | <i>URA3</i> | TCACGAGAGAGTCATTGGTAAAGTGAAAC<br>ATACATCAACCGGCTAGCAGGTTTGCATTG<br>ATcggcatcagagcagattgtactg                   |                                                                                                                                                     |                                                                                               |
| TOR1_RV_URA3  | <i>URA3</i> | AATGCGTAATACAAAAAATAAATAGTA<br>AACAAAGCACGAAATGAAAAATGACACCG<br>CAGacaccgcaggtaataactg                         |                                                                                                                                                     |                                                                                               |
| TOR2_FW_URA3  | <i>URA3</i> | CATTTTTATACAACACTTTTACAGGCTATAT<br>ACAATAAGTGATTTTCAATACATTA AAC<br>cggcatcagagcagattgtactg                    |                                                                                                                                                     |                                                                                               |
| TOR2_RV_URA3  | <i>URA3</i> | AAGATCAAATAGTTATCTTTCTCAAAGAGA<br>TTTCTGATCTTTACTTTCCCATATGAAAAA<br>acaccgcaggtaataactg                        |                                                                                                                                                     |                                                                                               |
| TOR2_FW_NAT   | <i>NAT</i>  | CATTTTTATACAACACTTTTACAGGCTATAT<br>ACAATAAGTGATTTTCAATACATTA AAC<br>cgtacgctgcaggctgac                         |                                                                                                                                                     |                                                                                               |
| TOR2_RV_NAT   | <i>NAT</i>  | AAGATCAAATAGTTATCTTTCTCAAAGAGA<br>TTTCTGATCTTTACTTTCCCATATGAAAAA<br>atc gatgaattcgagctcg                       |                                                                                                                                                     |                                                                                               |
| FPR1_FW_URA3  | <i>URA3</i> | TAAAGTAAGGCCTTTCACCTAAACTCGAGT<br>ATAAGCAAAAAATCAATCAAAACAAGTAA<br>TAcggcatcagagcagattgtactg                   |                                                                                                                                                     |                                                                                               |
| FPR1_RV_URA3  | <i>URA3</i> | GATACTTACCATAAACATAAATAAAAAGC<br>AGAAAGGCGGCTCAATTGATAGTACTTTGC<br>TTacaccgcaggtaataactg                       |                                                                                                                                                     |                                                                                               |
| RNR4_DN_FW    |             | TGGAAGCACATAACCAATTTT                                                                                          |                                                                                                                                                     | Sequence of primers used to amplify the regions with putative driver mutations for genotyping |
| RNR4_DN_RV    |             | CAAAGTTAATTCCTTGGATG                                                                                           |                                                                                                                                                     |                                                                                               |
| TOR1_DN_FW    |             | AGCCAGATCCTACGGTGAGT                                                                                           |                                                                                                                                                     |                                                                                               |
| TOR1_DN_RV    |             | CCCAGGAACAGCCAATTCGA                                                                                           |                                                                                                                                                     |                                                                                               |
| TOR2_DN_FW    |             | TTGGCGACACATGTTGTAGTT                                                                                          |                                                                                                                                                     |                                                                                               |
| TOR2_DN_RV    |             | AGCAATCCAGATTCGATCCT                                                                                           |                                                                                                                                                     |                                                                                               |
| FPR1_DN_FW    |             | TGCCACCTTCCCAAAGACAG                                                                                           |                                                                                                                                                     |                                                                                               |
| FPR1_DN_RV    |             | CCCTCCTGCCACAAGAGTTT                                                                                           |                                                                                                                                                     |                                                                                               |
| IX MMF1 RT FW |             | TTGAACAGGCTTGTTATCTGG                                                                                          | qPCR to confirm                                                                                                                                     |                                                                                               |

|               |  |                       |                     |
|---------------|--|-----------------------|---------------------|
| IX_MMFI_RT_RV |  | TTCCGTTTTGAGAACAGCTCC | chrIX amplification |
| IX_STS1_RT_FW |  | TAAAGGGCGAATCAGTAGCA  |                     |
| IX_STS1_RT_RV |  | TTATTGGAACGCCCACTCCA  |                     |
| I_POP5_RT_FW  |  | CGGATGTGTCCATAAAGTCGA | qPCR control region |
| I_POP5_RT_RV  |  | CCATGATAACAAGGTCGCAA  |                     |

1

# Figure 1

A

bioRxiv preprint doi: <https://doi.org/10.1101/229419>; this version posted December 6, 2017. The copyright holder for this preprint (which was not certified by peer review) is the author/funder, who has granted bioRxiv a license to display the preprint in perpetuity. It is made available under aCC-BY 4.0 International license.

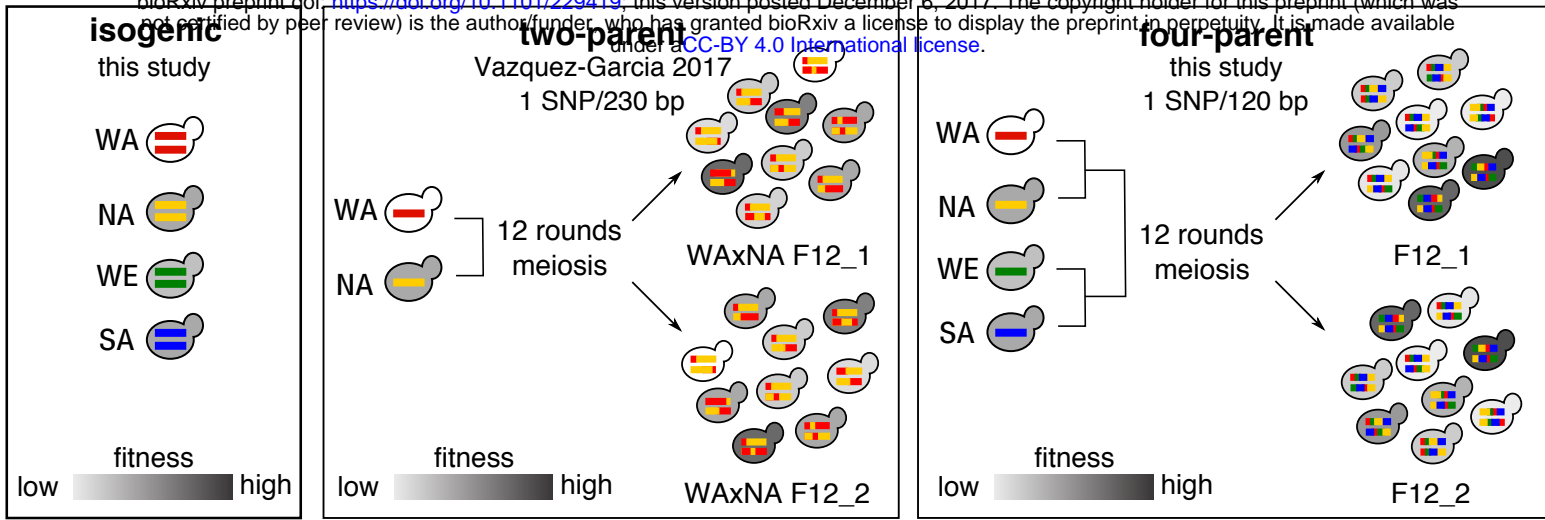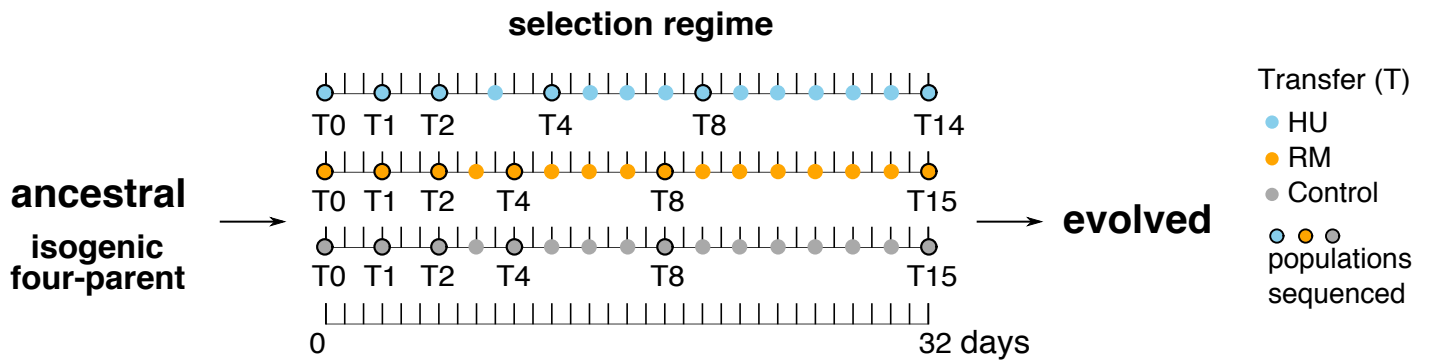

B

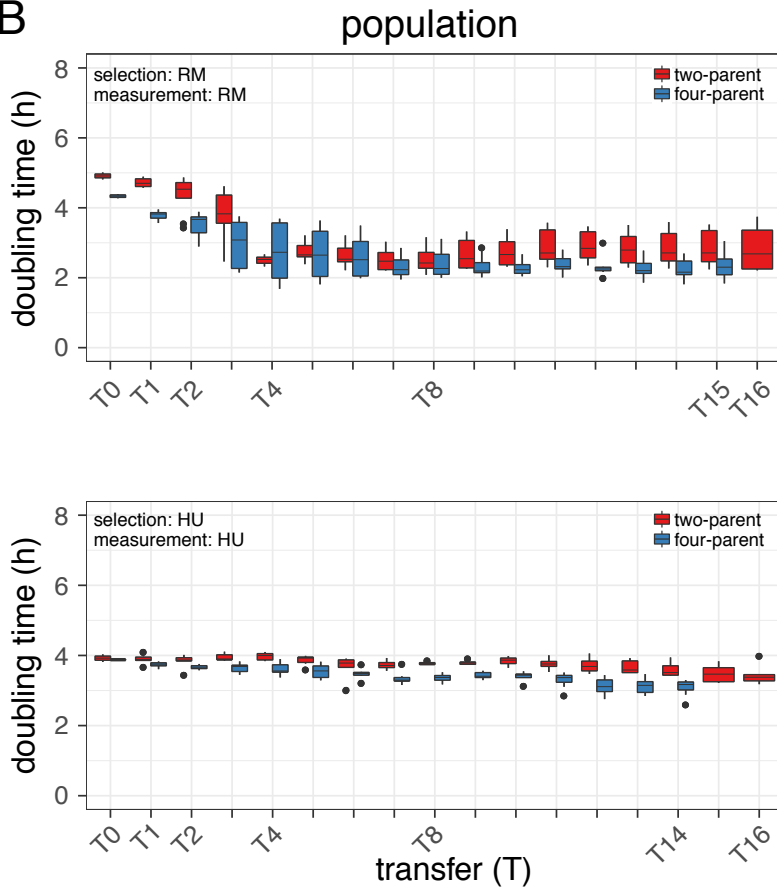

C

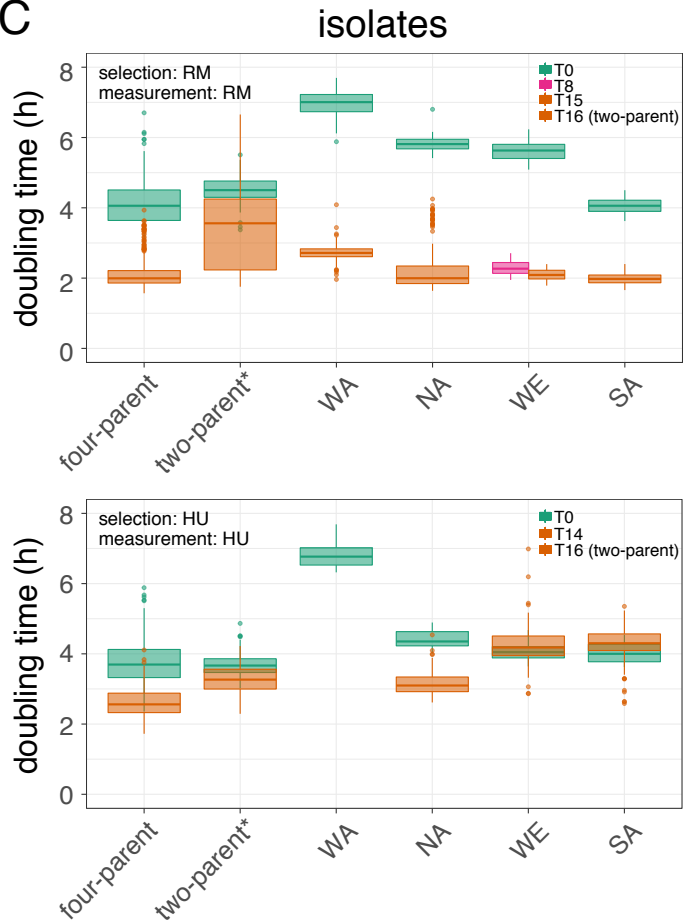

Figure 2

A

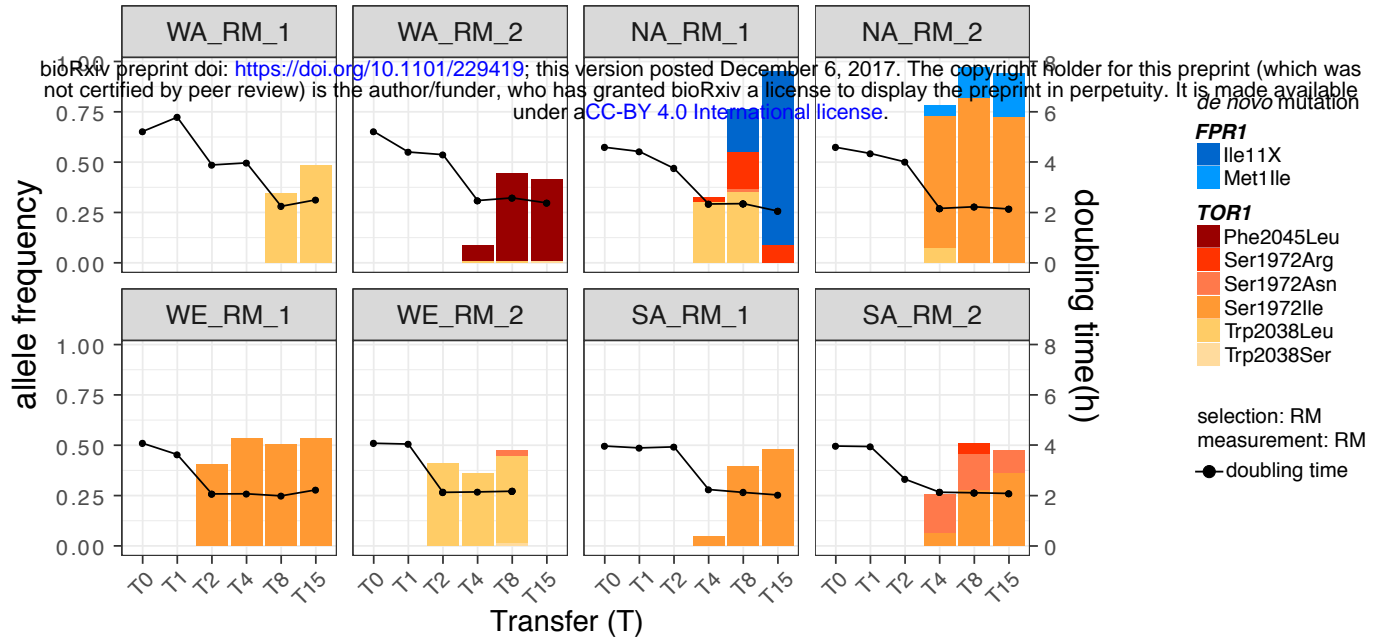

B

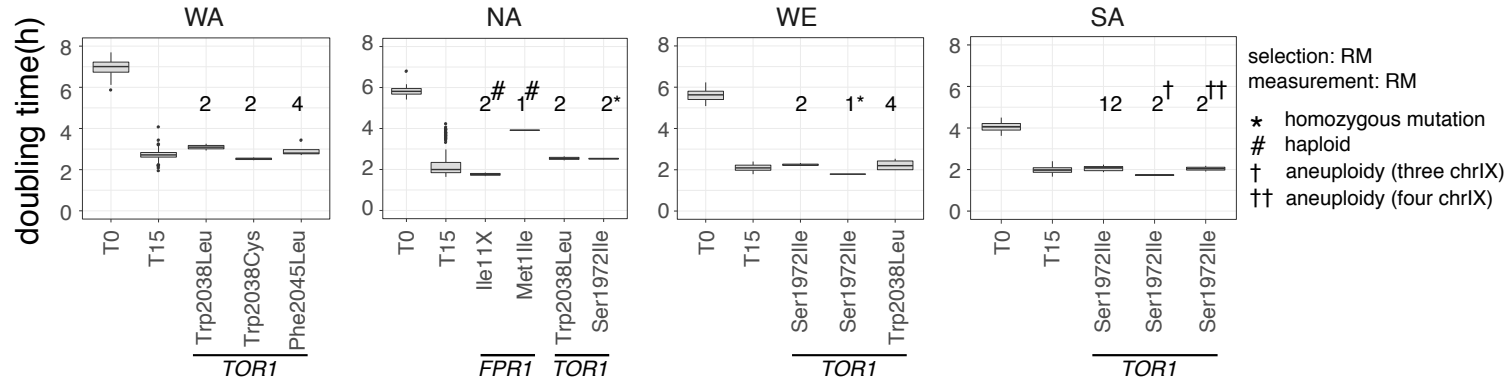

C

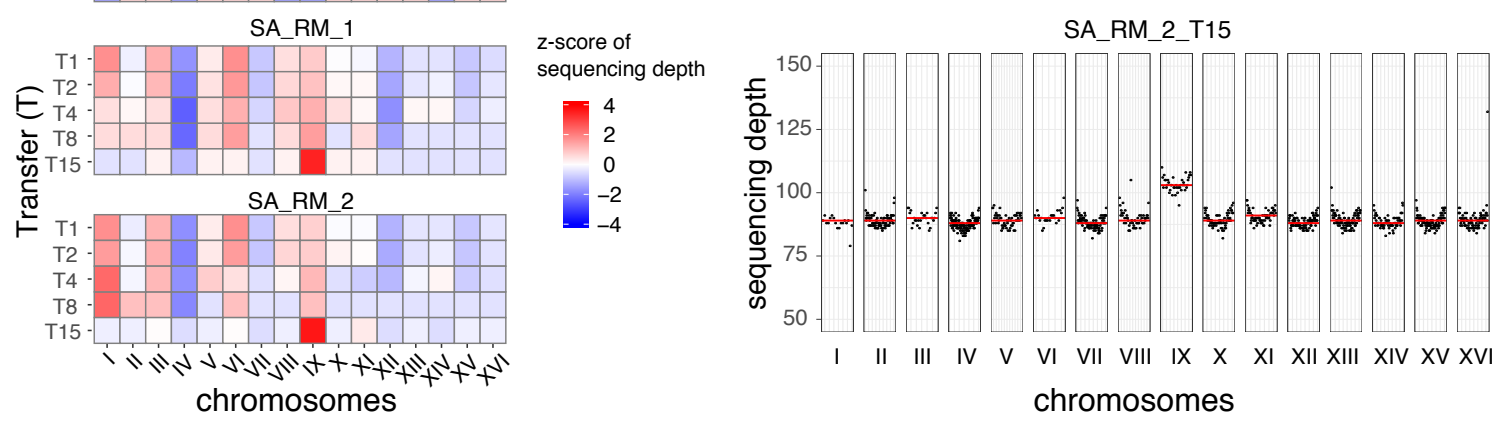

D

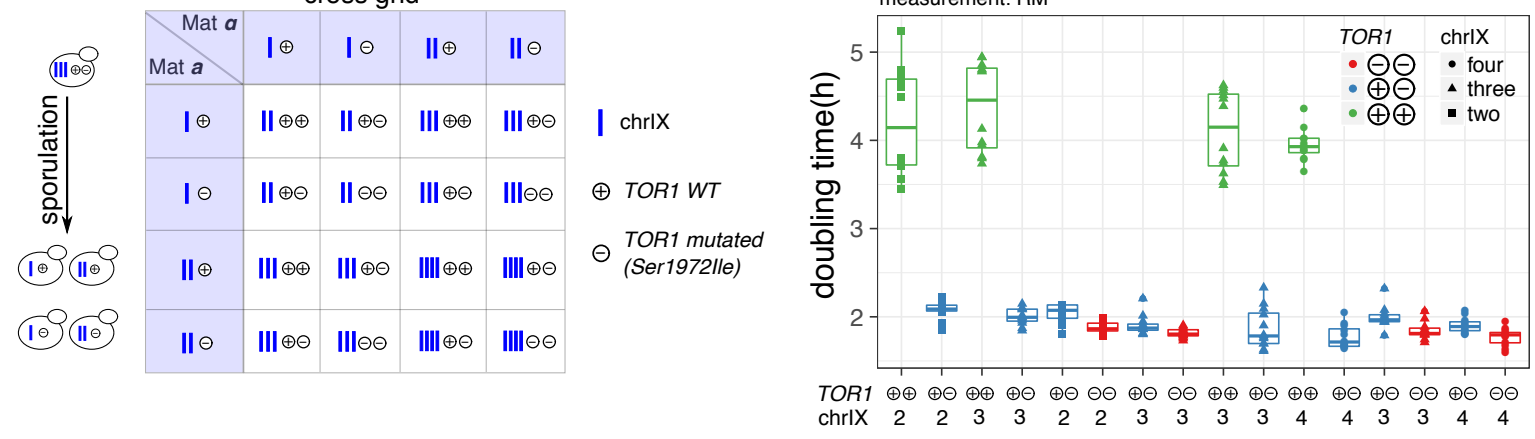

Figure 3

A

bioRxiv preprint doi: <https://doi.org/10.1101/229419>; this version posted December 6, 2017. The copyright holder for this preprint (which was not certified by peer review) is the author/funder, who has granted bioRxiv a license to display the preprint in perpetuity. It is made available under aCC-BY 4.0 International license.

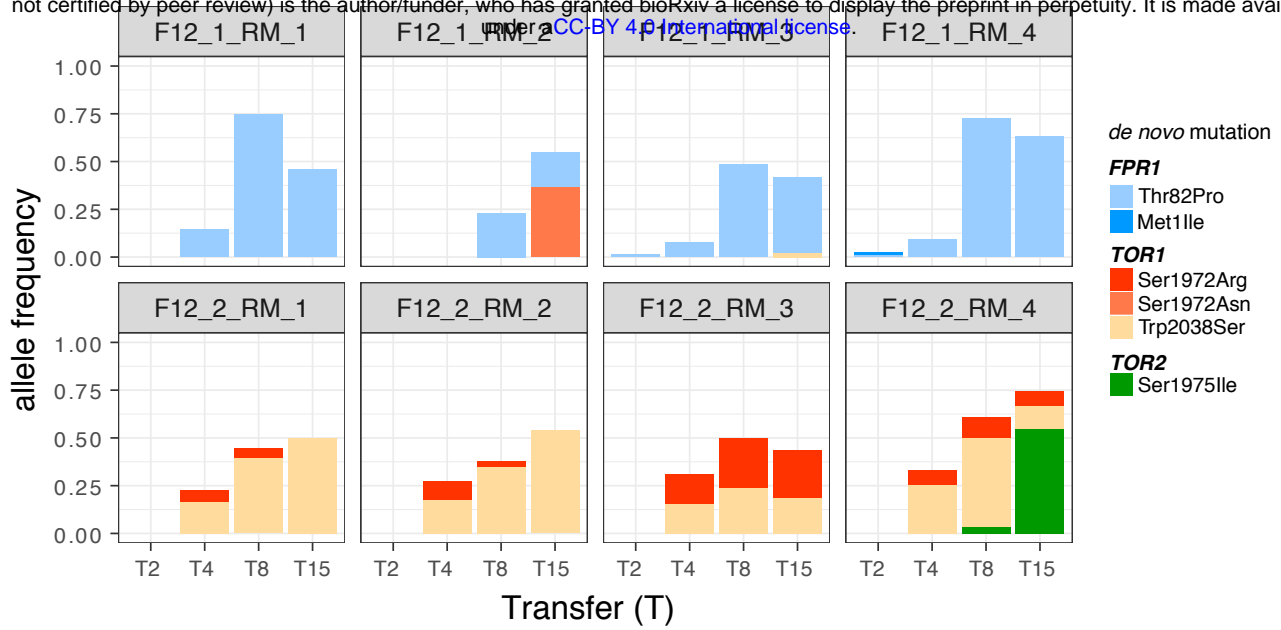

B

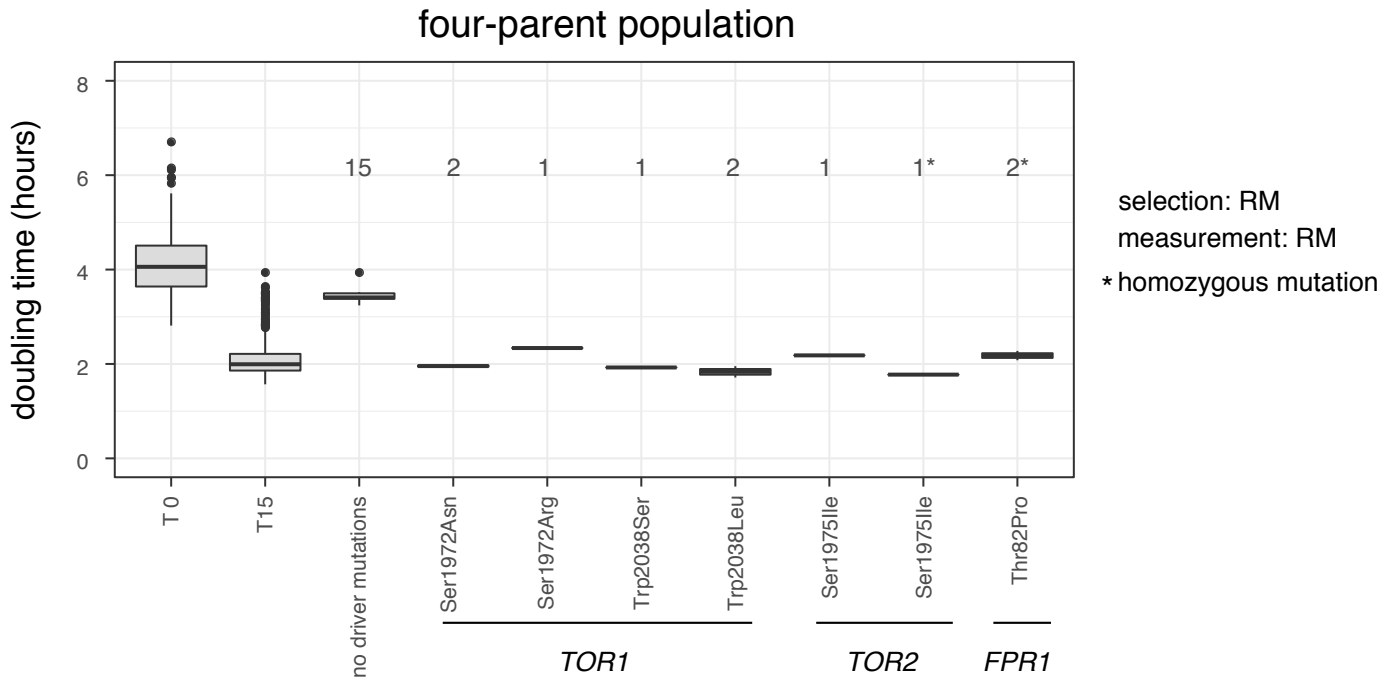

Figure 4

A

bioRxiv preprint doi: <https://doi.org/10.1101/229419>; this version posted December 6, 2017. The copyright holder for this preprint (which was not certified by peer review) is the author/funder, who has granted bioRxiv a license to display the preprint in perpetuity. It is made available under aCC-BY 4.0 International license.

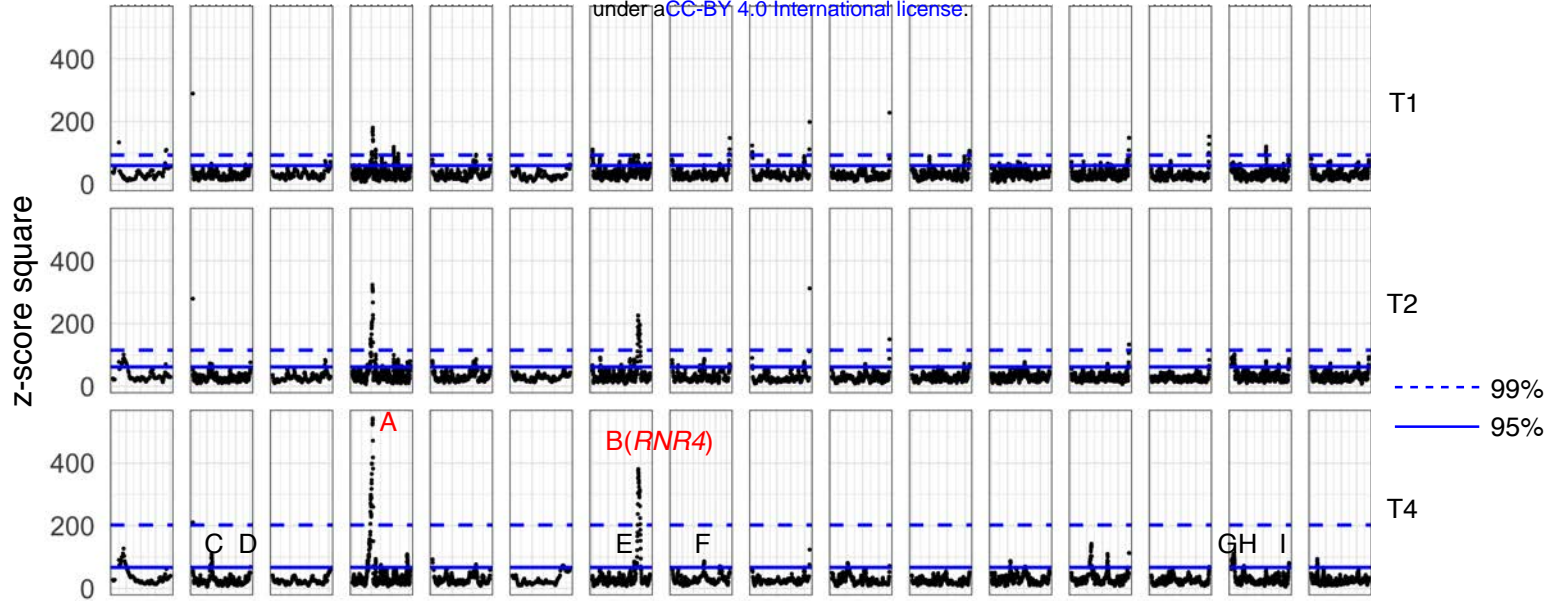

B

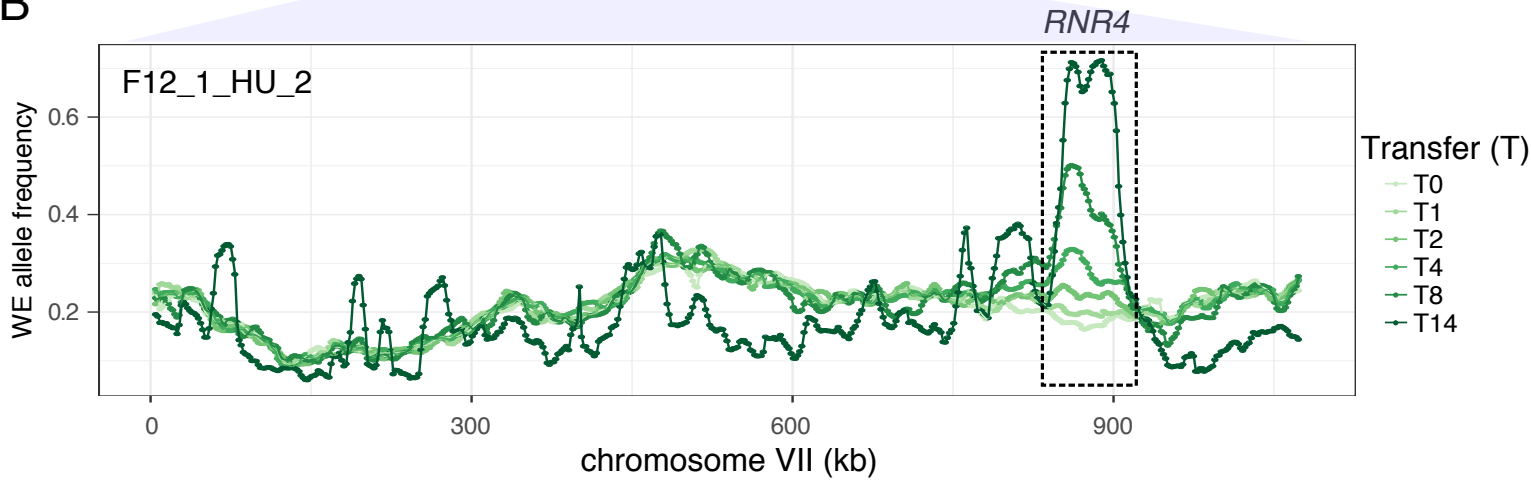

C

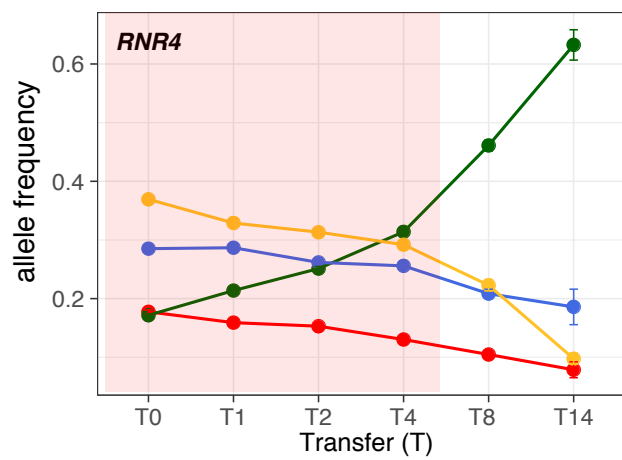

D

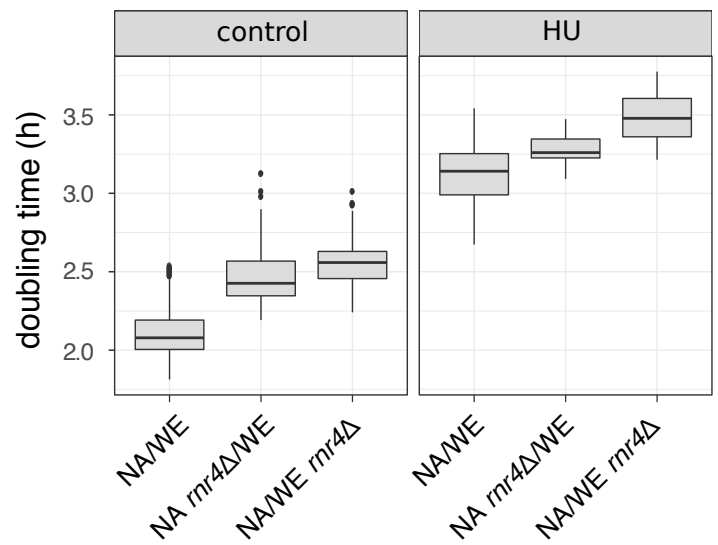

# Figure 5

bioRxiv preprint doi: <https://doi.org/10.1101/229419>; this version posted December 6, 2017. The copyright holder for this preprint (which was not certified by peer review) is the author/funder, who has granted bioRxiv a license to display the preprint in perpetuity. It is made available under aCC-BY 4.0 International license.

## A

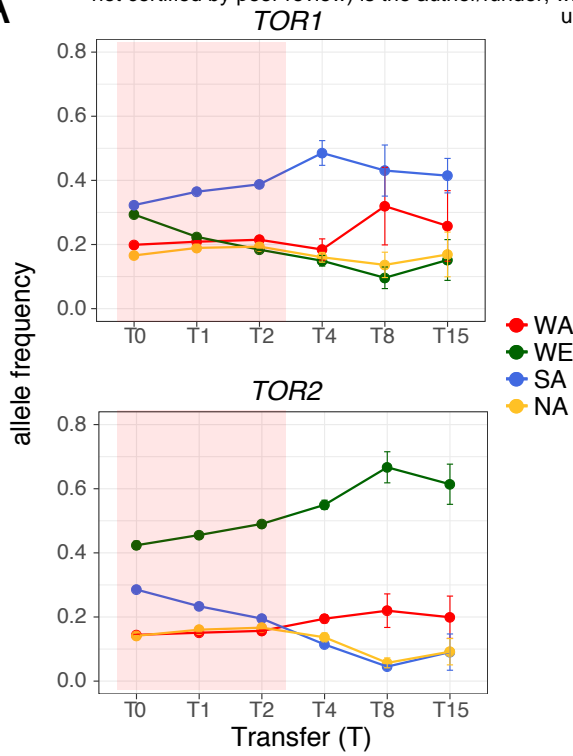

## B

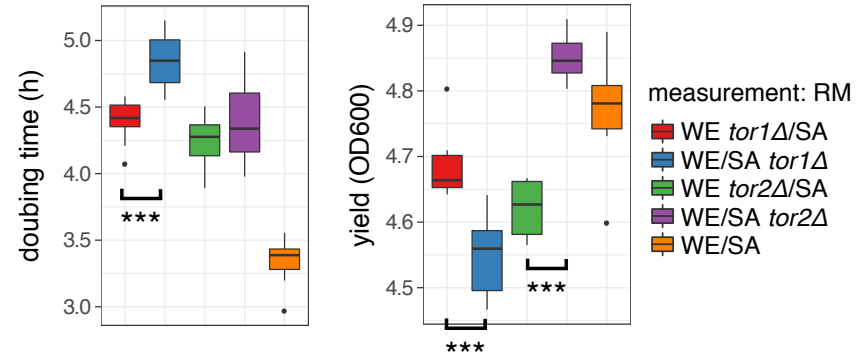

## C

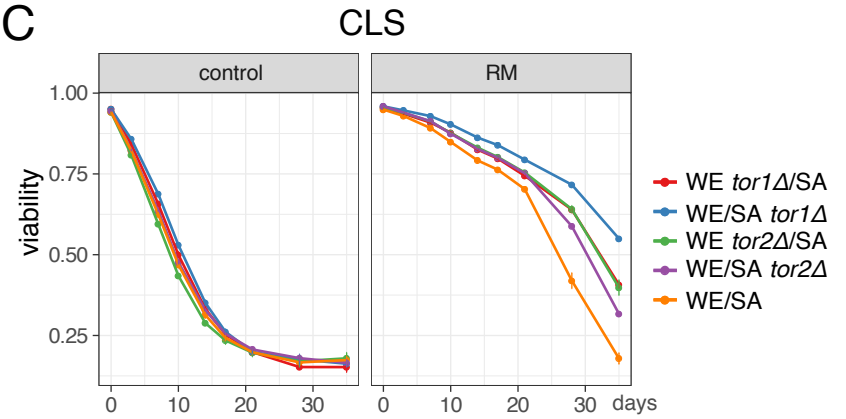

## D

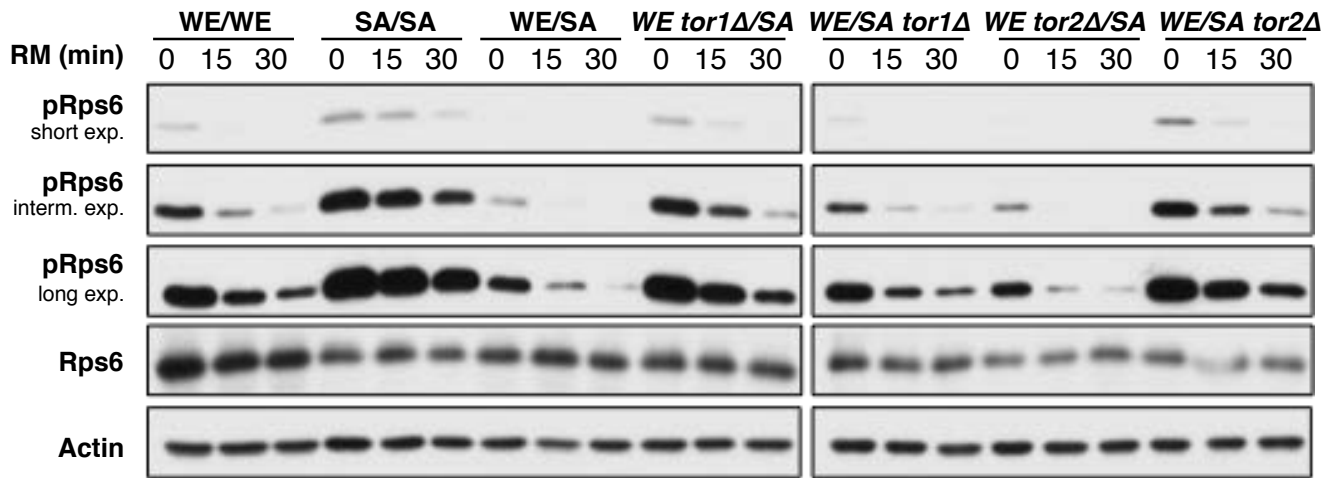

## E

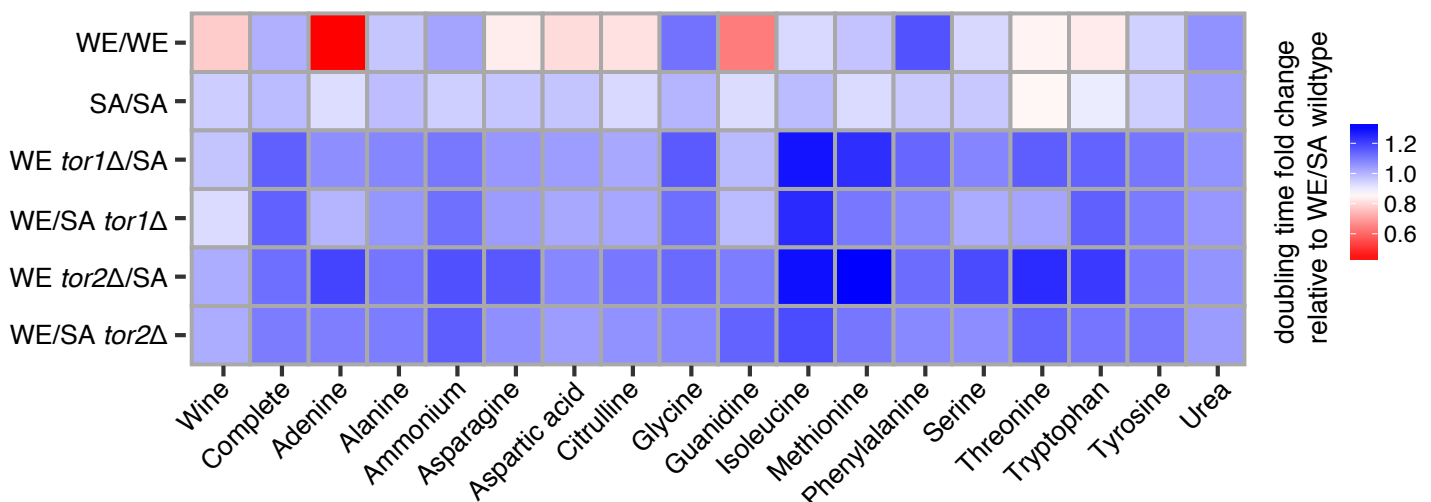



# Figure 6

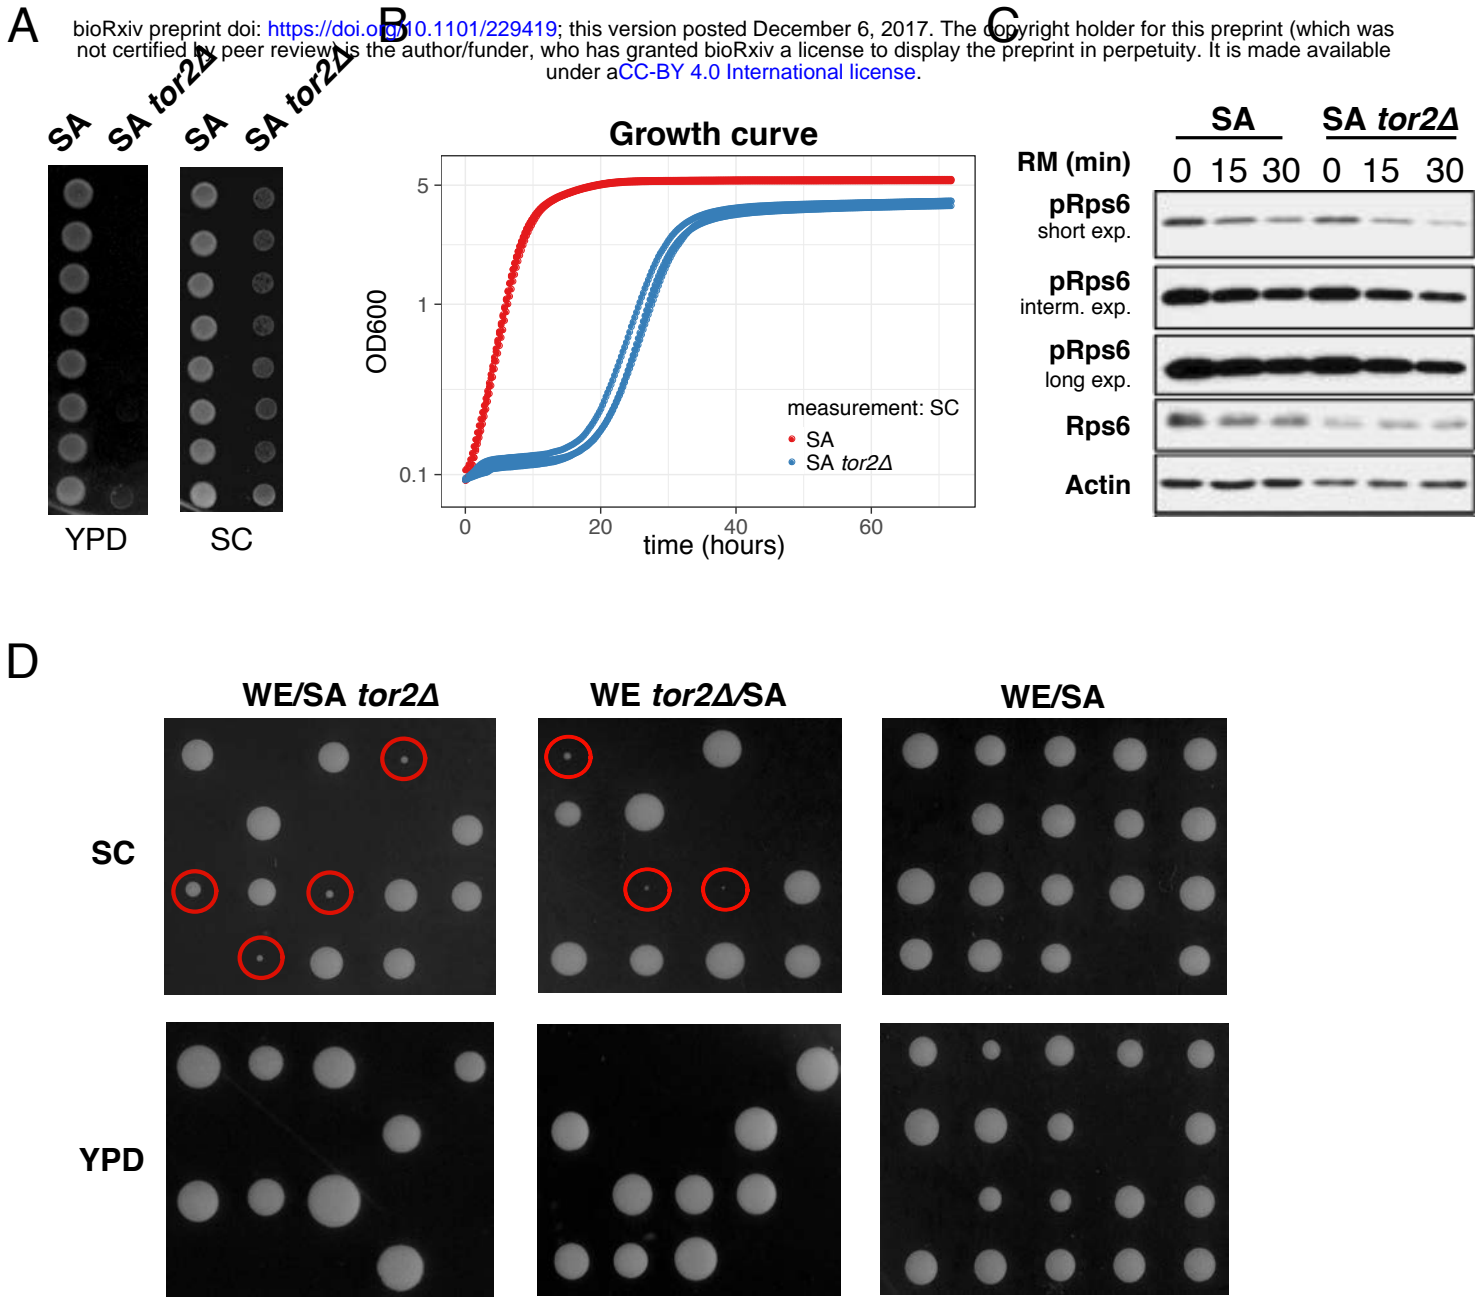

Figure S1

four-parent populations evolved in HU

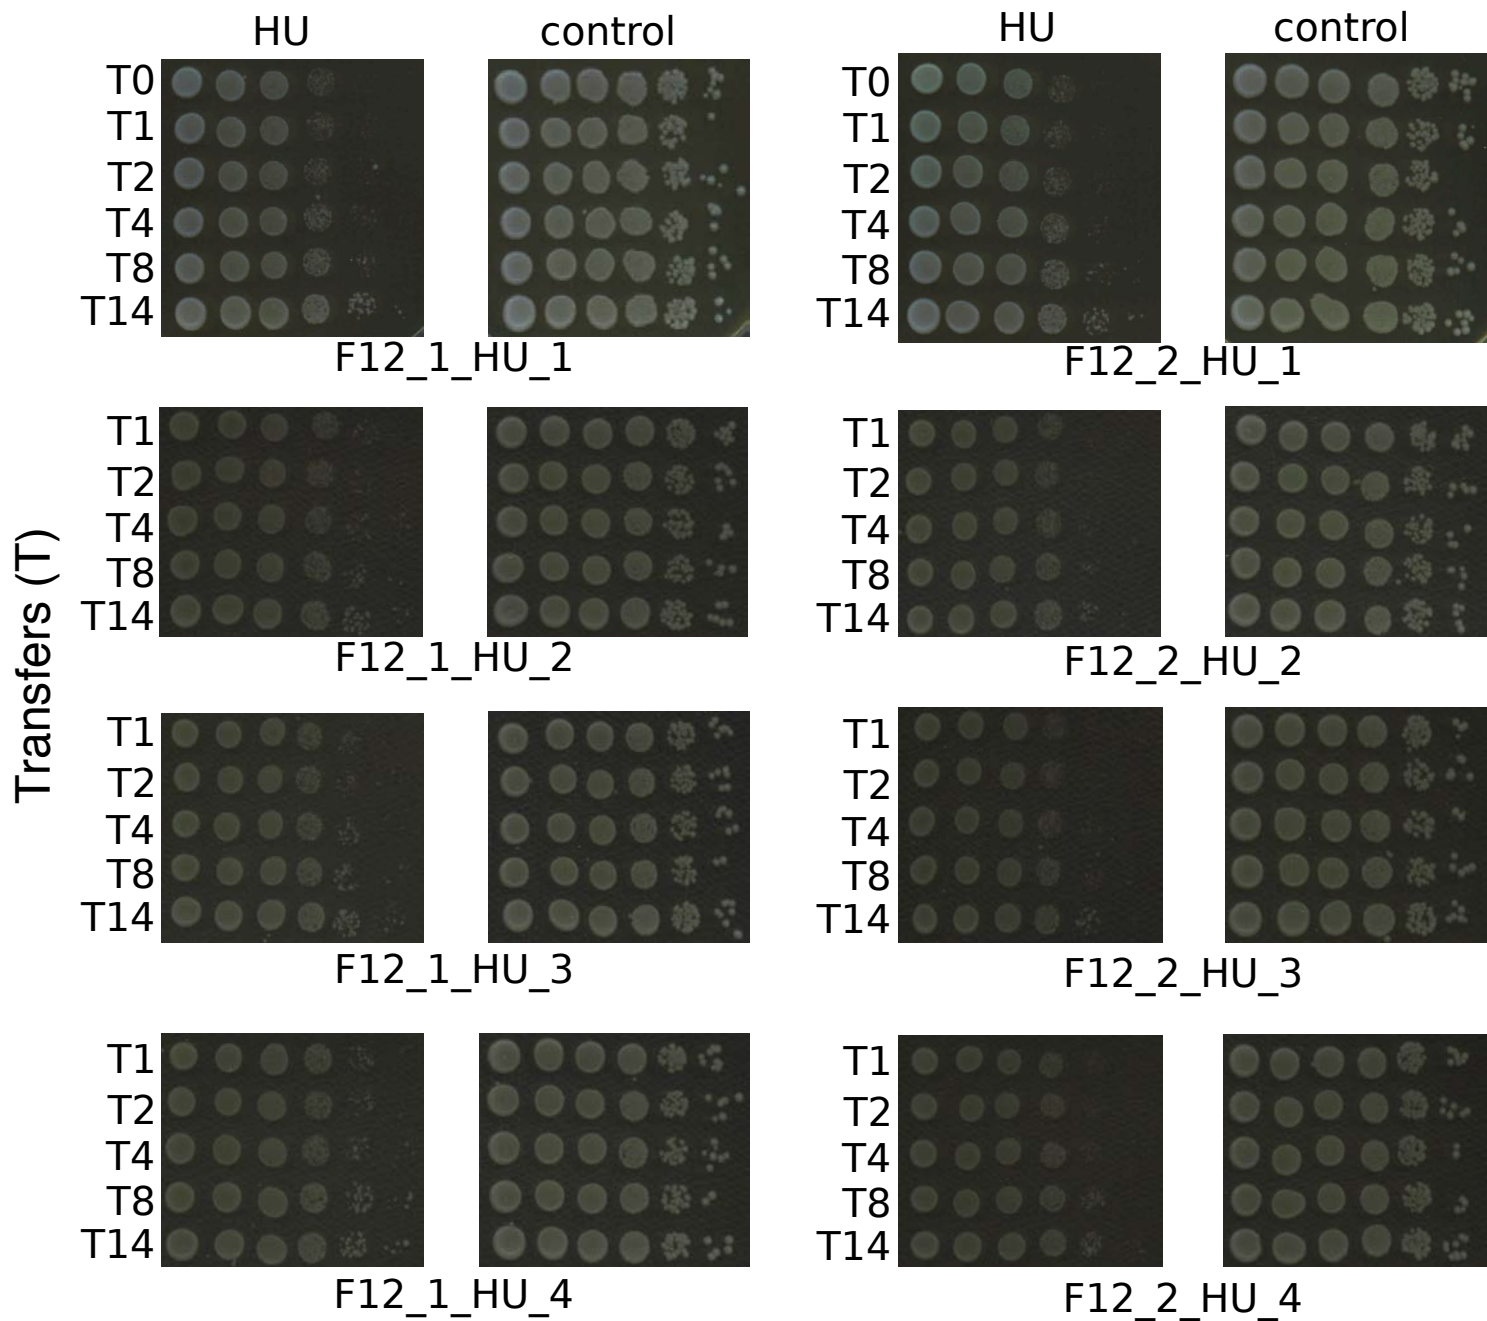

## Figure S1

### Isogenic populations evolved in HU

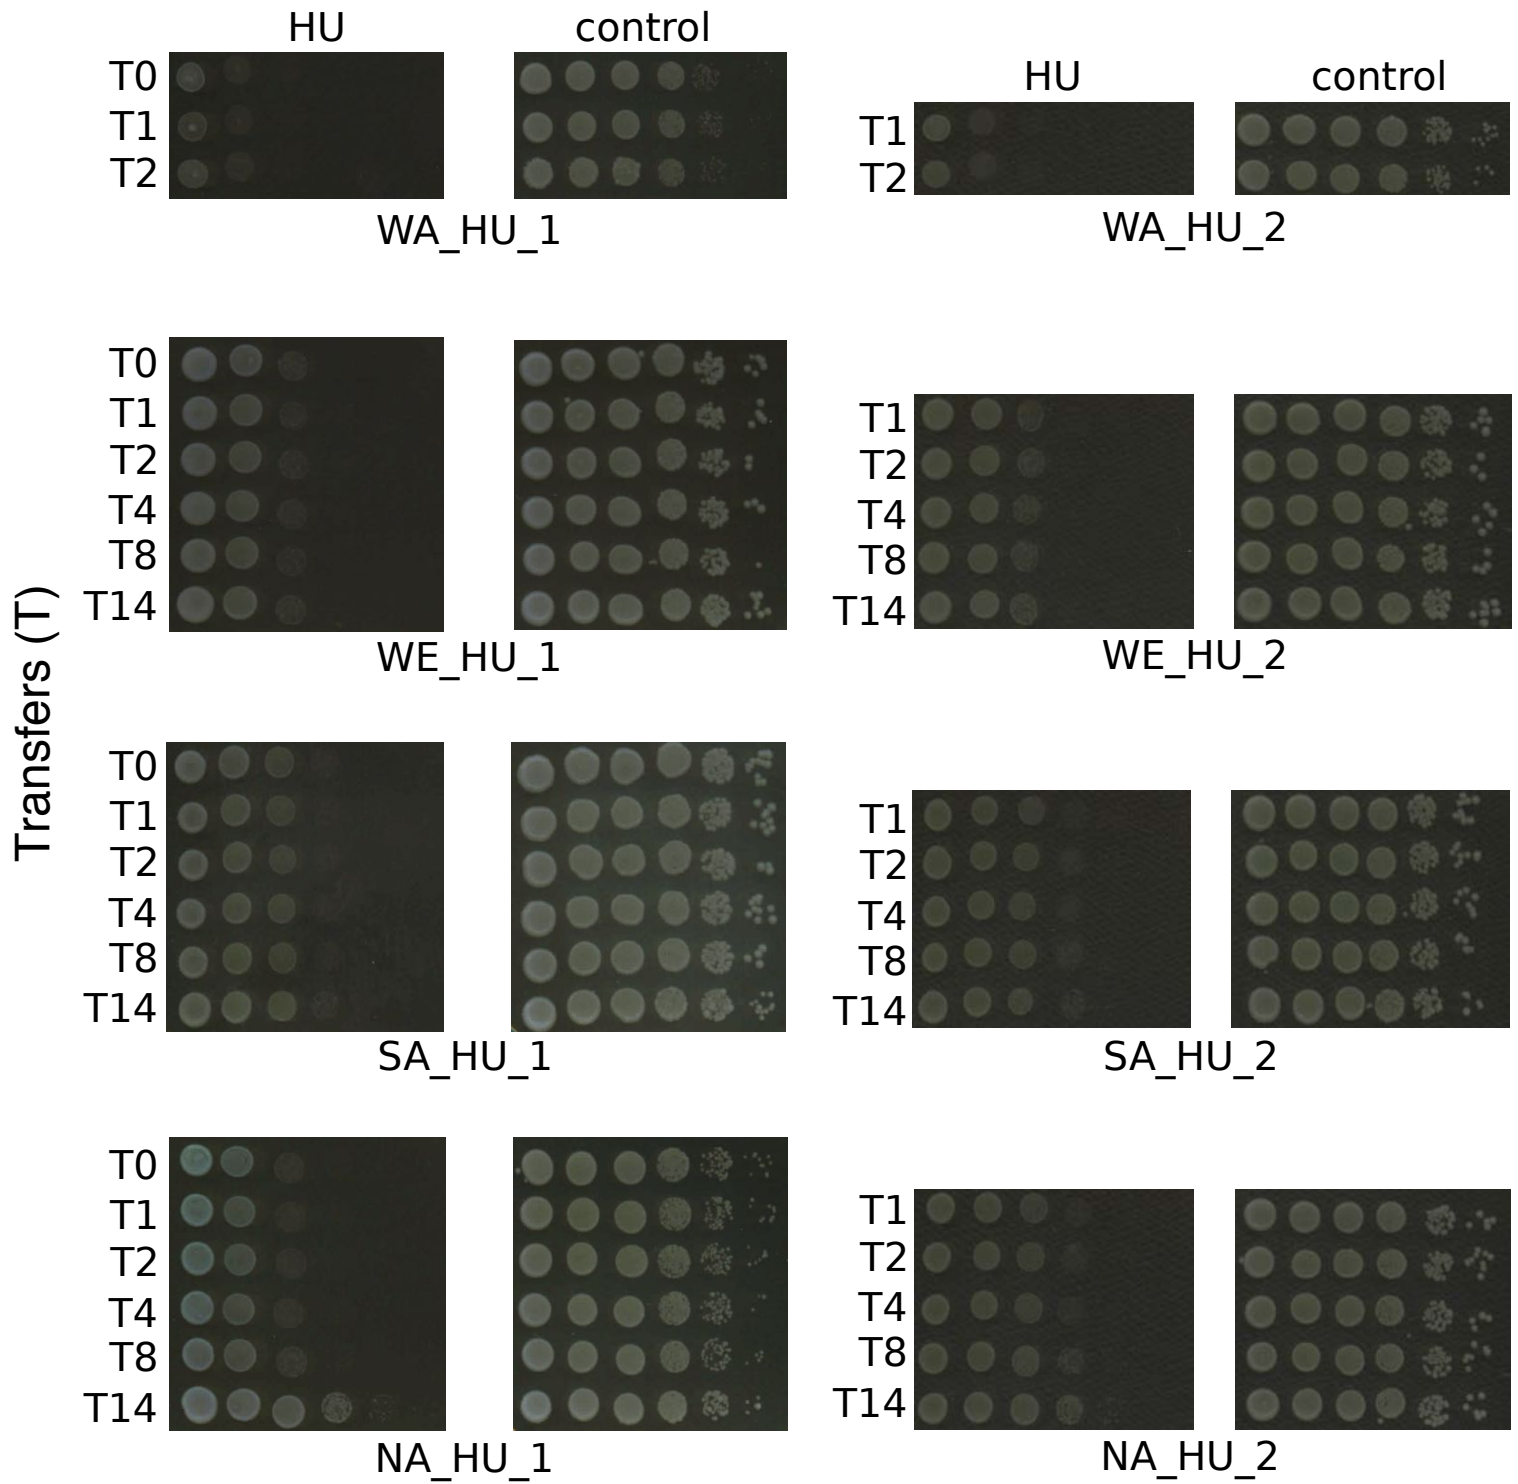

## Figure S1

### four-parent populations evolved in RM

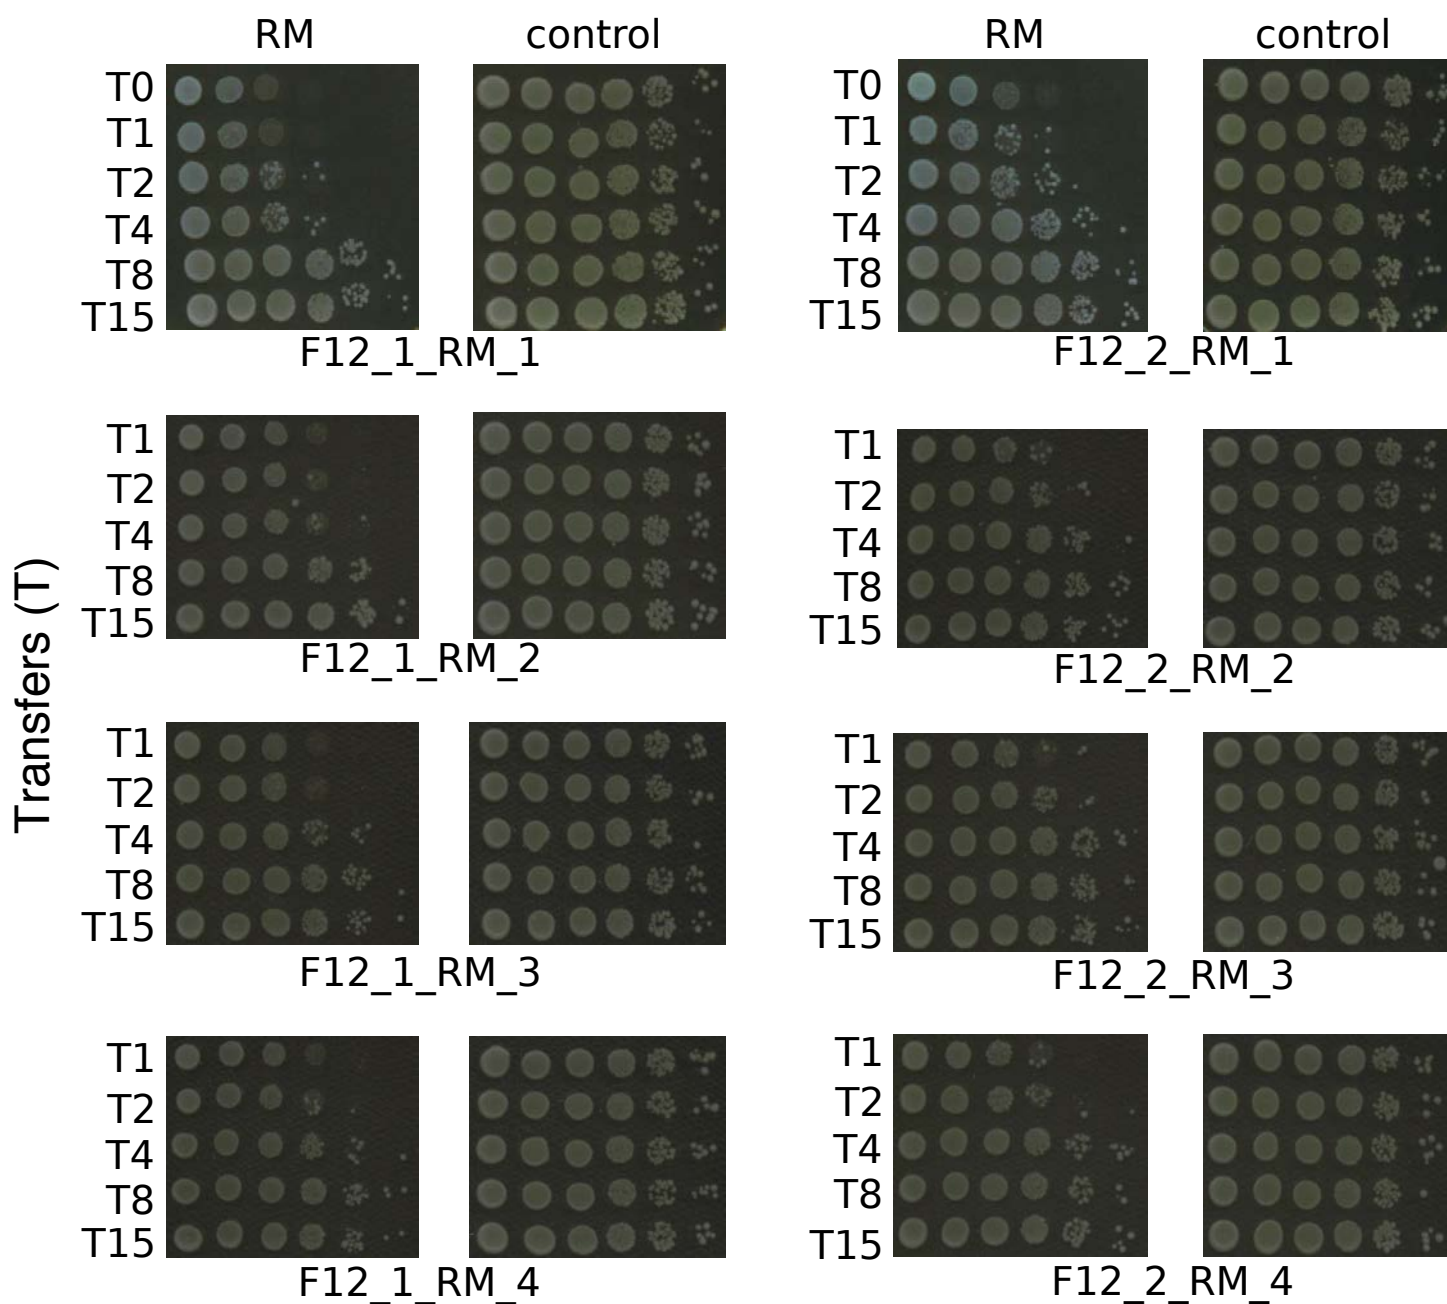

Figure S1

Isogenic populations evolved in RM

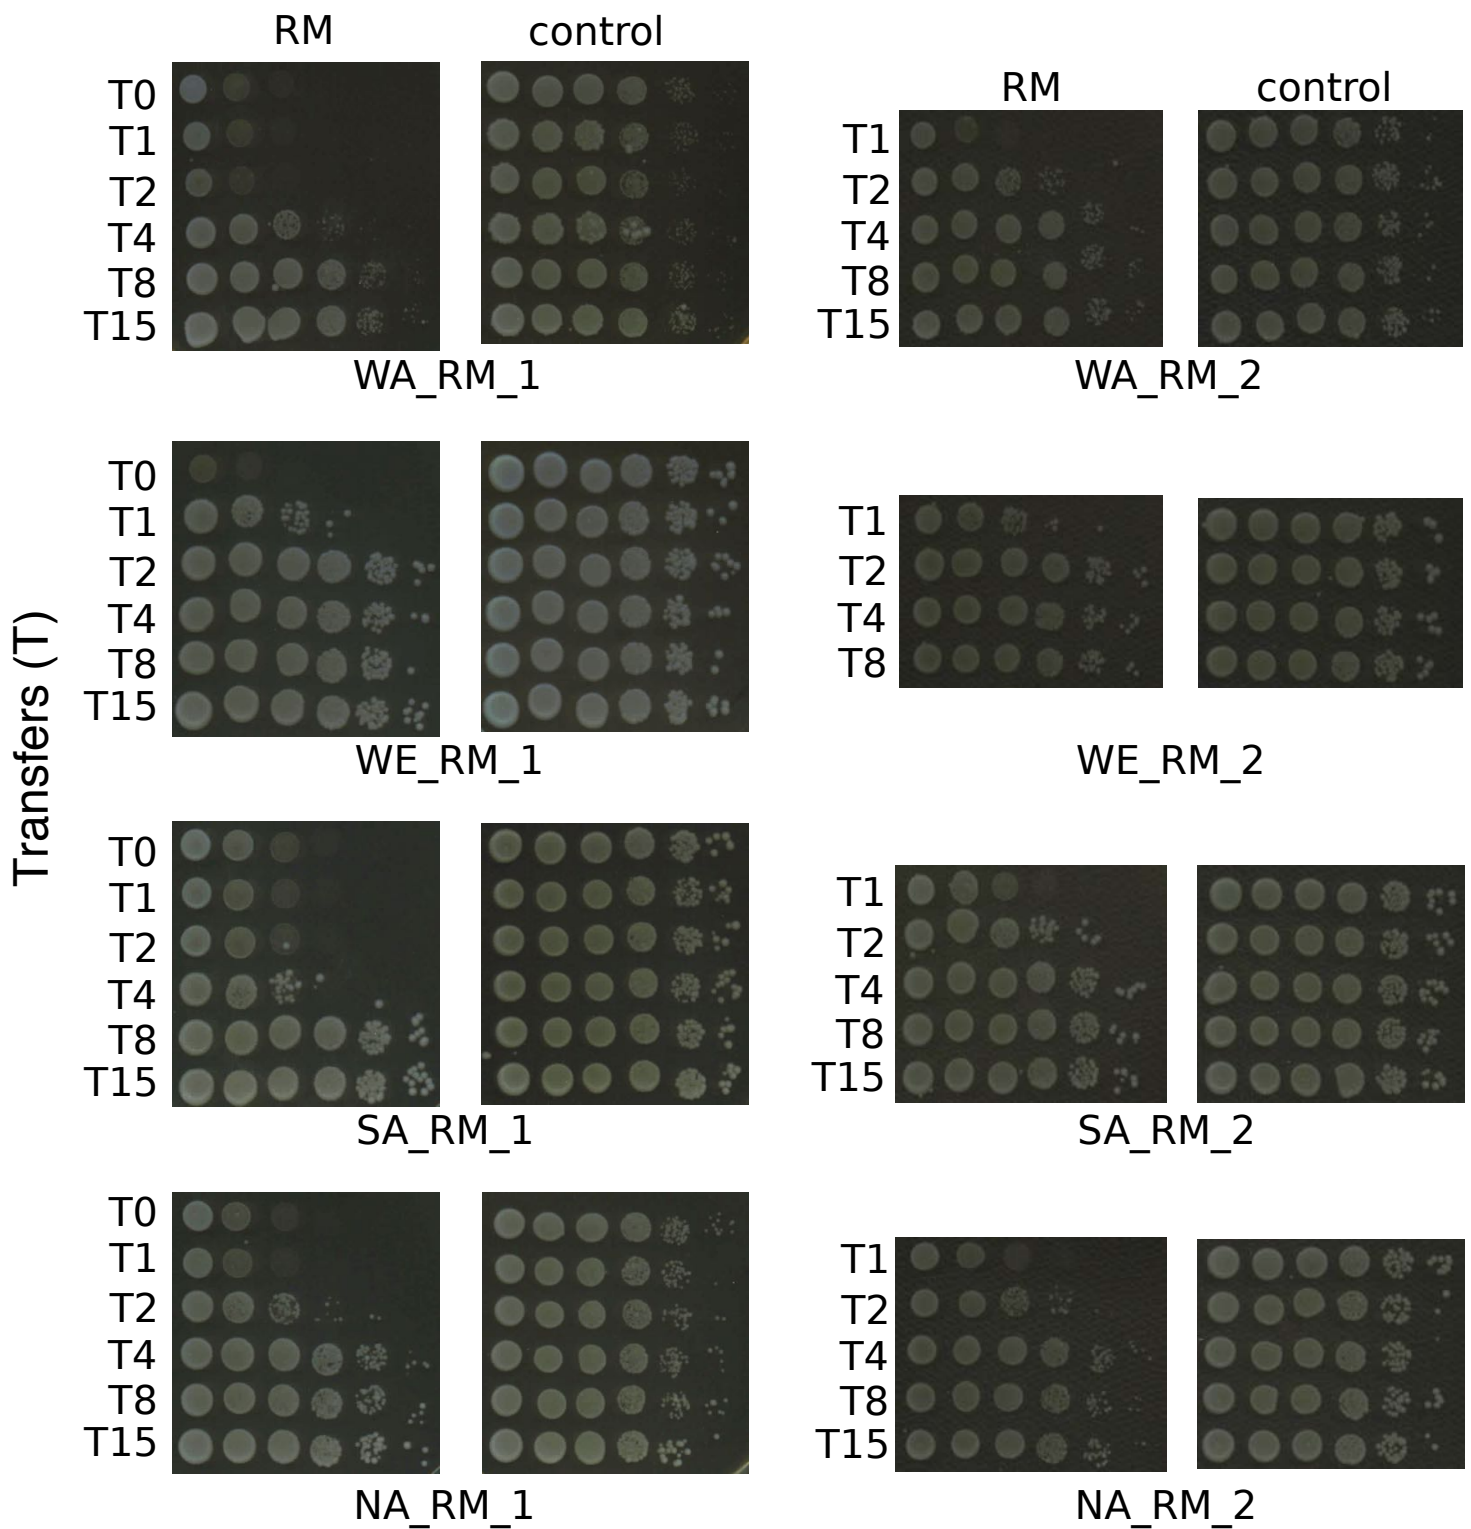

# Figure S1

bioRxiv preprint doi: <https://doi.org/10.1101/229419>; this version posted December 6, 2017. The copyright holder for this preprint (which was not certified by peer review) is the author/funder, who has granted bioRxiv a license to display the preprint in perpetuity. It is made available under a [CC-BY 4.0 International license](#).

four-parent populations evolved in drug-free condition (control)

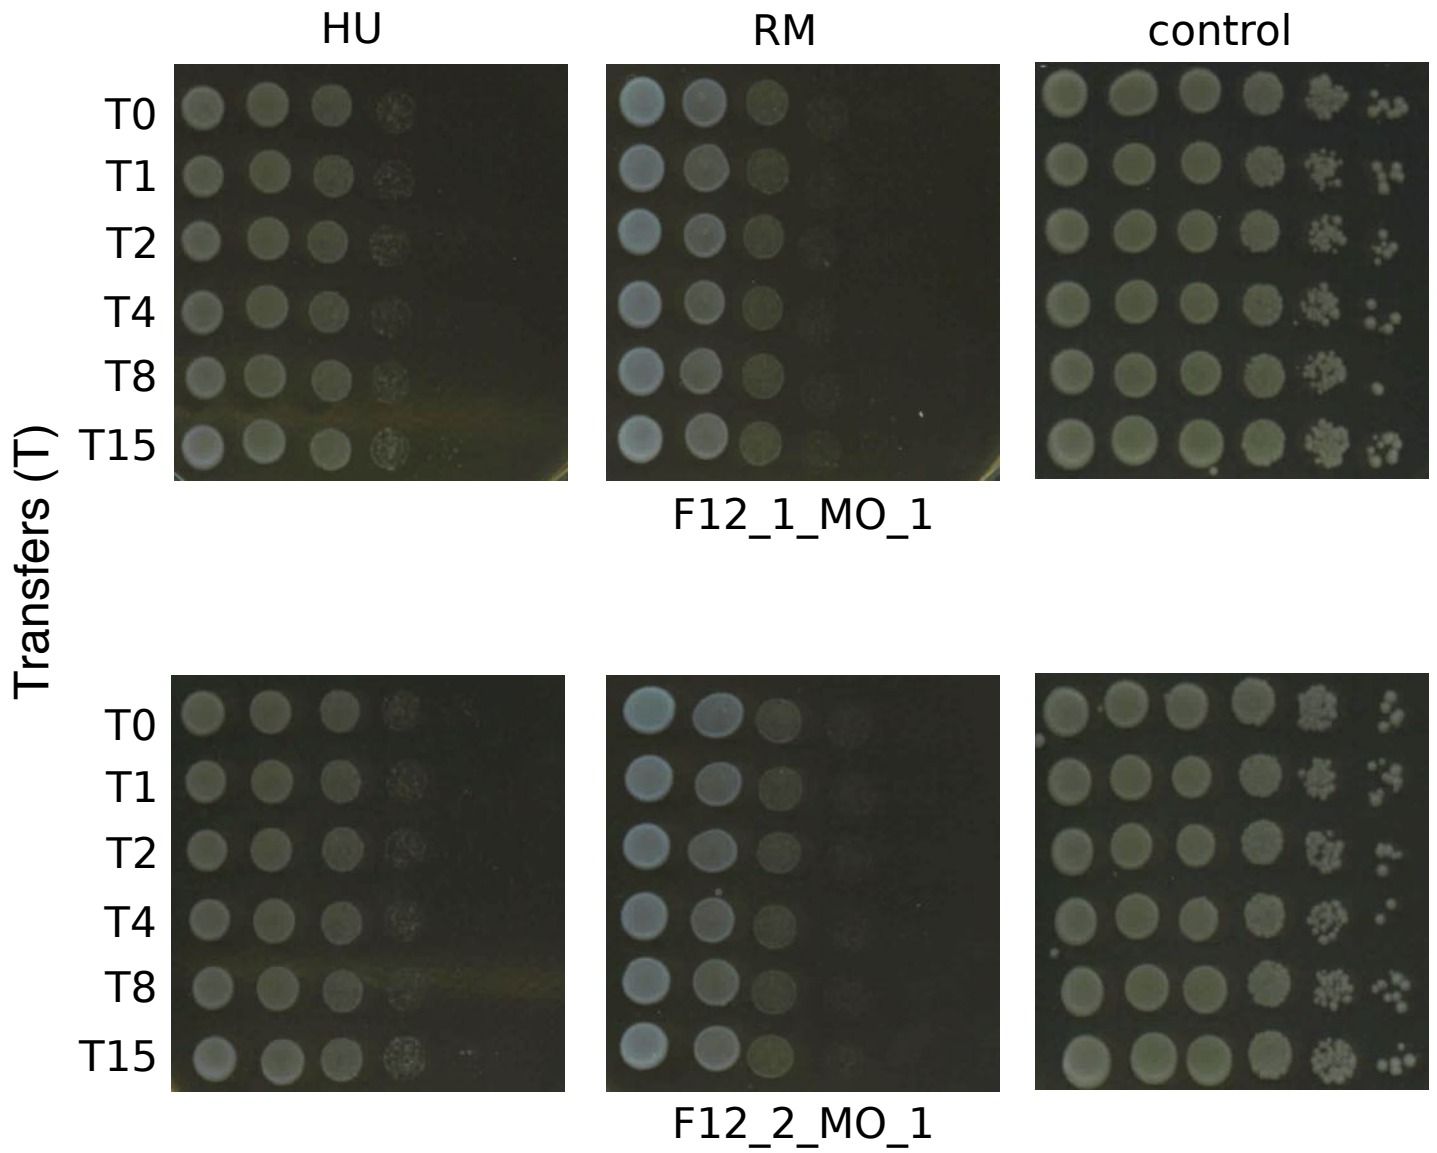

Figure S2

**A** four-parent populations in HU

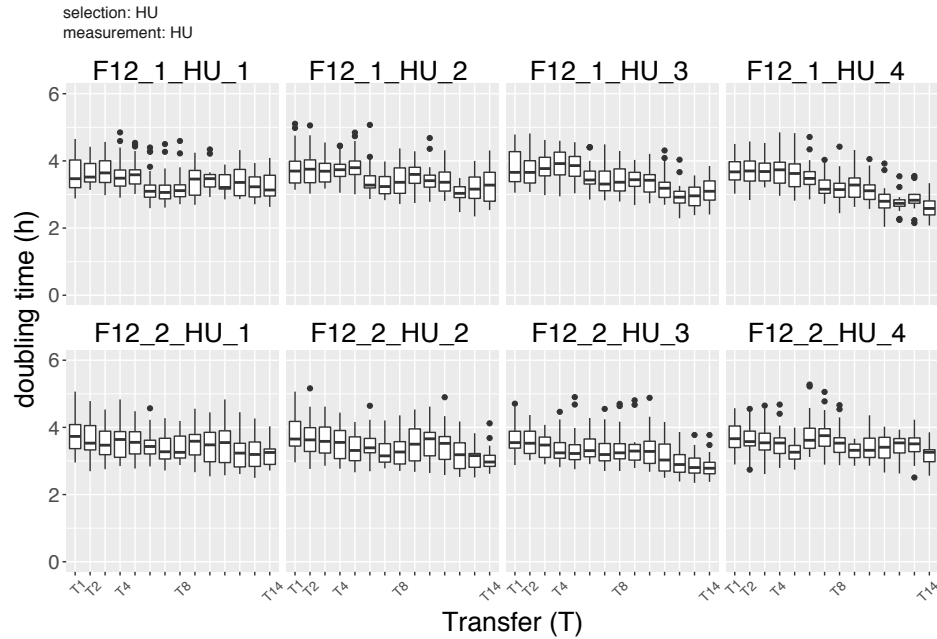

**C** two-parent populations in HU

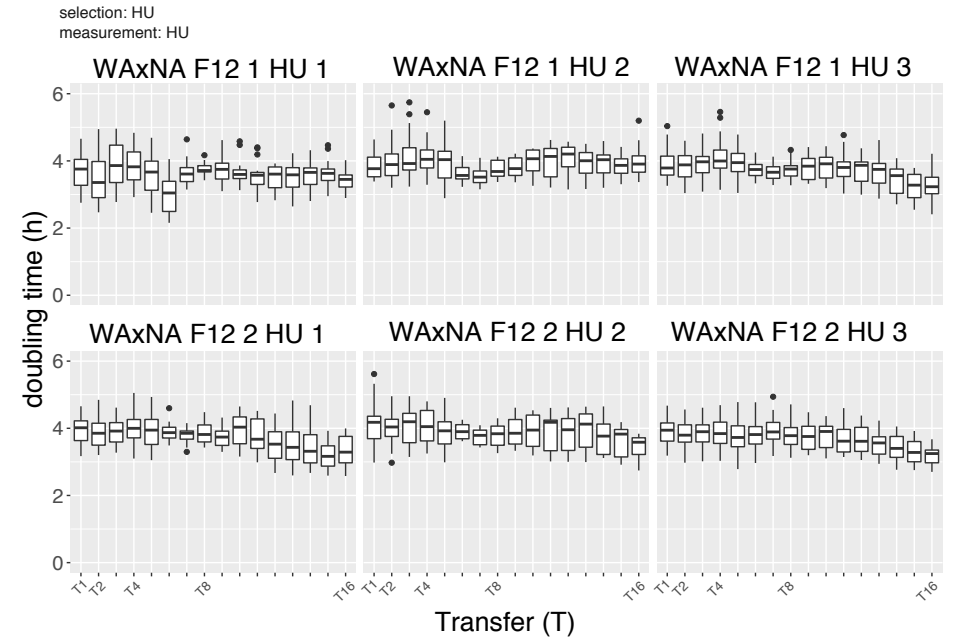

**B** four-parent populations in RM

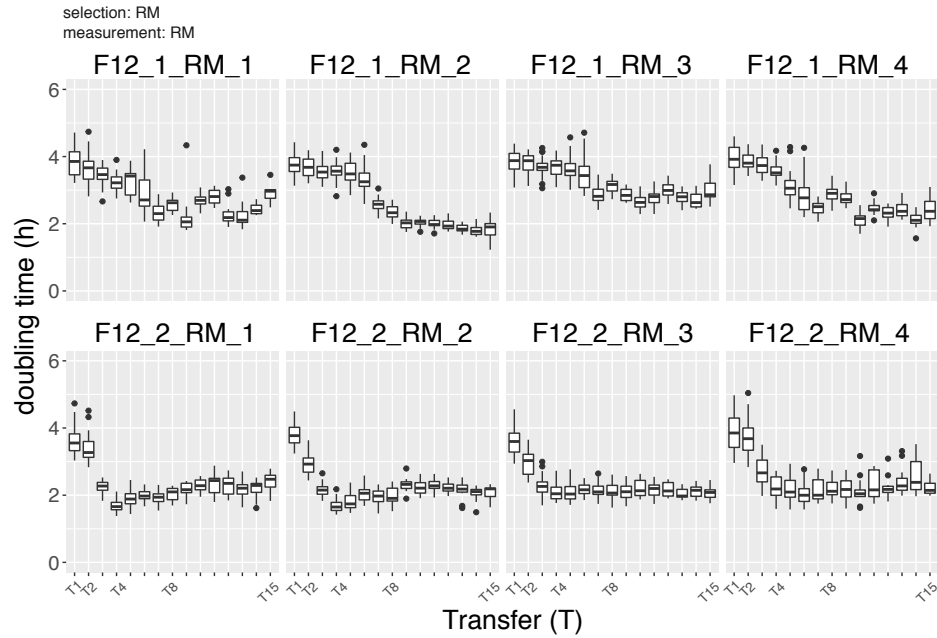

**D** two-parent populations in RM

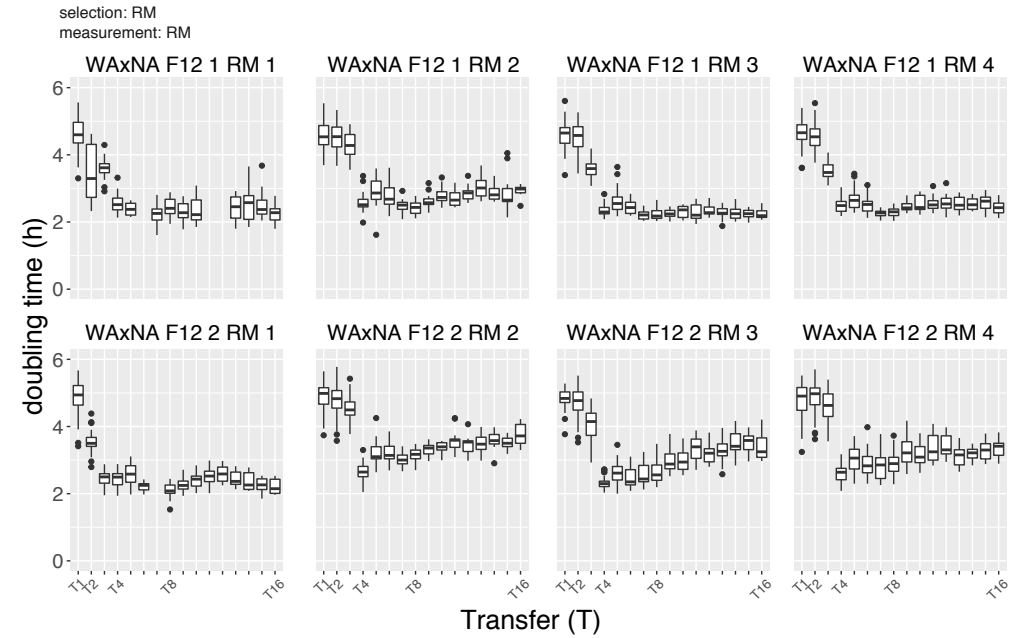

# Figure S3

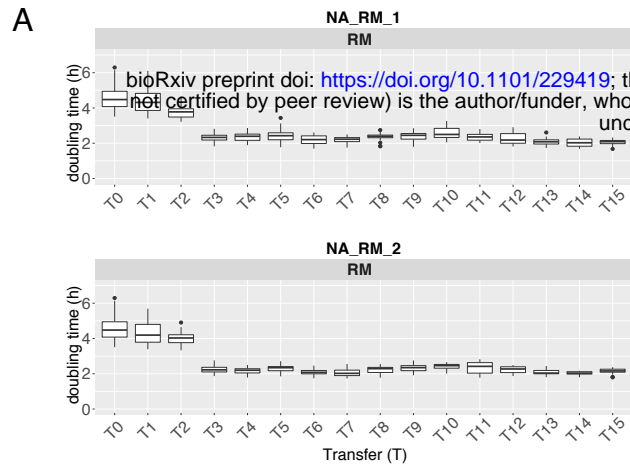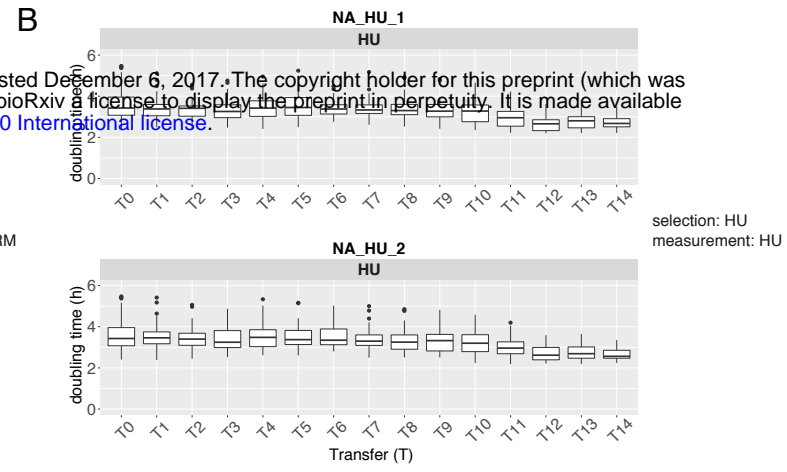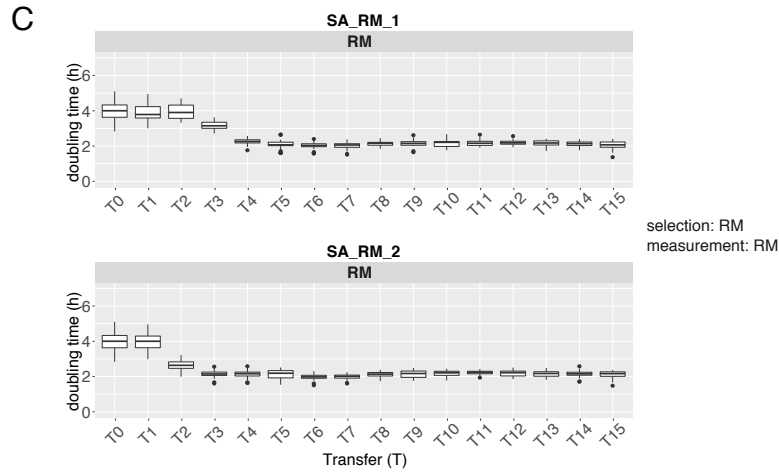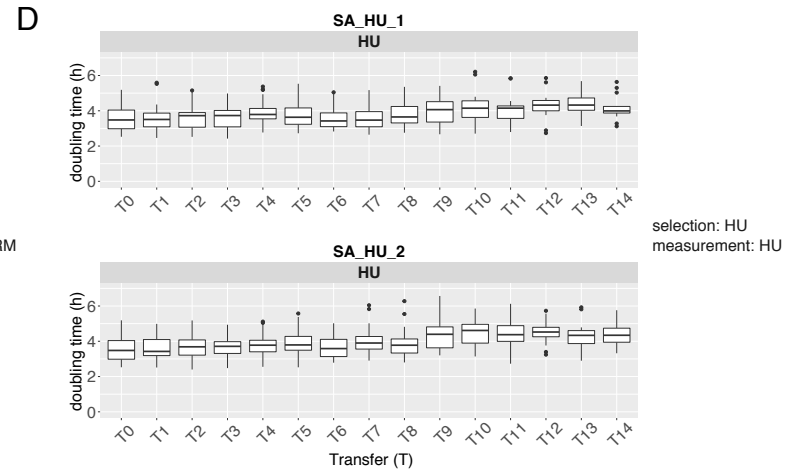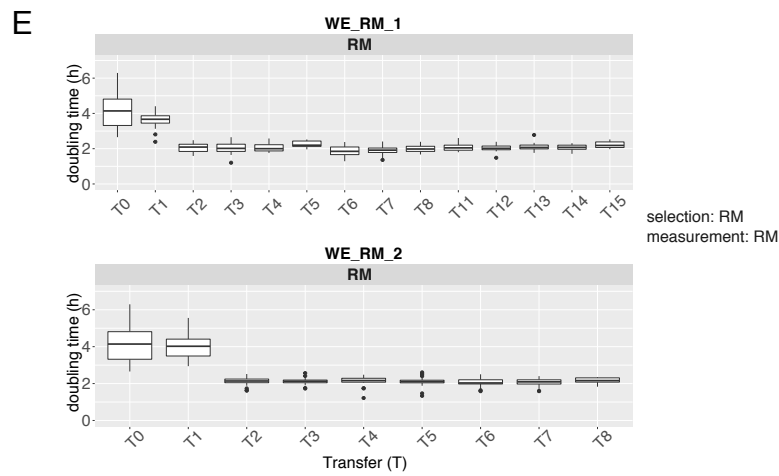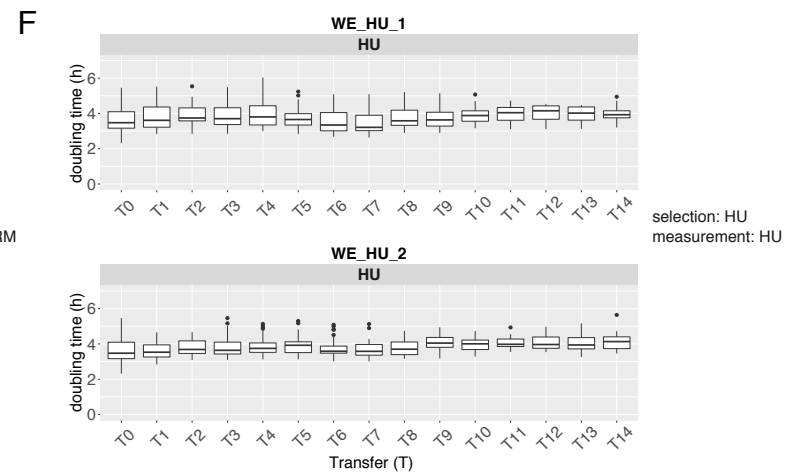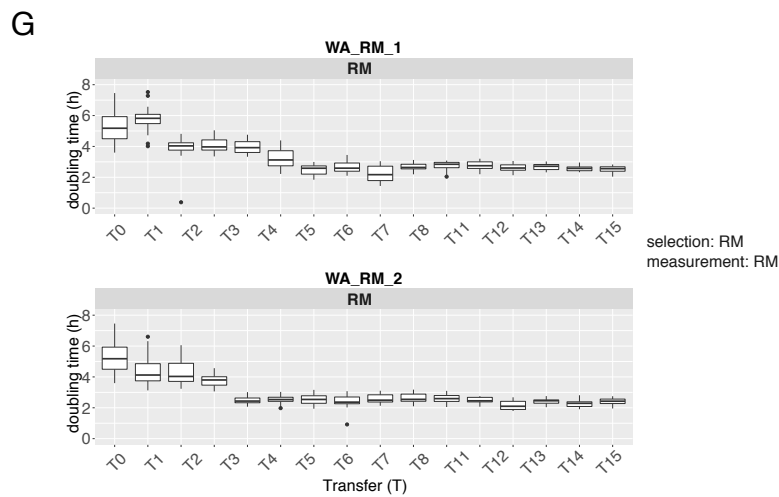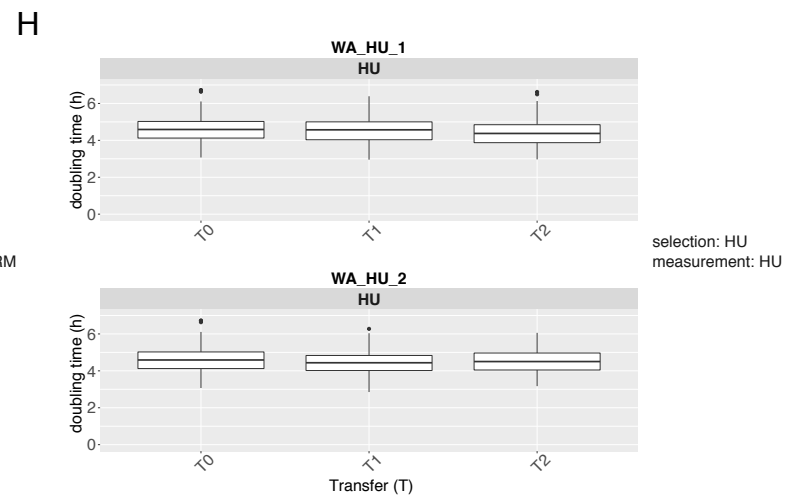



# Figure S4

**A** selection: RM  
measurement: control (no drug) and RM

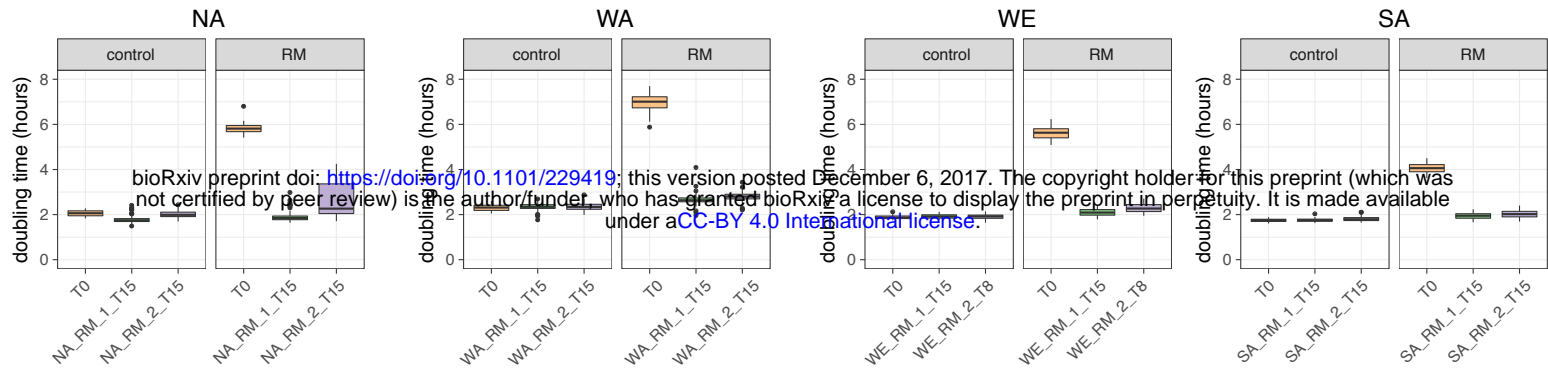

**B** selection: HU  
measurement: control (no drug) and HU

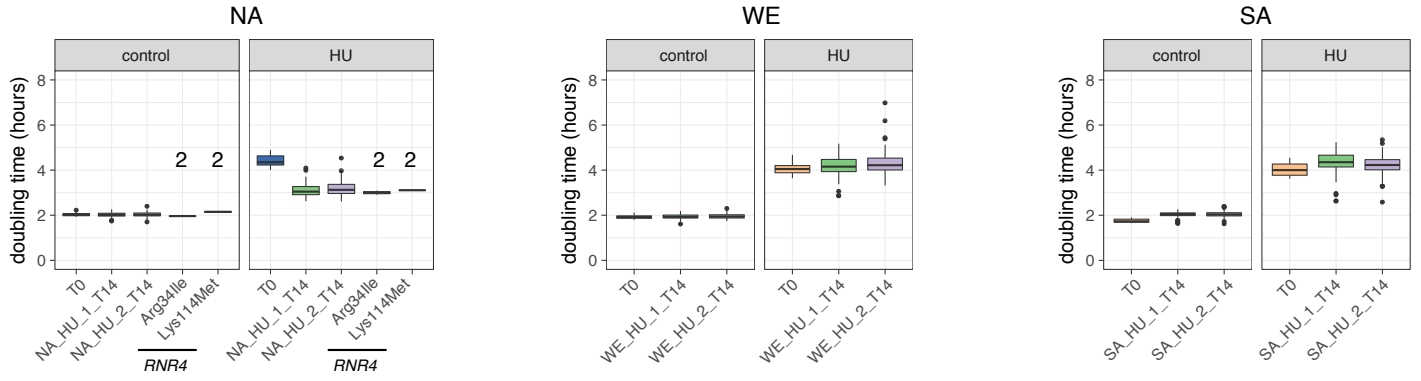

**C** selection: RM  
measurement: control (no drug) and RM

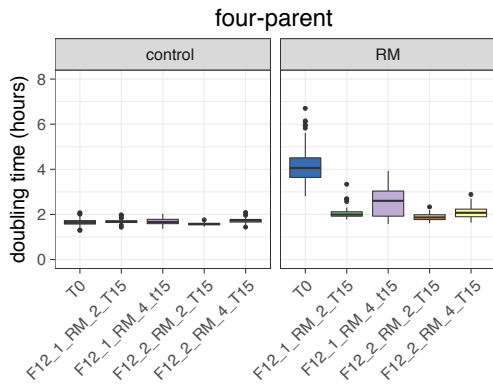

**D** selection: HU  
measurement: control (no drug) and HU

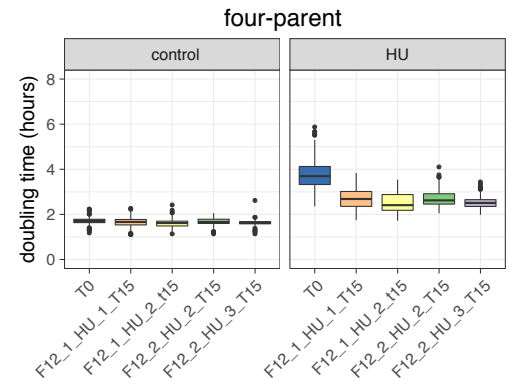

Figure S5

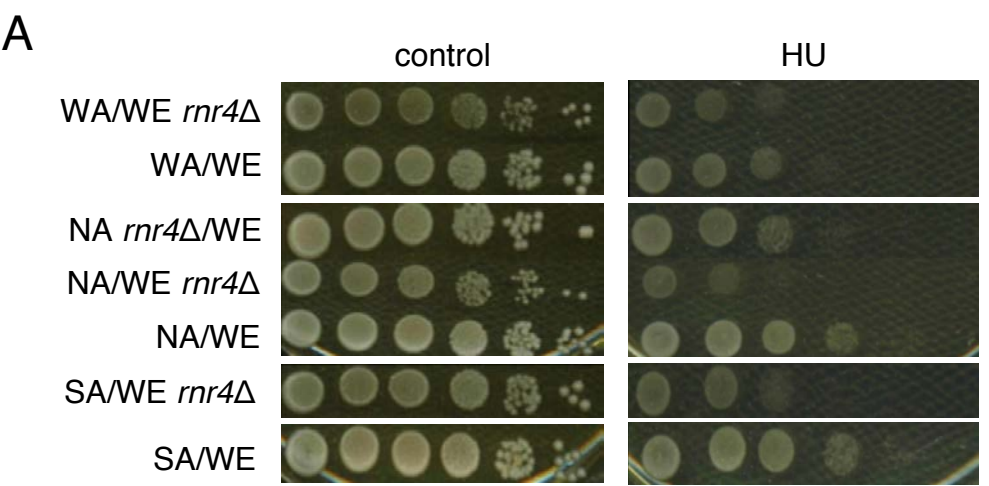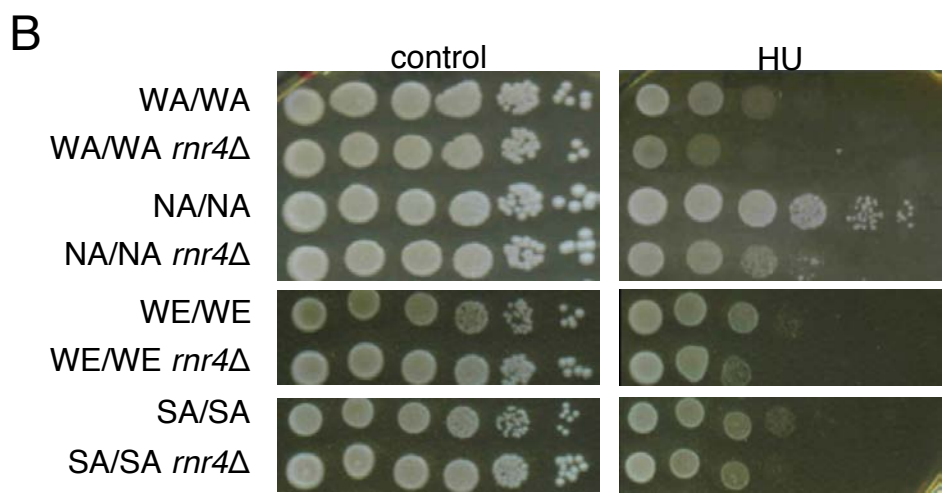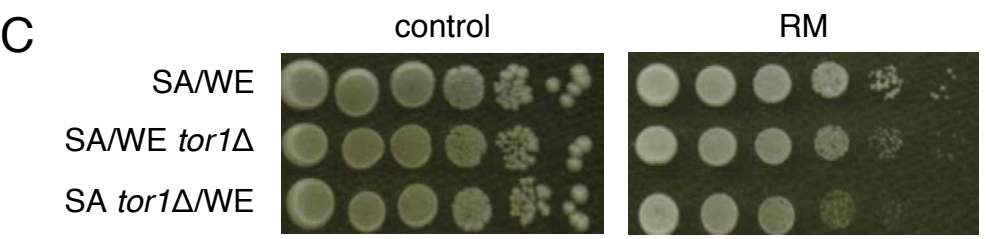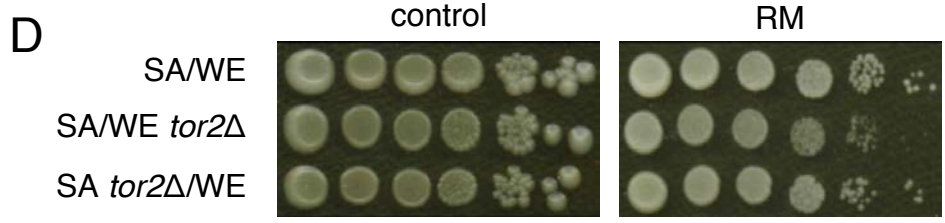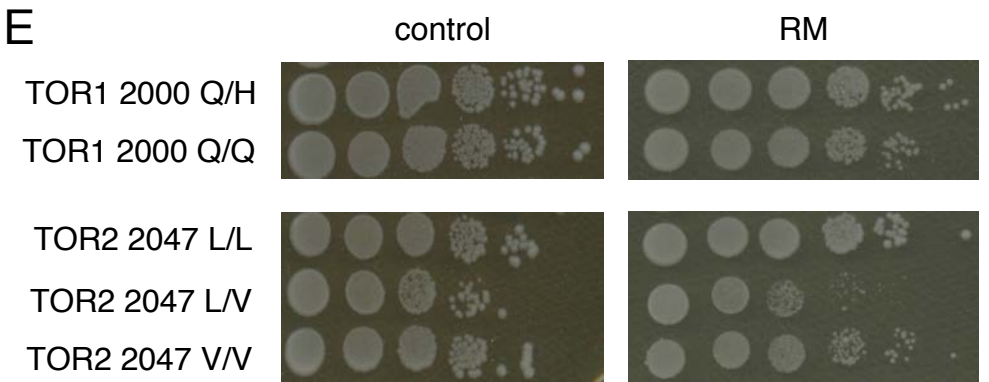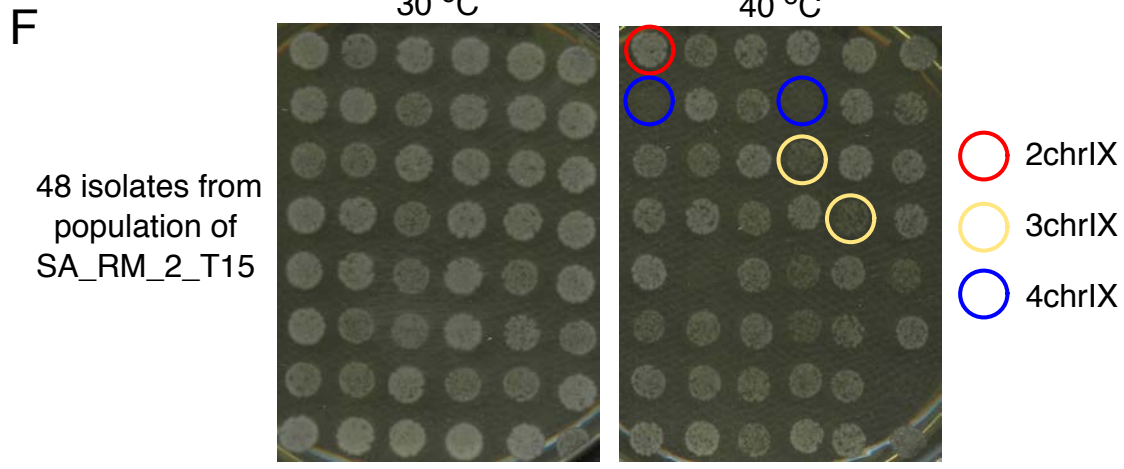

Figure S6

A

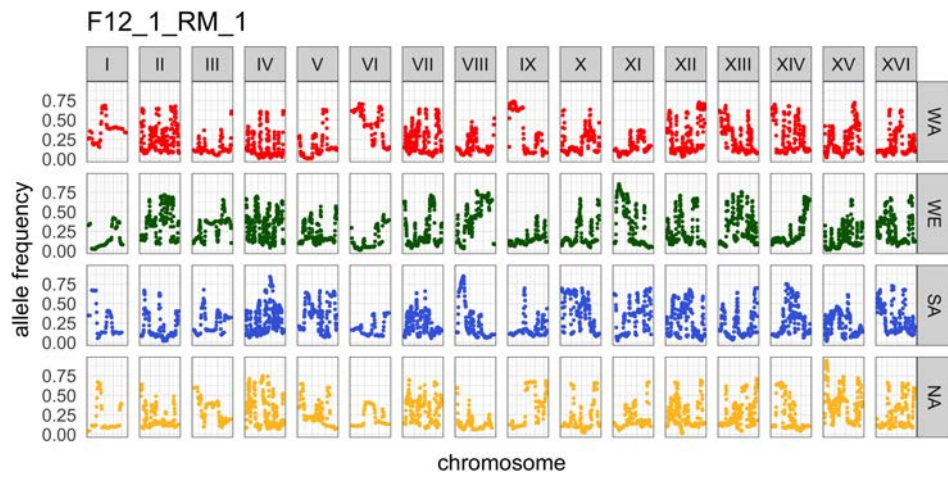

D

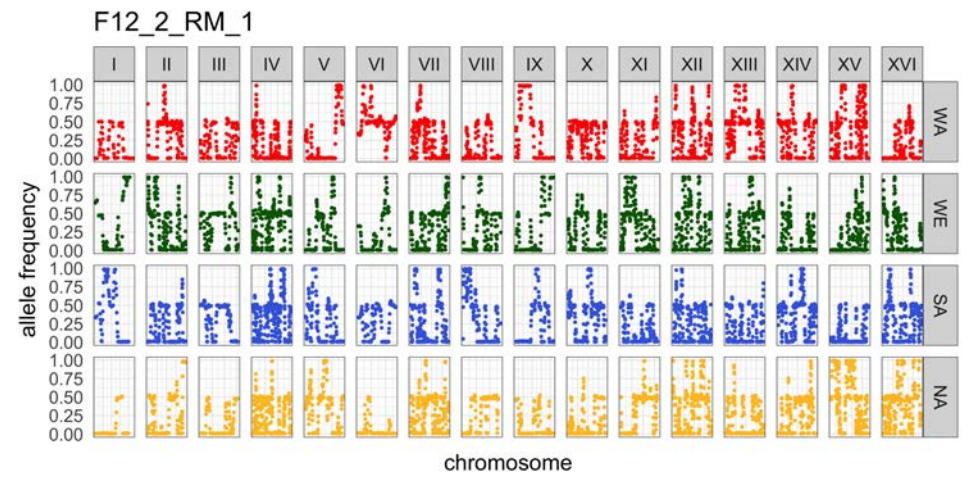

B

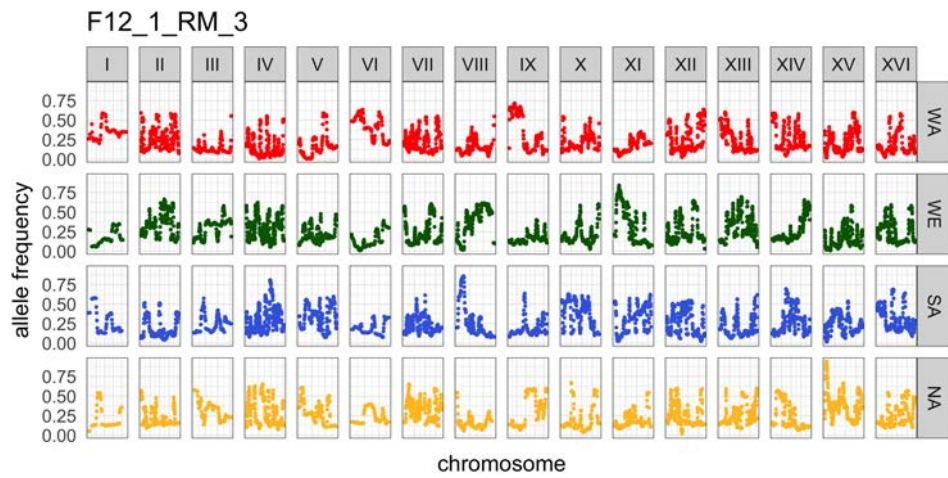

E

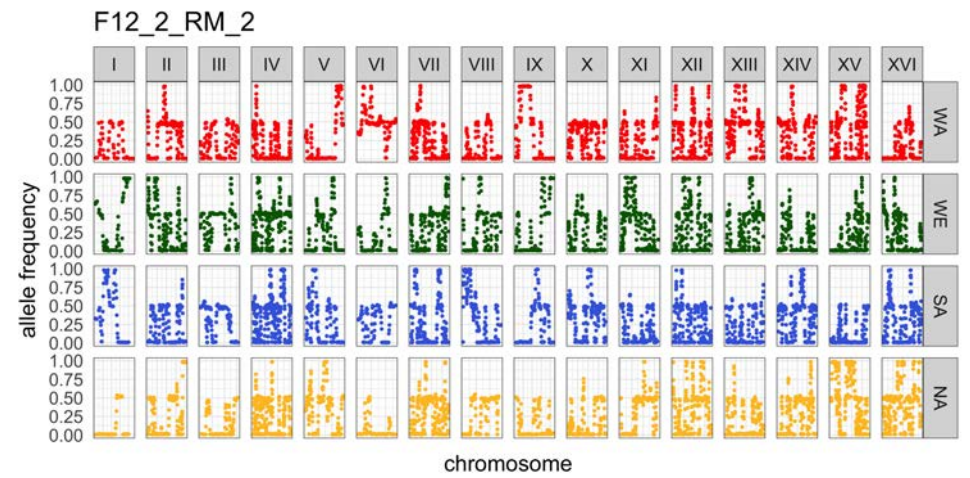

C

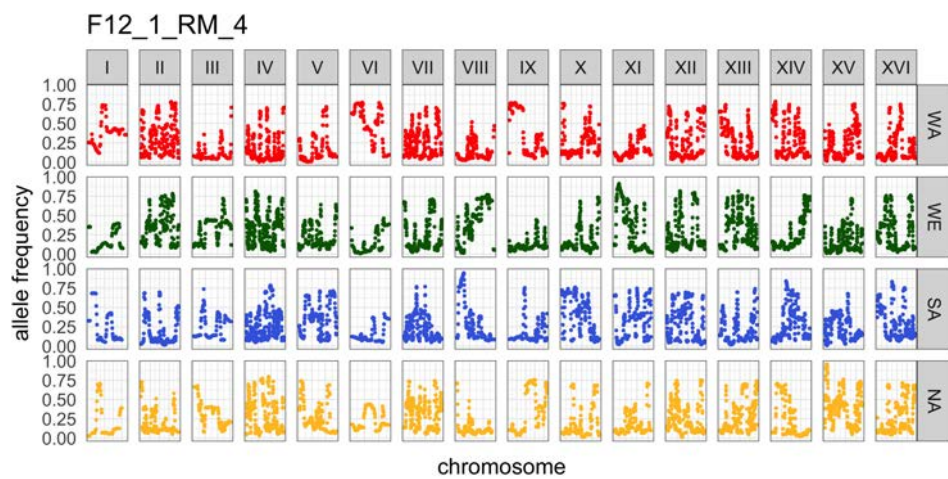

Figure S7

F12\_1\_RM\_1

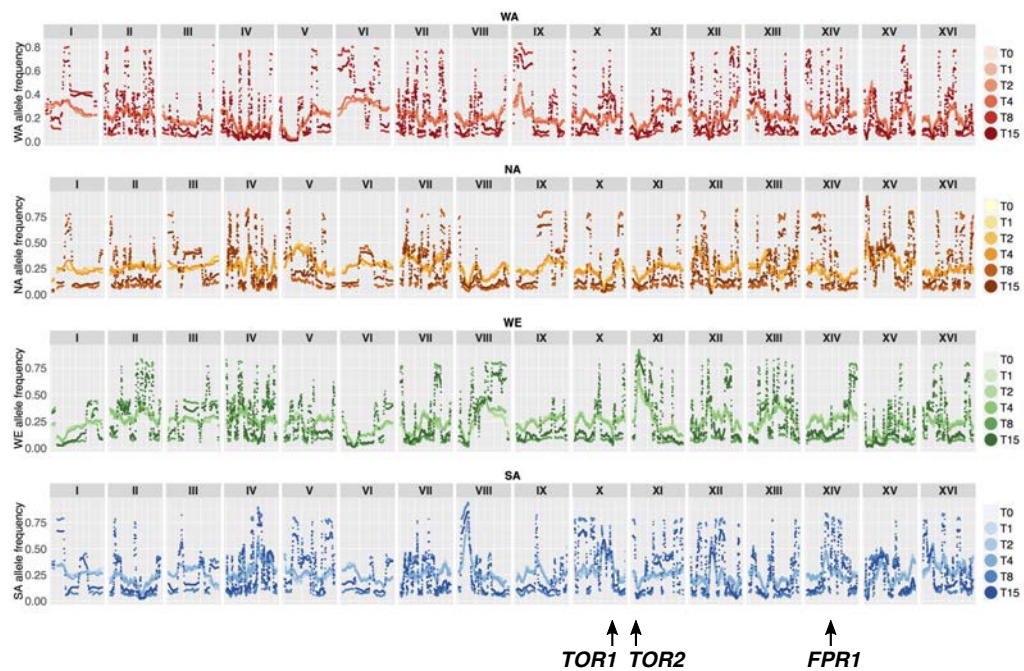

F12\_1\_HU\_2

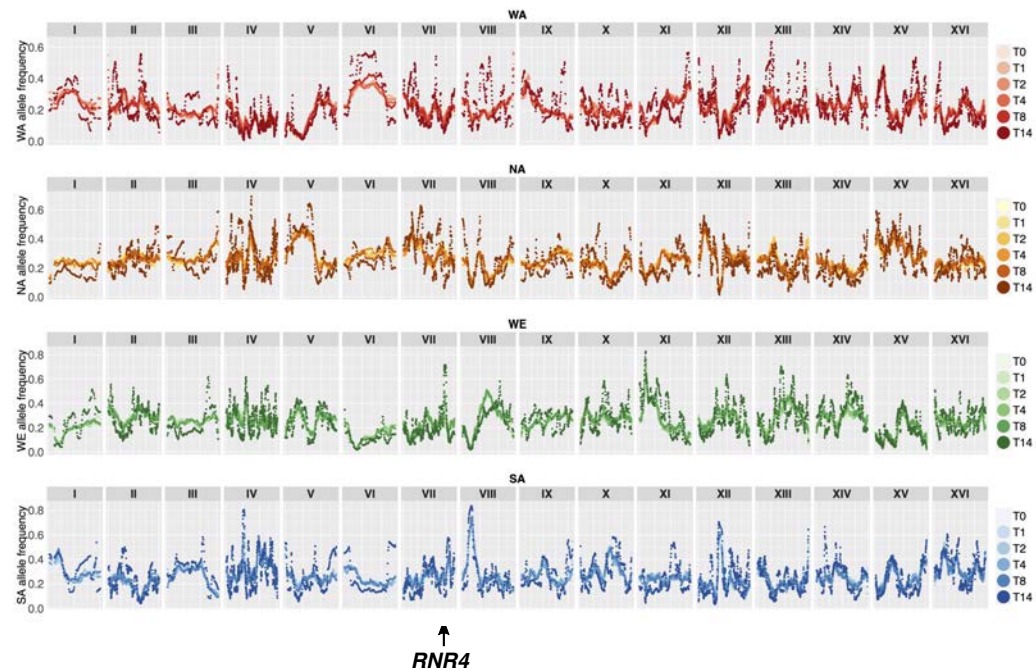

Figure S8

A

bioRxiv preprint doi: <https://doi.org/10.1101/229419>; this version posted December 6, 2017. The copyright holder for this preprint (which was not certified by peer review) is the author/funder, who has granted bioRxiv a license to display the preprint in perpetuity. It is made available under aCC-BY 4.0 International license.

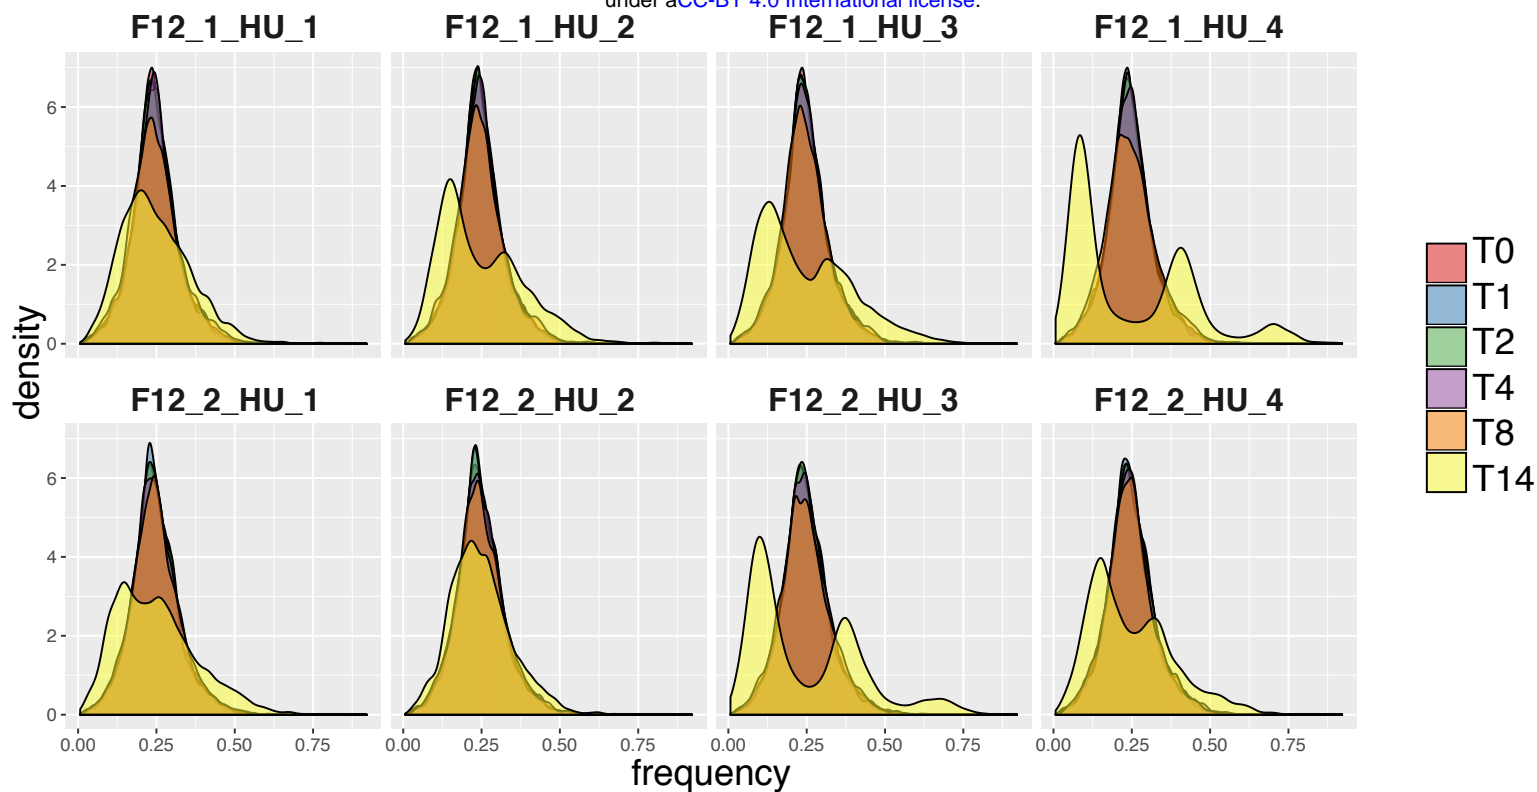

B

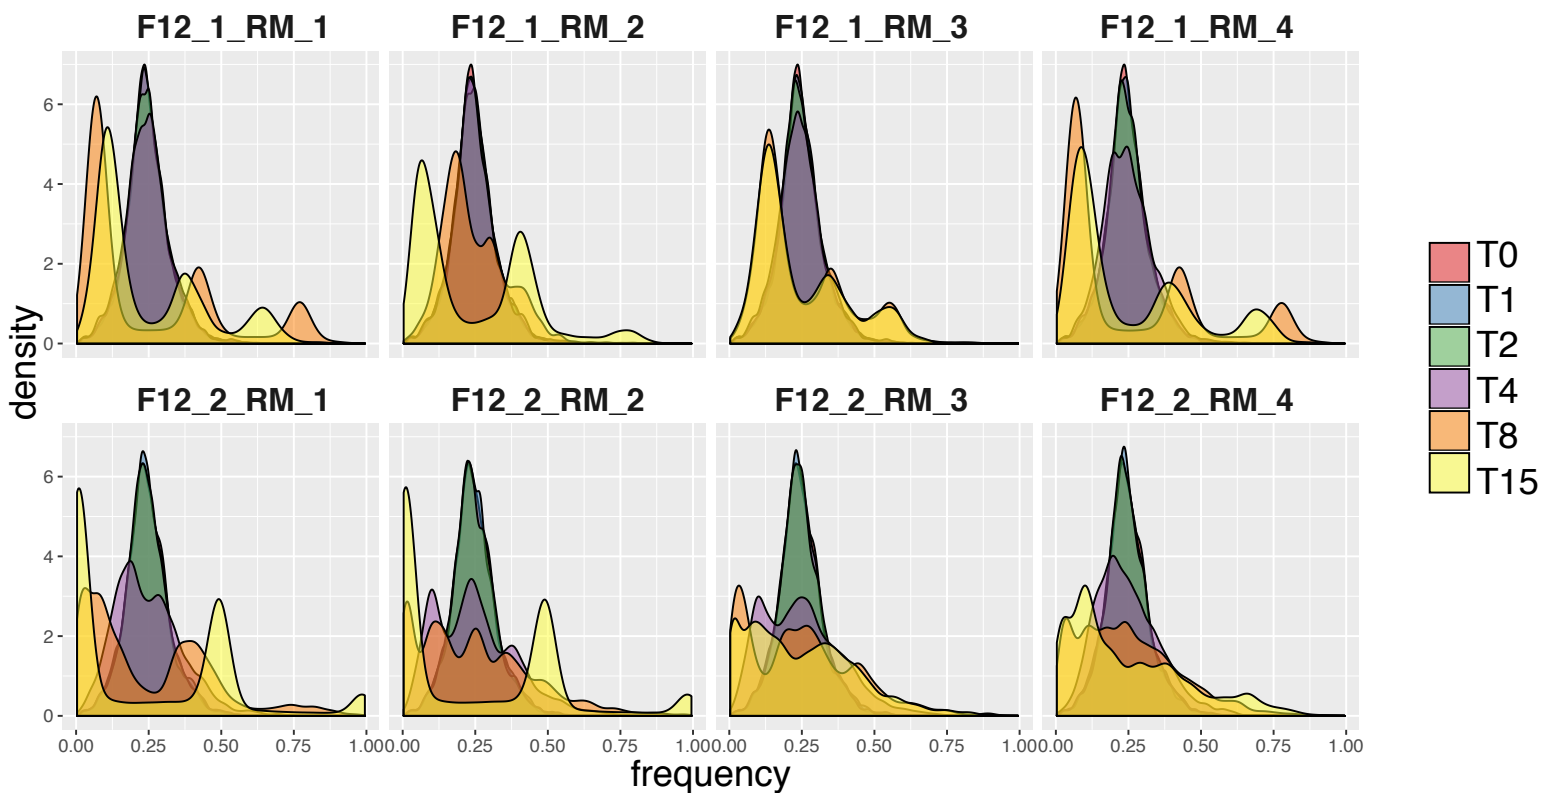

Figure S9 A

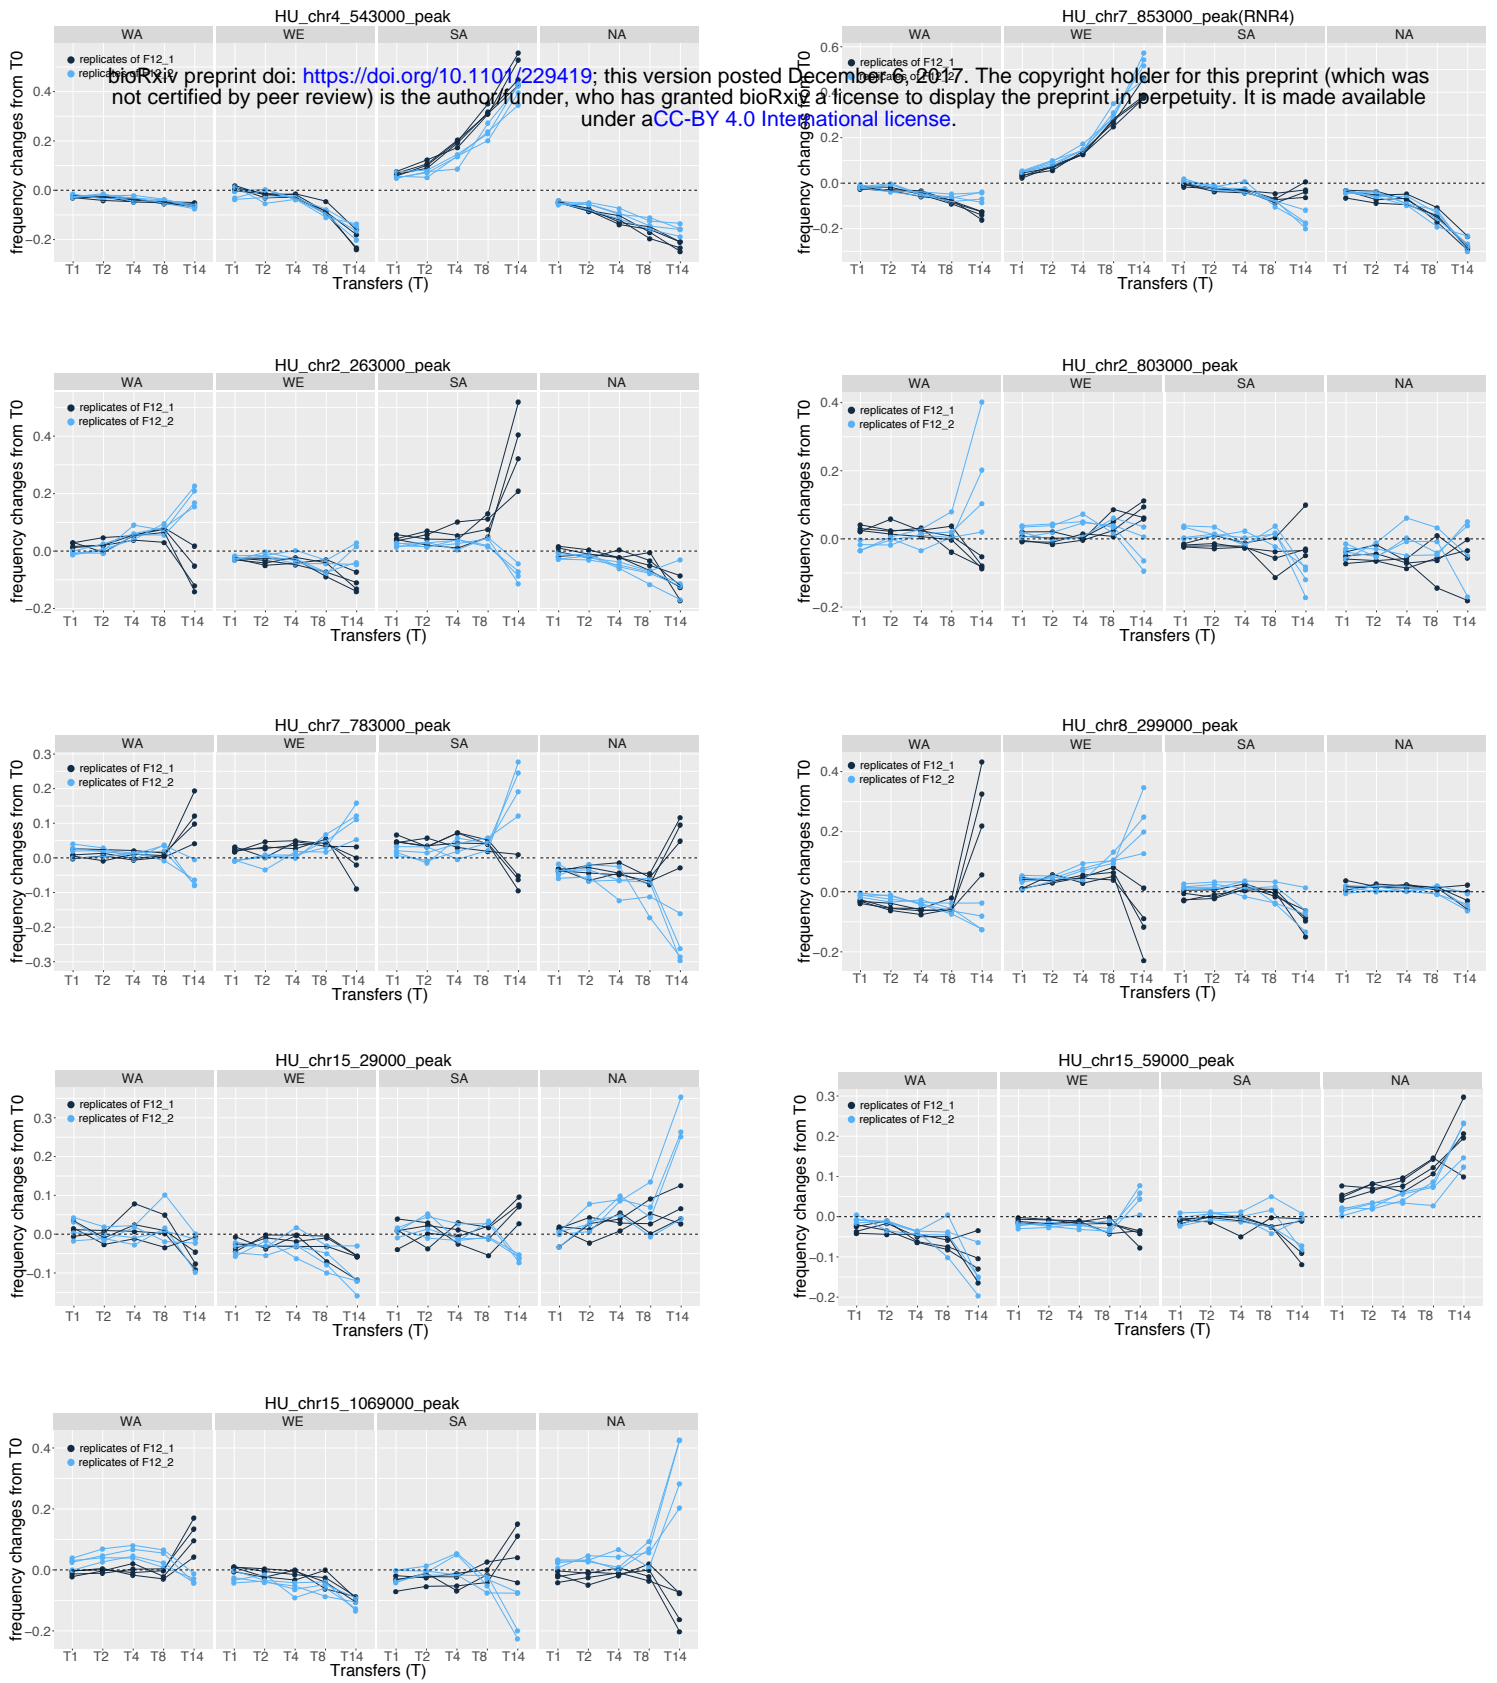

Figure S9 B

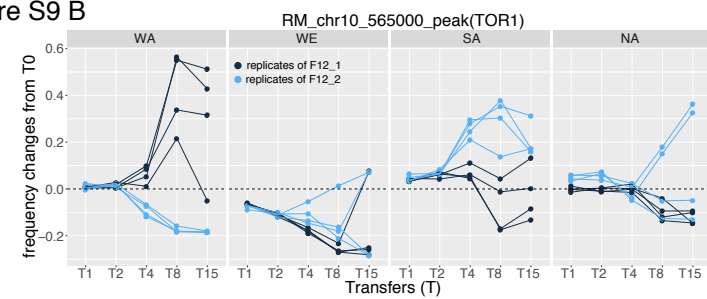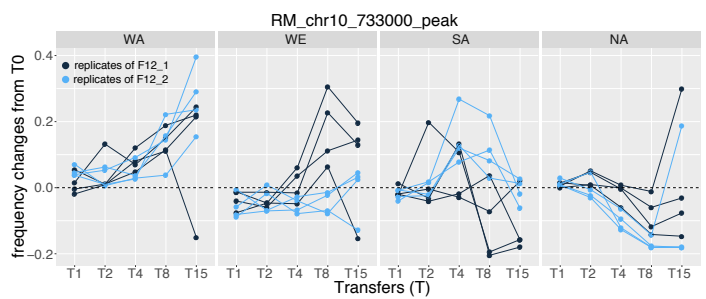

bioRxiv preprint doi: <https://doi.org/10.1101/229419>; this version posted December 6, 2017. The copyright holder for this preprint (which was not certified by peer review) is the author/funder, who has granted bioRxiv a license to display the preprint in perpetuity. It is made available under aCC-BY 4.0 International license.

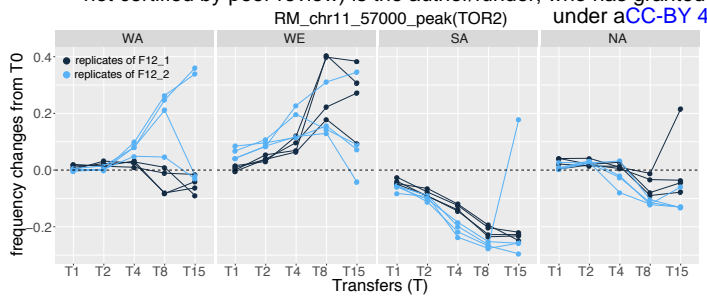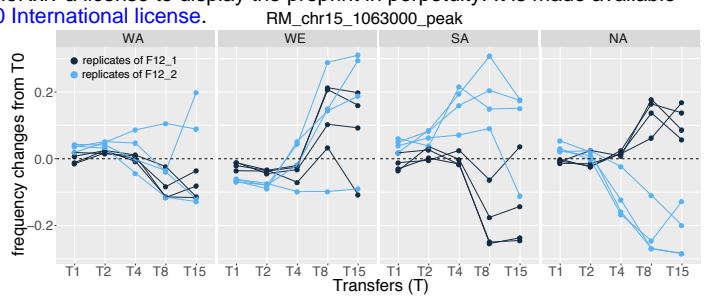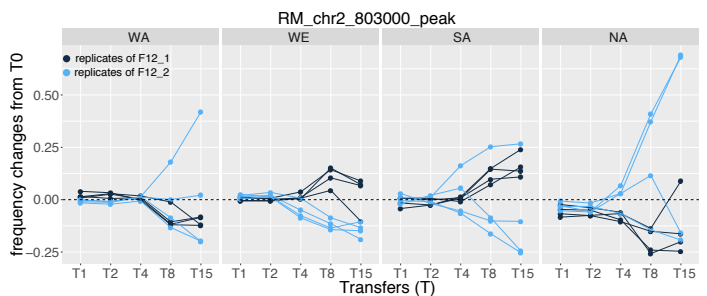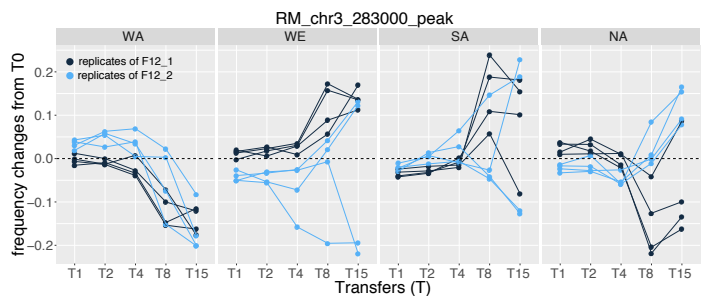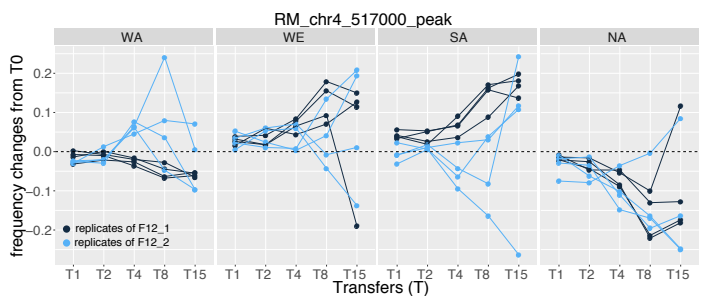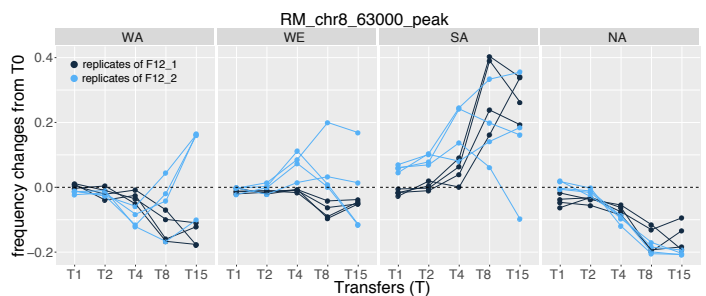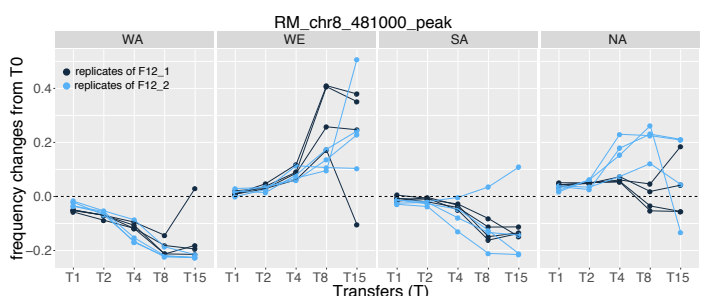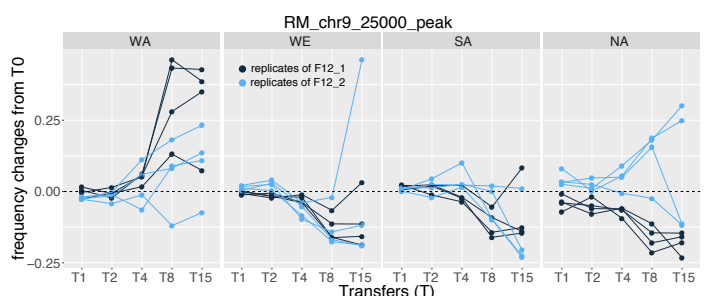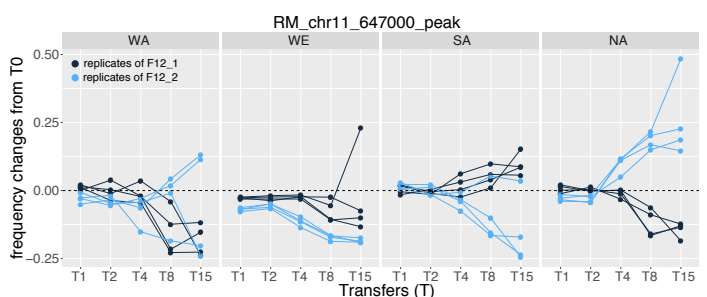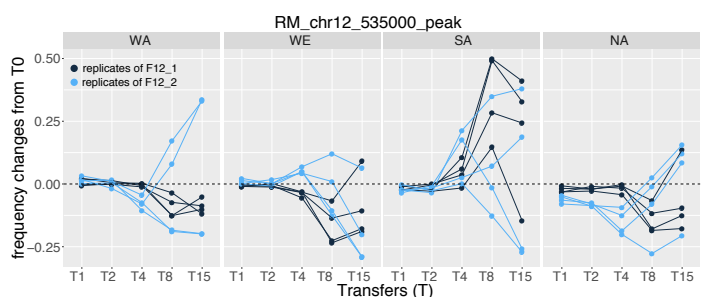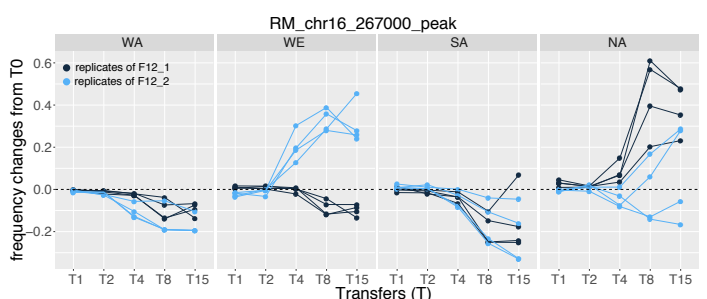

# Figure S10

A

bioRxiv preprint doi: <https://doi.org/10.1101/229419>; this version posted December 6, 2017. The copyright holder for this preprint (which was not certified by peer review) is the author/funder, who has granted bioRxiv a license to display the preprint in perpetuity. It is made available under aCC-BY 4.0 International license.

## QTLs in RM

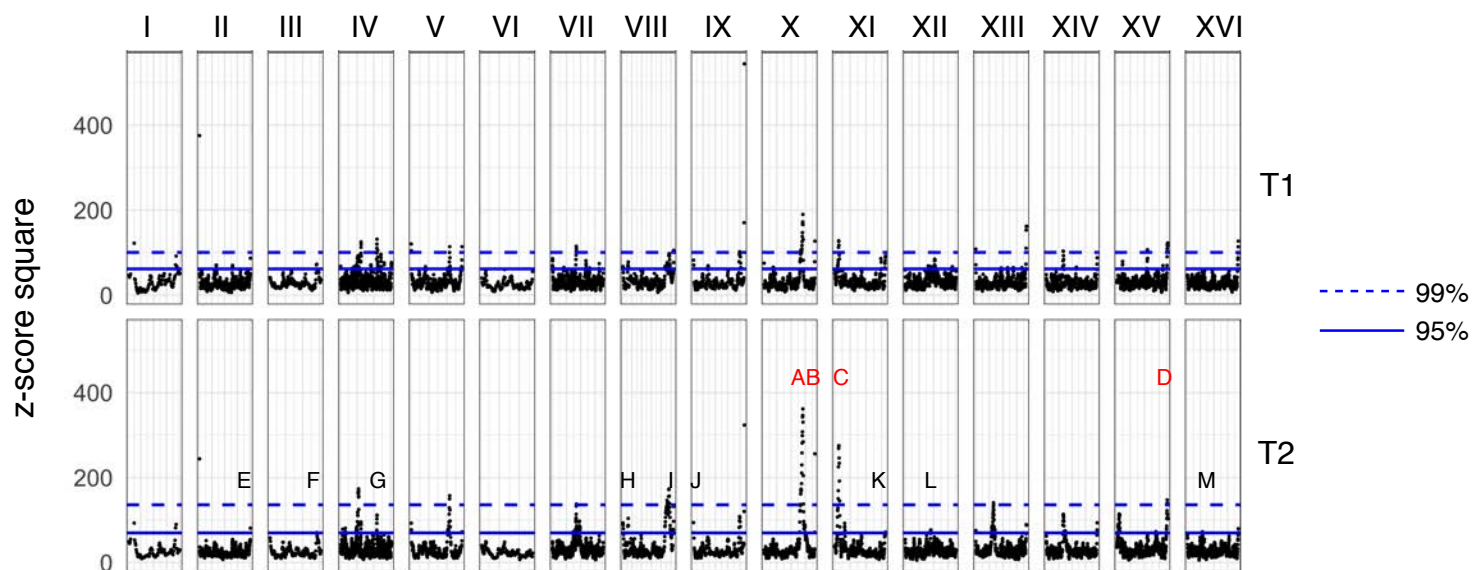

B

## QTLs in Control

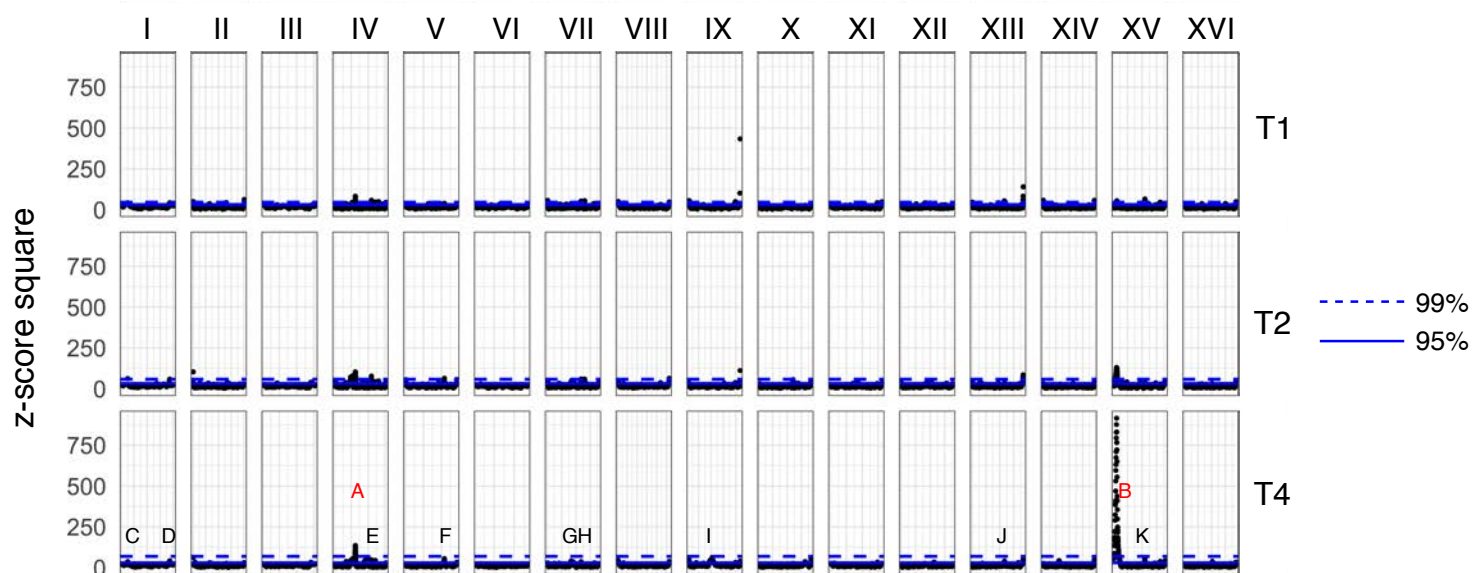



# Figure S11

A

## TOR1

bioRxiv preprint doi: <https://doi.org/10.1101/229419>; this version posted December 6, 2017. The copyright holder for this preprint (which was not certified by peer review) is the author/funder, who has granted bioRxiv a license to display the preprint in perpetuity. It is made available under aCC-BY 4.0 International license.

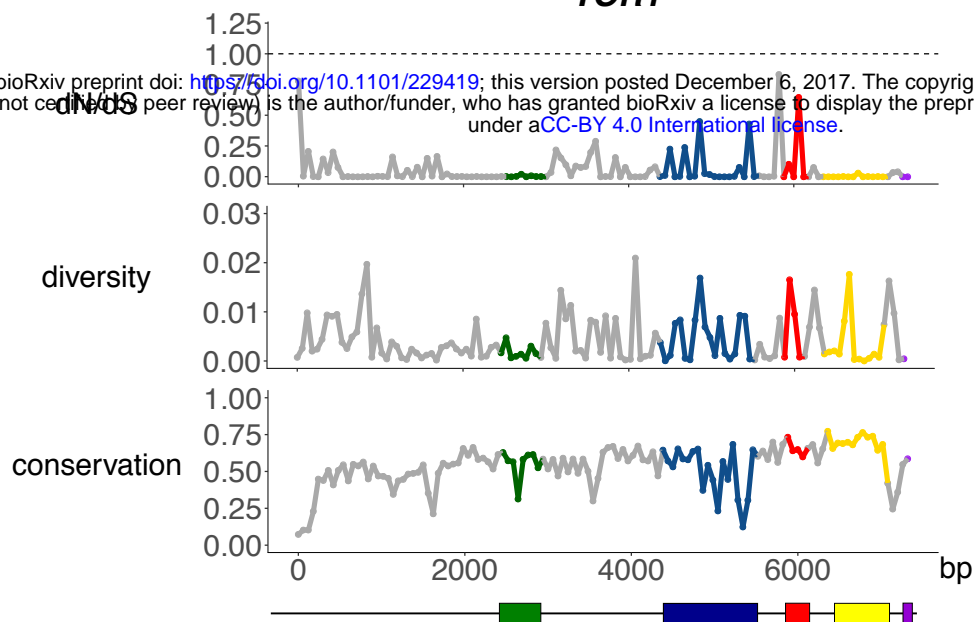

### domain

- DUF3385
- FAT
- RM\_binding
- PI3\_PI4\_kinase
- FATC

☆ *de novo* mutations

○ standing variants

☆ ● SIFT score < 0.05

B

## TOR2

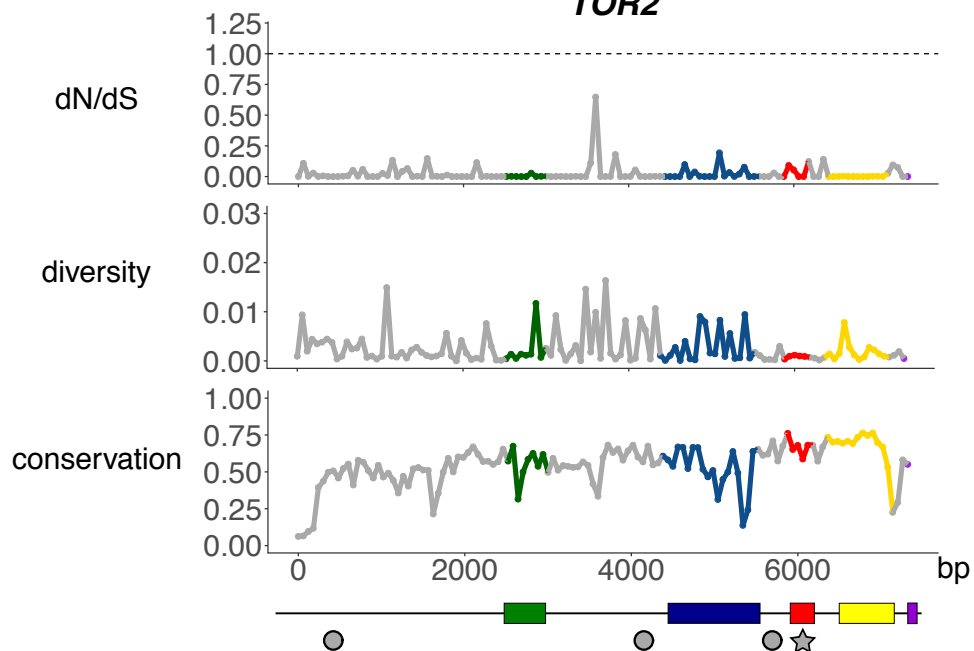

### domain

- ribonucleotide\_reductase

☆ *de novo* mutations

○ standing variants

☆ ● SIFT score < 0.05

C

## RNR4

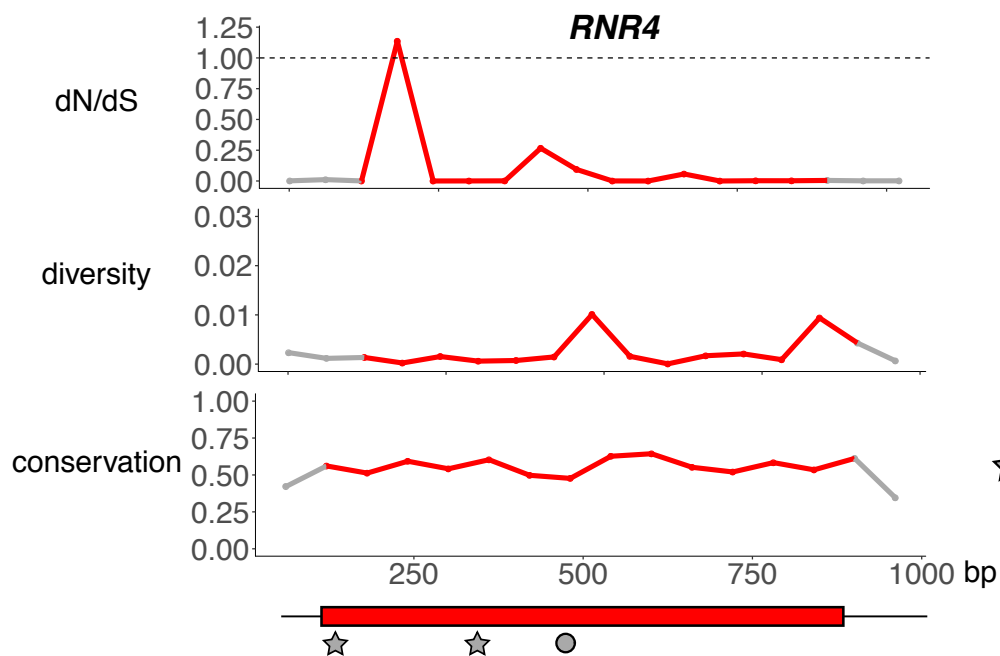

# Figure S12

bioRxiv preprint doi: <https://doi.org/10.1101/229419>; this version posted December 6, 2017. The copyright holder for this preprint (which was not certified by peer review) is the author/funder, who has granted bioRxiv a license to display the preprint in perpetuity. It is made available under aCC-BY 4.0 International license.

**A**

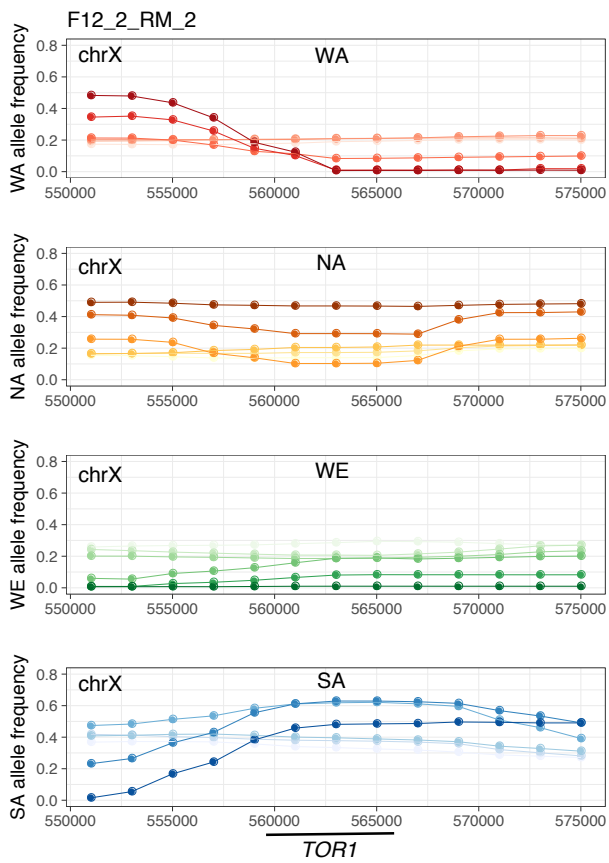

**B**

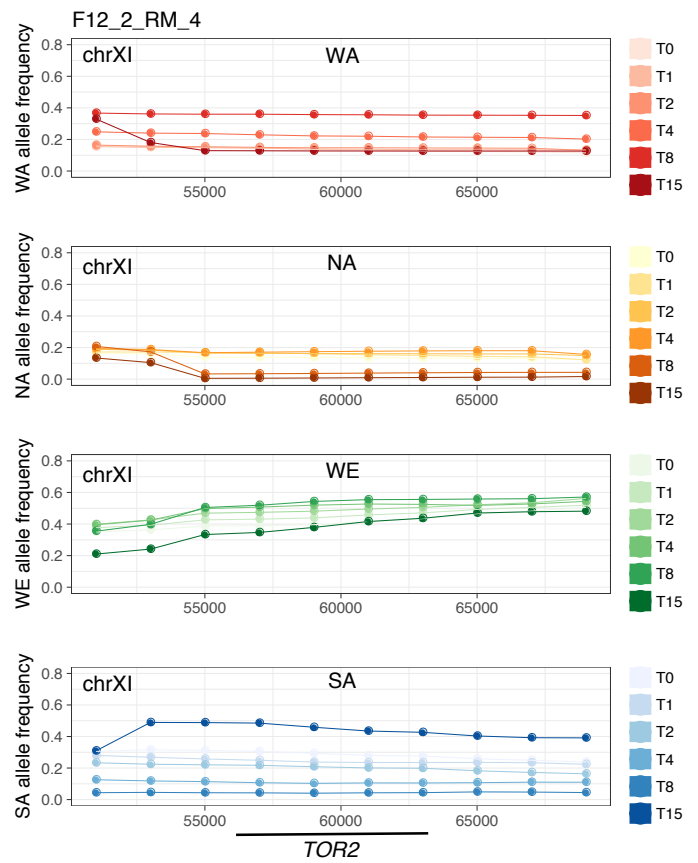

Figure S13

A

bioRxiv preprint doi: <https://doi.org/10.1101/229419>; this version posted December 6, 2017. The copyright holder for this preprint (which was not certified by peer review) is the author/funder, who has granted bioRxiv a license to display the preprint in perpetuity. It is made available

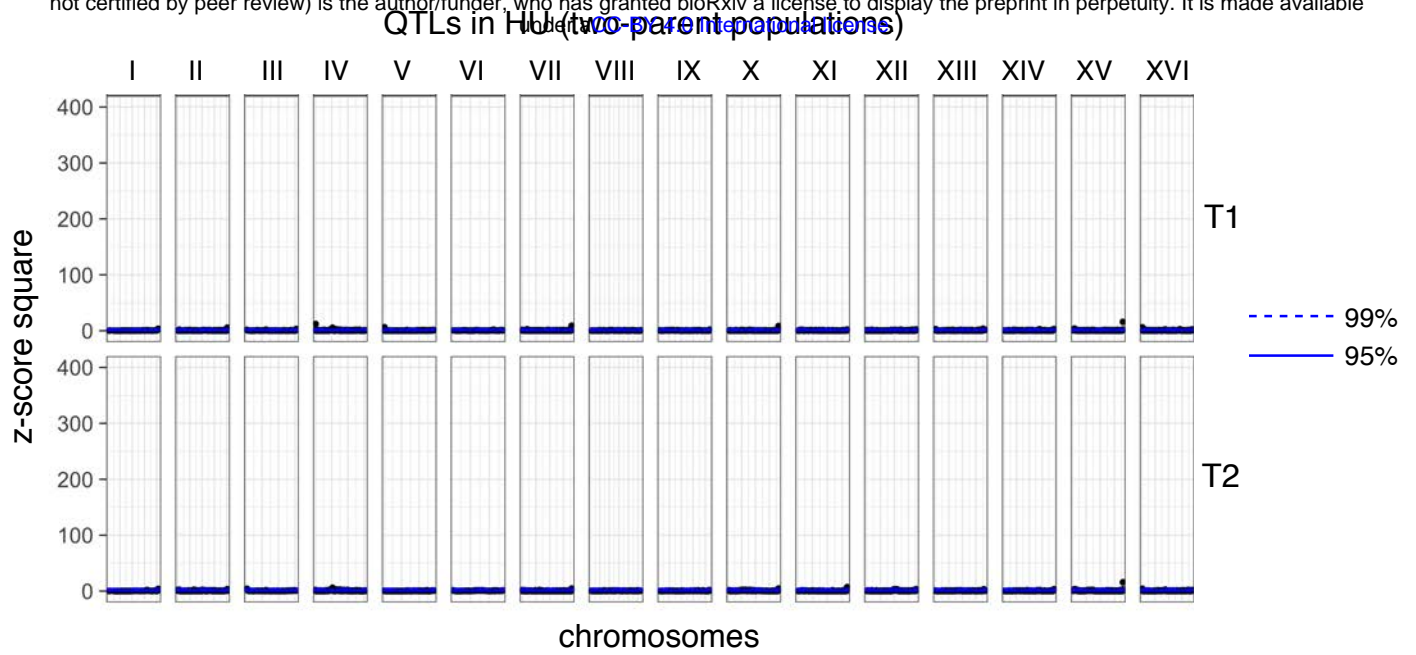

B

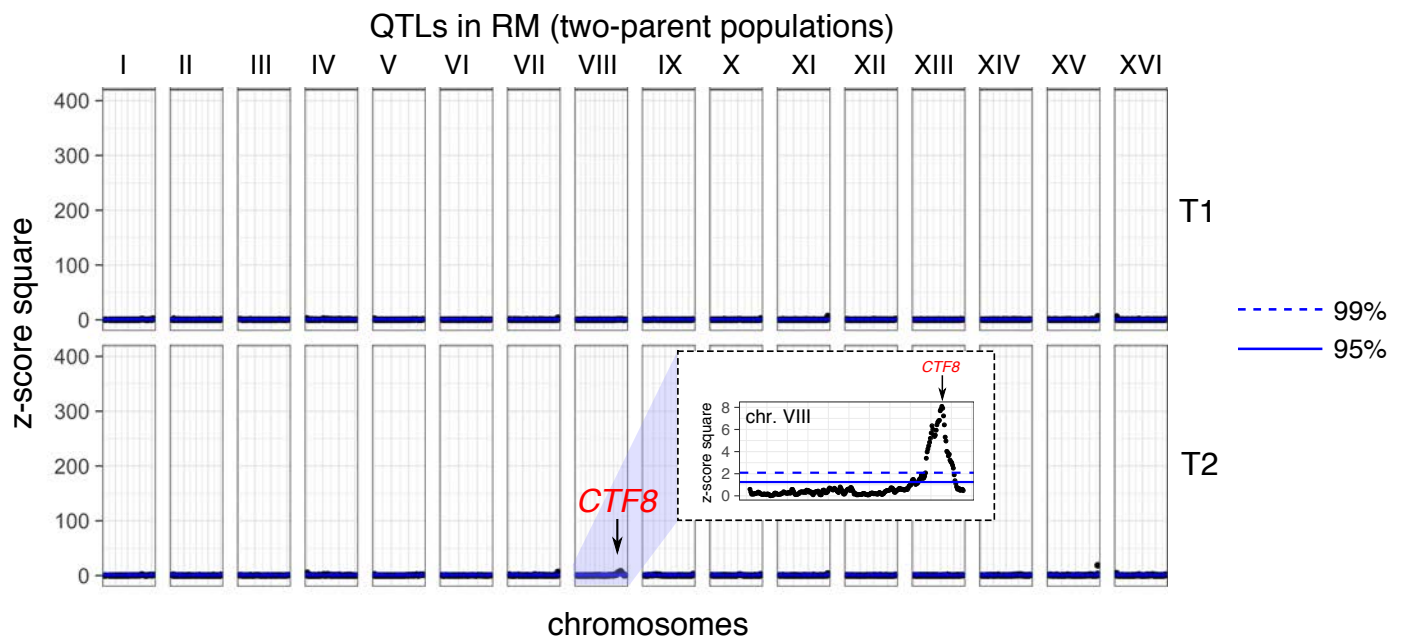

Source: https://www.biorxiv.org/content/10.1101/229419v1.full.pdf
